# Supplementary material
Source: publisher site journal article supplement (https://www.dovepress.com/article/358498)
Supplement: Supplementary file 1 [file get_supplementary_file.php]

**Table S1**. Totally 413 putative targets of HDWE

| No. | Gene Symbol | No. | Gene Symbol | No. | Gene Symbol |
| --- | --- | --- | --- | --- | --- |
| 1 | ABCB1 | 141 | FABG | 281 | OPRD1B |
| 2 | ABCB1A | 142 | FABH | 282 | OPRM1 |
| 3 | ABCC1 | 143 | FABI | 283 | P2RX2 |
| 4 | ABCC2 | 144 | FABP1 | 284 | P2RY14 |
| 5 | ABCG2 | 145 | FABP3 | 285 | P2RY2 |
| 6 | ACHE | 146 | FABP4 | 286 | P2RY4 |
| 7 | ACLY | 147 | FABP5 | 287 | P2RY6 |
| 8 | ACP1 | 148 | FABZ | 288 | P4HB |
| 9 | ADA | 149 | FAP | 289 | PADI3 |
| 10 | ADK | 150 | FASN | 290 | PADI4 |
| 11 | ADOK | 151 | FFAR1 | 291 | PARG |
| 12 | ADORA1 | 152 | FGB | 292 | PARP1 |
| 13 | ADORA2A | 153 | FGF1 | 293 | PDE4D |
| 14 | ADORA2B | 154 | FGF2 | 294 | PDE5A |
| 15 | ADORA3 | 155 | FIMH | 295 | PFKFB3 |
| 16 | ADRA2A | 156 | FLT3 | 296 | PGAM1 |
| 17 | ADRA2C | 157 | FNTA | 297 | PGD |
| 18 | ADRB1 | 158 | FNTB | 298 | PGR |
| 19 | ADRB2 | 159 | FOS | 299 | PHLPP2 |
| 20 | AGL | 160 | FTO | 300 | PIK3CG |
| 21 | AGRA | 161 | G6PD | 301 | PIK3R1 |
| 22 | AGTR1 | 162 | GAA | 302 | PIM1 |
| 23 | AK | 163 | GAG | 303 | PIN1 |
| 24 | AKR1A1 | 164 | GAPC | 304 | PKN1 |
| 25 | AKR1B1 | 165 | GAPDH | 305 | PLA2 |
| 26 | AKR1B10 | 166 | GGTA1 | 306 | PLA2G1B |
| 27 | AKR1C1 | 167 | GJB2 | 307 | PLCG1 |
| 28 | AKR1C2 | 168 | GLA | 308 | PLK1 |
| 29 | AKR1C21 | 169 | GLB1 | 309 | POL |
| 30 | AKR1C3 | 170 | GLD-1 | 310 | POLB |
| 31 | AKR1C4 | 171 | GLO1 | 311 | PPARA |
| 32 | AKT1 | 172 | GPBAR1 | 312 | PPARD |
| 33 | ALDH1A2 | 173 | GPR35 | 313 | PPARG |
| 34 | ALDH1A7 | 174 | GRIK1 | 314 | PPO2 |
| 35 | ALDH1B1 | 175 | GRIK2 | 315 | PREP |
| 36 | ALDH2 | 176 | GRK6 | 316 | PRKCH |
| 37 | ALK | 177 | GSK3B | 317 | PROTEASE |
| 38 | ALOX12 | 178 | GUSB | 318 | PTGER1 |
| 39 | ALOX15 | 179 | HCAR2 | 319 | PTGER2 |
| 40 | ALOX5 | 180 | HES1 | 320 | PTGER4 |
| 41 | ALPI | 181 | HK2 | 321 | PTGES |
| 42 | AMY1A | 182 | HKDC1 | 322 | PTGIR |
| 43 | AMY2A | 183 | HMGCR | 323 | PTGS1 |
| 44 | ANTXR2 | 184 | HPSE | 324 | PTGS2 |
| 45 | AOC1 | 185 | HRAS | 325 | PTK2 |
| 46 | APAF1 | 186 | HSD11B1 | 326 | PTP4A3 |
| 47 | APEX1 | 187 | HSD11B2 | 327 | PTPN1 |
| 48 | APP | 188 | HSD17B1 | 328 | PTPN11 |
| 49 | AR | 189 | HSD17B2 | 329 | PTPN13 |
| 50 | ARG1 | 190 | HSD17B3 | 330 | PTPN2 |
| 51 | ASF1A | 191 | HSF1 | 331 | PTPN6 |
| 52 | ATG4B | 192 | HSP90AA1 | 332 | PTPRC |
| 53 | AURKB | 193 | HSPA5 | 333 | PTPRF |
| 54 | AVPR2 | 194 | IAP | 334 | PTPRS |
| 55 | AXL | 195 | IDO1 | 335 | PYGL |
| 56 | B4GALT1 | 196 | IGF1R | 336 | PYGM |
| 57 | BACE1 | 197 | IKBKG | 337 | RECA |
| 58 | BCL2 | 198 | IL1B | 338 | RELA |
| 59 | BCL2A1 | 199 | IL2 | 339 | REP |
| 60 | BCL2L1 | 200 | IL5 | 340 | REV |
| 61 | CA1 | 201 | IL6 | 341 | RORA |
| 62 | CA12 | 202 | IMA1 | 342 | RORC |
| 63 | CA13 | 203 | IMPDH1 | 343 | RPS6KA3 |
| 64 | CA14 | 204 | IMPDH2 | 344 | SAE1 |
| 65 | CA2 | 205 | INSR | 345 | SCD |
| 66 | CA3 | 206 | ITPR1 | 346 | SELL |
| 67 | CA4 | 207 | KCNA3 | 347 | SELP |
| 68 | CA5A | 208 | KCNB1 | 348 | SENP6 |
| 69 | CA5B | 209 | KCND3 | 349 | SENP7 |
| 70 | CA6 | 210 | KCNK2 | 350 | SENP8 |
| 71 | CA7 | 211 | KDM4E | 351 | SERPINA6 |
| 72 | CA9 | 212 | KDR | 352 | SGK1 |
| 73 | CAMK2B | 213 | KLRB1A | 353 | SHBG |
| 74 | CASP3 | 214 | LARS | 354 | SI |
| 75 | CASP6 | 215 | LCK | 355 | SIGMAR1 |
| 76 | CBR1 | 216 | LDHB | 356 | SIRT1 |
| 77 | CBS | 217 | LGALS1 | 357 | SKA |
| 78 | CCNB1 | 218 | LGALS3 | 358 | SLC16A7 |
| 79 | CCNB2 | 219 | LGALS4 | 359 | SLC28A2 |
| 80 | CCNB3 | 220 | LGALS7 | 360 | SLC28A3 |
| 81 | CD22 | 221 | LGALS7B | 361 | SLC37A4 |
| 82 | CD38 | 222 | LGALS8 | 362 | SLC5A1 |
| 83 | CD69 | 223 | LGALS9 | 363 | SLC5A11 |
| 84 | CD81 | 224 | LIMK1 | 364 | SLC5A2 |
| 85 | CDA | 225 | LPO | 365 | SLC5A4 |
| 86 | CDC25A | 226 | LTB4R | 366 | SLC6A3 |
| 87 | CDC25B | 227 | MAG | 367 | SLC6A4 |
| 88 | CDK1 | 228 | MAOA | 368 | SLCO1A1 |
| 89 | CDK2 | 229 | MAOB | 369 | SLCO1B1 |
| 90 | CDK5 | 230 | MAPK3 | 370 | SLCO1B2 |
| 91 | CDK5R1 | 231 | MAPT | 371 | SMAD3 |
| 92 | CDK6 | 232 | MCL1 | 372 | SMARCA2 |
| 93 | CELA1 | 233 | MDH | 373 | SOAT1 |
| 94 | CES1 | 234 | MDM2 | 374 | SOAT2 |
| 95 | CES2 | 235 | MEP2 | 375 | SRC |
| 96 | CFTR | 236 | MET | 376 | SRD5A1 |
| 97 | CHEK1 | 237 | MEX-5 | 377 | SSSIM |
| 98 | CHIA | 238 | MGAM | 378 | ST3GAL3 |
| 99 | CHRM2 | 239 | MGMT | 379 | ST6GAL1 |
| 100 | CNR1 | 240 | MIF | 380 | SYK |
| 101 | CREB1 | 241 | MITF | 381 | SYN1 |
| 102 | CSNK2A1 | 242 | MMP1 | 382 | TAS2R31 |
| 103 | CTS1 | 243 | MMP12 | 383 | TCF4 |
| 104 | CXCL12 | 244 | MMP13 | 384 | TDO2 |
| 105 | CXCR1 | 245 | MMP2 | 385 | TDP1 |
| 106 | CYA | 246 | MMP3 | 386 | TDP2 |
| 107 | CYP11B1 | 247 | MMP7 | 387 | TERT |
| 108 | CYP11B2 | 248 | MMP8 | 388 | THYA |
| 109 | CYP17A1 | 249 | MMP9 | 389 | TLK1 |
| 110 | CYP19A1 | 250 | MPG | 390 | TLR1 |
| 111 | CYP1A1 | 251 | MPO | 391 | TLR2 |
| 112 | CYP1B1 | 252 | MSRA | 392 | TLR4 |
| 113 | CYP2C19 | 253 | MTCA2 | 393 | TMIGD3 |
| 114 | CYP2C8 | 254 | MYLK | 394 | TNF |
| 115 | CYP51A1 | 255 | N1L | 395 | TNFRSF1A |
| 116 | DAPK1 | 256 | NANA | 396 | TNKS |
| 117 | DDL | 257 | NANH | 397 | TNKS2 |
| 118 | DNAB | 258 | NAT2 | 398 | TOP1 |
| 119 | DNMT3A | 259 | NCOA3 | 399 | TOP2A |
| 120 | DNMT3L | 260 | NEK2 | 400 | TPH1 |
| 121 | DRD4 | 261 | NEK6 | 401 | TRPA1 |
| 122 | DUSP1 | 262 | NEU4 | 402 | TTR |
| 123 | DUSP3 | 263 | NFE2L2 | 403 | TUBB1 |
| 124 | DYRK1A | 264 | NFKB1 | 404 | TUBB2B |
| 125 | E6 | 265 | NMUR2 | 405 | TYR |
| 126 | EGFR | 266 | NOS2 | 406 | UBA2 |
| 127 | ELANE | 267 | NOX4 | 407 | USP7 |
| 128 | ELAVL1 | 268 | NPC1L1 | 408 | VARS |
| 129 | ELAVL3 | 269 | NQO1 | 409 | VEGFA |
| 130 | ENGASE | 270 | NQO2 | 410 | V-FPS |
| 131 | ENTPD2 | 271 | NR1H3 | 411 | XDH |
| 132 | ENTPD3 | 272 | NR1H4 | 412 | YARS |
| 133 | EPHX2 | 273 | NR1I3 | 413 | YARS1 |
| 134 | ERAP1 | 274 | NR3C1 |  |  |
| 135 | ERN1 | 275 | NR3C2 |  |  |
| 136 | ESR1 | 276 | NSD2 |  |  |
| 137 | ESR2 | 277 | NT5E |  |  |
| 138 | F2 | 278 | NUAK1 |  |  |
| 139 | F3 | 279 | ODC1 |  |  |
| 140 | FAAH | 280 | OPRD1A |  |  |

**Table S2**. Totally 12907 therapeutic targets acting on liver injury

| No. | Gene Symbol | No. | Gene Symbol | No. | Gene Symbol | No. | Gene Symbol |
| --- | --- | --- | --- | --- | --- | --- | --- |
| 1 | A1BG | 3301 | ELANE | 6601 | MIR203A | 9901 | SAMD8 |
| 2 | A2M | 3302 | ELAVL1 | 6602 | MIR204 | 9902 | SAMD9L |
| 3 | A2ML1 | 3303 | ELAVL2 | 6603 | MIR205 | 9903 | SAMHD1 |
| 4 | A4GALT | 3304 | ELAVL4 | 6604 | MIR206 | 9904 | SAMM50 |
| 5 | AAAS | 3305 | ELF1 | 6605 | MIR208A | 9905 | SAP130 |
| 6 | AACS | 3306 | ELF2 | 6606 | MIR208B | 9906 | SAP18 |
| 7 | AADAC | 3307 | ELF3 | 6607 | MIR20A | 9907 | SAP30 |
| 8 | AAGAB | 3308 | ELF4 | 6608 | MIR20B | 9908 | SAP30BP |
| 9 | AAK1 | 3309 | ELFN1 | 6609 | MIR21 | 9909 | SAR1A |
| 10 | AAMP | 3310 | ELK1 | 6610 | MIR210 | 9910 | SAR1B |
| 11 | AANAT | 3311 | ELK3 | 6611 | MIR211 | 9911 | SARAF |
| 12 | AARS1 | 3312 | ELK4 | 6612 | MIR212 | 9912 | SARDH |
| 13 | AARS2 | 3313 | ELL | 6613 | MIR214 | 9913 | SARM1 |
| 14 | AASDHPPT | 3314 | ELL2 | 6614 | MIR215 | 9914 | SARNP |
| 15 | AASS | 3315 | ELL3 | 6615 | MIR216A | 9915 | SARS1 |
| 16 | AATF | 3316 | ELMO1 | 6616 | MIR217 | 9916 | SARS2 |
| 17 | AATK | 3317 | ELMO2 | 6617 | MIR218-1 | 9917 | SART1 |
| 18 | AAVS1 | 3318 | ELMOD1 | 6618 | MIR219A1 | 9918 | SART3 |
| 19 | ABAT | 3319 | ELMOD2 | 6619 | MIR219A2 | 9919 | SASH1 |
| 20 | ABCA1 | 3320 | ELN | 6620 | MIR22 | 9920 | SASS6 |
| 21 | ABCA12 | 3321 | ELOA | 6621 | MIR221 | 9921 | SAT1 |
| 22 | ABCA2 | 3322 | ELOB | 6622 | MIR222 | 9922 | SATB1 |
| 23 | ABCA3 | 3323 | ELOC | 6623 | MIR223 | 9923 | SATB2 |
| 24 | ABCA4 | 3324 | ELOF1 | 6624 | MIR224 | 9924 | SAV1 |
| 25 | ABCA7 | 3325 | ELOVL1 | 6625 | MIR22HG | 9925 | SBDS |
| 26 | ABCB1 | 3326 | ELOVL4 | 6626 | MIR23A | 9926 | SBF1 |
| 27 | ABCB10 | 3327 | ELOVL5 | 6627 | MIR23B | 9927 | SBF2 |
| 28 | ABCB11 | 3328 | ELOVL6 | 6628 | MIR24-1 | 9928 | SBF2-AS1 |
| 29 | ABCB4 | 3329 | ELP1 | 6629 | MIR24-2 | 9929 | SBNO1 |
| 30 | ABCB6 | 3330 | ELP2 | 6630 | MIR25 | 9930 | SBNO2 |
| 31 | ABCB7 | 3331 | ELP3 | 6631 | MIR26A1 | 9931 | SBSN |
| 32 | ABCB8 | 3332 | ELP4 | 6632 | MIR26A2 | 9932 | SC5D |
| 33 | ABCB9 | 3333 | ELP5 | 6633 | MIR26B | 9933 | SCAF1 |
| 34 | ABCC1 | 3334 | ELP6 | 6634 | MIR27A | 9934 | SCAF11 |
| 35 | ABCC10 | 3335 | ELSPBP1 | 6635 | MIR27B | 9935 | SCAF4 |
| 36 | ABCC11 | 3336 | EMB | 6636 | MIR28 | 9936 | SCAF8 |
| 37 | ABCC12 | 3337 | EMC1 | 6637 | MIR296 | 9937 | SCAMP1 |
| 38 | ABCC2 | 3338 | EMC10 | 6638 | MIR298 | 9938 | SCAMP2 |
| 39 | ABCC3 | 3339 | EMC3 | 6639 | MIR299 | 9939 | SCAMP3 |
| 40 | ABCC4 | 3340 | EMC4 | 6640 | MIR29A | 9940 | SCAP |
| 41 | ABCC5 | 3341 | EMC7 | 6641 | MIR29B1 | 9941 | SCARA3 |
| 42 | ABCC6 | 3342 | EMC8 | 6642 | MIR29B2 | 9942 | SCARA5 |
| 43 | ABCC8 | 3343 | EMD | 6643 | MIR29C | 9943 | SCARB1 |
| 44 | ABCC9 | 3344 | EME1 | 6644 | MIR300 | 9944 | SCARB2 |
| 45 | ABCD1 | 3345 | EME2 | 6645 | MIR301A | 9945 | SCARF1 |
| 46 | ABCD2 | 3346 | EMG1 | 6646 | MIR301B | 9946 | SCARNA14 |
| 47 | ABCD3 | 3347 | EMID1 | 6647 | MIR302A | 9947 | SCART1 |
| 48 | ABCD4 | 3348 | EMILIN1 | 6648 | MIR302B | 9948 | SCCPDH |
| 49 | ABCE1 | 3349 | EMILIN3 | 6649 | MIR302C | 9949 | SCD |
| 50 | ABCF1 | 3350 | EML1 | 6650 | MIR30A | 9950 | SCD5 |
| 51 | ABCF2 | 3351 | EML3 | 6651 | MIR30B | 9951 | SCFD1 |
| 52 | ABCG1 | 3352 | EML4 | 6652 | MIR30C1 | 9952 | SCG2 |
| 53 | ABCG2 | 3353 | EMP1 | 6653 | MIR30C2 | 9953 | SCG3 |
| 54 | ABCG5 | 3354 | EMP2 | 6654 | MIR30D | 9954 | SCG5 |
| 55 | ABCG8 | 3355 | EMP3 | 6655 | MIR30E | 9955 | SCGB1A1 |
| 56 | ABHD10 | 3356 | EMSY | 6656 | MIR31 | 9956 | SCGB1C1 |
| 57 | ABHD12 | 3357 | EMX2 | 6657 | MIR32 | 9957 | SCGB1D1 |
| 58 | ABHD14B | 3358 | EN1 | 6658 | MIR320A | 9958 | SCGB1D2 |
| 59 | ABHD16A | 3359 | EN2 | 6659 | MIR320B1 | 9959 | SCGB2A1 |
| 60 | ABHD5 | 3360 | ENAH | 6660 | MIR320B2 | 9960 | SCGB2A2 |
| 61 | ABHD6 | 3361 | ENC1 | 6661 | MIR323A | 9961 | SCGB2B2 |
| 62 | ABI1 | 3362 | ENDOD1 | 6662 | MIR324 | 9962 | SCGB3A1 |
| 63 | ABI3 | 3363 | ENDOG | 6663 | MIR325 | 9963 | SCGN |
| 64 | ABI3BP | 3364 | ENDOV | 6664 | MIR326 | 9964 | SCHIP1 |
| 65 | ABITRAM | 3365 | ENG | 6665 | MIR328 | 9965 | SCHLAP1 |
| 66 | ABL1 | 3366 | ENGASE | 6666 | MIR330 | 9966 | SCIN |
| 67 | ABL2 | 3367 | ENHO | 6667 | MIR331 | 9967 | SCLT1 |
| 68 | ABLIM1 | 3368 | ENKUR | 6668 | MIR335 | 9968 | SCLY |
| 69 | ABLIM3 | 3369 | ENO1 | 6669 | MIR337 | 9969 | SCMH1 |
| 70 | ABO | 3370 | ENO2 | 6670 | MIR338 | 9970 | SCML2 |
| 71 | ABR | 3371 | ENO3 | 6671 | MIR339 | 9971 | SCN11A |
| 72 | ABRA | 3372 | ENOPH1 | 6672 | MIR33A | 9972 | SCN1A |
| 73 | ABRAXAS1 | 3373 | ENOX2 | 6673 | MIR33B | 9973 | SCN1B |
| 74 | ABRAXAS2 | 3374 | ENPEP | 6674 | MIR340 | 9974 | SCN2A |
| 75 | ABT1 | 3375 | ENPP1 | 6675 | MIR342 | 9975 | SCN2B |
| 76 | ABTB2 | 3376 | ENPP2 | 6676 | MIR345 | 9976 | SCN3A |
| 77 | ACAA1 | 3377 | ENPP3 | 6677 | MIR346 | 9977 | SCN3B |
| 78 | ACAA2 | 3378 | ENPP4 | 6678 | MIR34A | 9978 | SCN4A |
| 79 | ACACA | 3379 | ENPP6 | 6679 | MIR34AHG | 9979 | SCN4B |
| 80 | ACACB | 3380 | ENSA | 6680 | MIR34B | 9980 | SCN5A |
| 81 | ACAD11 | 3381 | ENTPD1 | 6681 | MIR34C | 9981 | SCN7A |
| 82 | ACAD8 | 3382 | ENTPD2 | 6682 | MIR361 | 9982 | SCN8A |
| 83 | ACAD9 | 3383 | ENTPD3 | 6683 | MIR362 | 9983 | SCN9A |
| 84 | ACADL | 3384 | ENTPD4 | 6684 | MIR363 | 9984 | SCNM1 |
| 85 | ACADM | 3385 | ENTPD7 | 6685 | MIR3651 | 9985 | SCNN1A |
| 86 | ACADS | 3386 | ENTR1 | 6686 | MIR365A | 9986 | SCNN1B |
| 87 | ACADSB | 3387 | ENY2 | 6687 | MIR370 | 9987 | SCNN1D |
| 88 | ACADVL | 3388 | EOGT | 6688 | MIR371A | 9988 | SCNN1G |
| 89 | ACAN | 3389 | EOLA1 | 6689 | MIR372 | 9989 | SCO1 |
| 90 | ACAP2 | 3390 | EOMES | 6690 | MIR373 | 9990 | SCO2 |
| 91 | ACAP3 | 3391 | EP300 | 6691 | MIR374A | 9991 | SCP2 |
| 92 | ACAT1 | 3392 | EP400 | 6692 | MIR374B | 9992 | SCPEP1 |
| 93 | ACAT2 | 3393 | EPAS1 | 6693 | MIR375 | 9993 | SCRG1 |
| 94 | ACBD3 | 3394 | EPB41 | 6694 | MIR376A1 | 9994 | SCRIB |
| 95 | ACBD5 | 3395 | EPB41L1 | 6695 | MIR376B | 9995 | SCT |
| 96 | ACD | 3396 | EPB41L2 | 6696 | MIR376C | 9996 | SCTR |
| 97 | ACE | 3397 | EPB41L3 | 6697 | MIR377 | 9997 | SCUBE1 |
| 98 | ACE2 | 3398 | EPB41L5 | 6698 | MIR378A | 9998 | SCUBE2 |
| 99 | ACER2 | 3399 | EPB42 | 6699 | MIR379 | 9999 | SCUBE3 |
| 100 | ACER3 | 3400 | EPC1 | 6700 | MIR381 | 10000 | SCYL1 |
| 101 | ACHE | 3401 | EPC2 | 6701 | MIR382 | 10001 | SCYL2 |
| 102 | ACIN1 | 3402 | EPCAM | 6702 | MIR383 | 10002 | SCYL3 |
| 103 | ACKR1 | 3403 | EPG5 | 6703 | MIR3928 | 10003 | SDAD1 |
| 104 | ACKR2 | 3404 | EPGN | 6704 | MIR409 | 10004 | SDC1 |
| 105 | ACKR3 | 3405 | EPHA1 | 6705 | MIR410 | 10005 | SDC2 |
| 106 | ACLY | 3406 | EPHA2 | 6706 | MIR411 | 10006 | SDC3 |
| 107 | ACMSD | 3407 | EPHA3 | 6707 | MIR421 | 10007 | SDC4 |
| 108 | ACO1 | 3408 | EPHA4 | 6708 | MIR422A | 10008 | SDCBP |
| 109 | ACO2 | 3409 | EPHA5 | 6709 | MIR423 | 10009 | SDCCAG8 |
| 110 | ACOT11 | 3410 | EPHA6 | 6710 | MIR424 | 10010 | SDE2 |
| 111 | ACOT12 | 3411 | EPHA7 | 6711 | MIR4262 | 10011 | SDF2L1 |
| 112 | ACOT13 | 3412 | EPHA8 | 6712 | MIR429 | 10012 | SDF4 |
| 113 | ACOT7 | 3413 | EPHB1 | 6713 | MIR432 | 10013 | SDHA |
| 114 | ACOT8 | 3414 | EPHB2 | 6714 | MIR433 | 10014 | SDHAF1 |
| 115 | ACOT9 | 3415 | EPHB3 | 6715 | MIR44352HG | 10015 | SDHAF2 |
| 116 | ACOX1 | 3416 | EPHB4 | 6716 | MIR449A | 10016 | SDHAF3 |
| 117 | ACOX2 | 3417 | EPHB6 | 6717 | MIR451A | 10017 | SDHB |
| 118 | ACP1 | 3418 | EPHX1 | 6718 | MIR454 | 10018 | SDHC |
| 119 | ACP2 | 3419 | EPHX2 | 6719 | MIR455 | 10019 | SDHD |
| 120 | ACP3 | 3420 | EPHX3 | 6720 | MIR466 | 10020 | SDK2 |
| 121 | ACP4 | 3421 | EPM2A | 6721 | MIR4660 | 10021 | SDR42E1 |
| 122 | ACP5 | 3422 | EPM2AIP1 | 6722 | MIR4668 | 10022 | SDR9C7 |
| 123 | ACP6 | 3423 | EPN1 | 6723 | MIR4709 | 10023 | SDS |
| 124 | ACR | 3424 | EPN2 | 6724 | MIR483 | 10024 | SDSL |
| 125 | ACRV1 | 3425 | EPN3 | 6725 | MIR484 | 10025 | SEBOX |
| 126 | ACSF3 | 3426 | EPO | 6726 | MIR485 | 10026 | SEC11A |
| 127 | ACSL1 | 3427 | EPOR | 6727 | MIR486-1 | 10027 | SEC13 |
| 128 | ACSL3 | 3428 | EPPIN | 6728 | MIR487B | 10028 | SEC14L1 |
| 129 | ACSL4 | 3429 | EPPK1 | 6729 | MIR489 | 10029 | SEC14L2 |
| 130 | ACSL5 | 3430 | EPRS1 | 6730 | MIR490 | 10030 | SEC14L3 |
| 131 | ACSL6 | 3431 | EPS15 | 6731 | MIR491 | 10031 | SEC14L5 |
| 132 | ACSM3 | 3432 | EPS15L1 | 6732 | MIR493 | 10032 | SEC16A |
| 133 | ACSS1 | 3433 | EPS8 | 6733 | MIR494 | 10033 | SEC22B |
| 134 | ACSS2 | 3434 | EPS8L1 | 6734 | MIR495 | 10034 | SEC22C |
| 135 | ACTA1 | 3435 | EPS8L2 | 6735 | MIR497 | 10035 | SEC23A |
| 136 | ACTA2 | 3436 | EPSTI1 | 6736 | MIR498 | 10036 | SEC23B |
| 137 | ACTB | 3437 | EPX | 6737 | MIR499A | 10037 | SEC23IP |
| 138 | ACTBL2 | 3438 | ERAL1 | 6738 | MIR500A | 10038 | SEC24A |
| 139 | ACTC1 | 3439 | ERAP1 | 6739 | MIR5011 | 10039 | SEC24B |
| 140 | ACTG1 | 3440 | ERAP2 | 6740 | MIR503 | 10040 | SEC24C |
| 141 | ACTG2 | 3441 | ERAS | 6741 | MIR504 | 10041 | SEC24D |
| 142 | ACTL6A | 3442 | ERBB2 | 6742 | MIR505 | 10042 | SEC31A |
| 143 | ACTL6B | 3443 | ERBB3 | 6743 | MIR506 | 10043 | SEC61A1 |
| 144 | ACTN1 | 3444 | ERBB4 | 6744 | MIR508 | 10044 | SEC61B |
| 145 | ACTN2 | 3445 | ERBIN | 6745 | MIR509-1 | 10045 | SEC61G |
| 146 | ACTN3 | 3446 | ERC1 | 6746 | MIR509-3 | 10046 | SEC62 |
| 147 | ACTN4 | 3447 | ERCC1 | 6747 | MIR511 | 10047 | SEC63 |
| 148 | ACTR10 | 3448 | ERCC2 | 6748 | MIR517A | 10048 | SECISBP2 |
| 149 | ACTR1A | 3449 | ERCC3 | 6749 | MIR518A1 | 10049 | SEH1L |
| 150 | ACTR1B | 3450 | ERCC4 | 6750 | MIR5193 | 10050 | SEL1L |
| 151 | ACTR2 | 3451 | ERCC5 | 6751 | MIR519A1 | 10051 | SELE |
| 152 | ACTR3 | 3452 | ERCC6 | 6752 | MIR519D | 10052 | SELENBP1 |
| 153 | ACTR3B | 3453 | ERCC6L | 6753 | MIR520A | 10053 | SELENOF |
| 154 | ACTR5 | 3454 | ERCC6L2 | 6754 | MIR520B | 10054 | SELENOH |
| 155 | ACTRT1 | 3455 | ERCC8 | 6755 | MIR520D | 10055 | SELENOI |
| 156 | ACTRT2 | 3456 | EREG | 6756 | MIR521-1 | 10056 | SELENOK |
| 157 | ACVR1 | 3457 | ERF | 6757 | MIR532 | 10057 | SELENOM |
| 158 | ACVR1B | 3458 | ERFE | 6758 | MIR542 | 10058 | SELENON |
| 159 | ACVR2A | 3459 | ERG | 6759 | MIR544A | 10059 | SELENOP |
| 160 | ACVR2B | 3460 | ERGIC1 | 6760 | MIR548AW | 10060 | SELENOS |
| 161 | ACVRL1 | 3461 | ERGIC2 | 6761 | MIR548C | 10061 | SELENOW |
| 162 | ACY1 | 3462 | ERGIC3 | 6762 | MIR551A | 10062 | SELL |
| 163 | ACY3 | 3463 | ERH | 6763 | MIR551B | 10063 | SELP |
| 164 | ACYP1 | 3464 | ERLEC1 | 6764 | MIR572 | 10064 | SELPLG |
| 165 | ADA | 3465 | ERLIN1 | 6765 | MIR574 | 10065 | SEM1 |
| 166 | ADA2 | 3466 | ERLIN2 | 6766 | MIR575 | 10066 | SEMA3A |
| 167 | ADAD1 | 3467 | ERMP1 | 6767 | MIR582 | 10067 | SEMA3B |
| 168 | ADAM10 | 3468 | ERN1 | 6768 | MIR584 | 10068 | SEMA3C |
| 169 | ADAM11 | 3469 | ERN2 | 6769 | MIR590 | 10069 | SEMA3E |
| 170 | ADAM12 | 3470 | ERO1A | 6770 | MIR600 | 10070 | SEMA3F |
| 171 | ADAM15 | 3471 | ERO1B | 6771 | MIR601 | 10071 | SEMA4A |
| 172 | ADAM17 | 3472 | ERP29 | 6772 | MIR602 | 10072 | SEMA4C |
| 173 | ADAM19 | 3473 | ERP44 | 6773 | MIR608 | 10073 | SEMA4D |
| 174 | ADAM22 | 3474 | ERRFI1 | 6774 | MIR6090 | 10074 | SEMA4F |
| 175 | ADAM28 | 3475 | ERVK-6 | 6775 | MIR612 | 10075 | SEMA4G |
| 176 | ADAM33 | 3476 | ERVMER34-1 | 6776 | MIR613 | 10076 | SEMA5A |
| 177 | ADAM3A | 3477 | ERVW-1 | 6777 | MIR615 | 10077 | SEMA6A |
| 178 | ADAM8 | 3478 | ESAM | 6778 | MIR622 | 10078 | SEMA6B |
| 179 | ADAM9 | 3479 | ESCO1 | 6779 | MIR625 | 10079 | SEMA6C |
| 180 | ADAMDEC1 | 3480 | ESCO2 | 6780 | MIR628 | 10080 | SEMA6D |
| 181 | ADAMTS1 | 3481 | ESD | 6781 | MIR630 | 10081 | SEMA7A |
| 182 | ADAMTS10 | 3482 | ESF1 | 6782 | MIR634 | 10082 | SEMG2 |
| 183 | ADAMTS12 | 3483 | ESM1 | 6783 | MIR637 | 10083 | SENP1 |
| 184 | ADAMTS13 | 3484 | ESPL1 | 6784 | MIR638 | 10084 | SENP2 |
| 185 | ADAMTS14 | 3485 | ESPN | 6785 | MIR642A | 10085 | SENP3 |
| 186 | ADAMTS15 | 3486 | ESPNL | 6786 | MIR646 | 10086 | SENP6 |
| 187 | ADAMTS17 | 3487 | ESR1 | 6787 | MIR650 | 10087 | SENP7 |
| 188 | ADAMTS19 | 3488 | ESR2 | 6788 | MIR654 | 10088 | SENP8 |
| 189 | ADAMTS2 | 3489 | ESRP1 | 6789 | MIR657 | 10089 | SEPHS1 |
| 190 | ADAMTS20 | 3490 | ESRP2 | 6790 | MIR663A | 10090 | SEPHS2 |
| 191 | ADAMTS3 | 3491 | ESRRA | 6791 | MIR671 | 10091 | SEPSECS |
| 192 | ADAMTS4 | 3492 | ESRRB | 6792 | MIR675 | 10092 | SEPT5-GP1BB |
| 193 | ADAMTS5 | 3493 | ESS2 | 6793 | MIR6758 | 10093 | SEPTIN1 |
| 194 | ADAMTS7 | 3494 | ESX1 | 6794 | MIR708 | 10094 | SEPTIN11 |
| 195 | ADAMTS9 | 3495 | ESYT1 | 6795 | MIR7-1 | 10095 | SEPTIN2 |
| 196 | ADAMTSL1 | 3496 | ESYT2 | 6796 | MIR7-3 | 10096 | SEPTIN3 |
| 197 | ADAMTSL4 | 3497 | ETAA1 | 6797 | MIR7-3HG | 10097 | SEPTIN4 |
| 198 | ADAR | 3498 | ETF1 | 6798 | MIR758 | 10098 | SEPTIN5 |
| 199 | ADARB1 | 3499 | ETFA | 6799 | MIR766 | 10099 | SEPTIN6 |
| 200 | ADARB2 | 3500 | ETFB | 6800 | MIR769 | 10100 | SEPTIN7 |
| 201 | ADAT2 | 3501 | ETFDH | 6801 | MIR802 | 10101 | SEPTIN8 |
| 202 | ADAT3 | 3502 | ETFRF1 | 6802 | MIR873 | 10102 | SEPTIN9 |
| 203 | ADCK1 | 3503 | ETHE1 | 6803 | MIR874 | 10103 | SERAC1 |
| 204 | ADCK2 | 3504 | ETM2 | 6804 | MIR877 | 10104 | SERBP1 |
| 205 | ADCY1 | 3505 | ETNK2 | 6805 | MIR9-1 | 10105 | SERF1B |
| 206 | ADCY10 | 3506 | ETS1 | 6806 | MIR9-2 | 10106 | SERGEF |
| 207 | ADCY2 | 3507 | ETS1-AS1 | 6807 | MIR92A1 | 10107 | SERINC1 |
| 208 | ADCY3 | 3508 | ETS2 | 6808 | MIR92A2 | 10108 | SERINC3 |
| 209 | ADCY4 | 3509 | ETV1 | 6809 | MIR92B | 10109 | SERPINA1 |
| 210 | ADCY5 | 3510 | ETV2 | 6810 | MIR93 | 10110 | SERPINA10 |
| 211 | ADCY6 | 3511 | ETV3 | 6811 | MIR940 | 10111 | SERPINA11 |
| 212 | ADCY7 | 3512 | ETV4 | 6812 | MIR942 | 10112 | SERPINA12 |
| 213 | ADCY8 | 3513 | ETV5 | 6813 | MIR95 | 10113 | SERPINA2 |
| 214 | ADCY9 | 3514 | ETV6 | 6814 | MIR96 | 10114 | SERPINA3 |
| 215 | ADCYAP1 | 3515 | ETV7 | 6815 | MIR98 | 10115 | SERPINA4 |
| 216 | ADCYAP1R1 | 3516 | EVA1A | 6816 | MIR99A | 10116 | SERPINA5 |
| 217 | ADD1 | 3517 | EVA1B | 6817 | MIR99AHG | 10117 | SERPINA6 |
| 218 | ADD2 | 3518 | EVC | 6818 | MIR99B | 10118 | SERPINA7 |
| 219 | ADD3 | 3519 | EVC2 | 6819 | MIRLET7A1 | 10119 | SERPINB1 |
| 220 | ADD3-AS1 | 3520 | EVI2A | 6820 | MIRLET7A2 | 10120 | SERPINB10 |
| 221 | ADGRA3 | 3521 | EVI5 | 6821 | MIRLET7A3 | 10121 | SERPINB12 |
| 222 | ADGRB1 | 3522 | EVL | 6822 | MIRLET7B | 10122 | SERPINB13 |
| 223 | ADGRE1 | 3523 | EVPL | 6823 | MIRLET7C | 10123 | SERPINB2 |
| 224 | ADGRE5 | 3524 | EWSR1 | 6824 | MIRLET7D | 10124 | SERPINB3 |
| 225 | ADGRG1 | 3525 | EXO1 | 6825 | MIRLET7E | 10125 | SERPINB4 |
| 226 | ADGRG6 | 3526 | EXO5 | 6826 | MIRLET7F1 | 10126 | SERPINB5 |
| 227 | ADGRL2 | 3527 | EXOC1 | 6827 | MIRLET7F2 | 10127 | SERPINB6 |
| 228 | ADGRL4 | 3528 | EXOC2 | 6828 | MIRLET7G | 10128 | SERPINB7 |
| 229 | ADGRV1 | 3529 | EXOC3 | 6829 | MIRLET7I | 10129 | SERPINB8 |
| 230 | ADH1A | 3530 | EXOC3L2 | 6830 | MIS18A | 10130 | SERPINB9 |
| 231 | ADH1B | 3531 | EXOC3L4 | 6831 | MIS18BP1 | 10131 | SERPINC1 |
| 232 | ADH1C | 3532 | EXOC4 | 6832 | MISP | 10132 | SERPIND1 |
| 233 | ADH4 | 3533 | EXOC5 | 6833 | MITD1 | 10133 | SERPINE1 |
| 234 | ADH5 | 3534 | EXOC6 | 6834 | MITF | 10134 | SERPINE2 |
| 235 | ADH6 | 3535 | EXOC7 | 6835 | MKI67 | 10135 | SERPINF1 |
| 236 | ADH7 | 3536 | EXOSC1 | 6836 | MKKS | 10136 | SERPINF2 |
| 237 | ADHFE1 | 3537 | EXOSC10 | 6837 | MKNK1 | 10137 | SERPING1 |
| 238 | ADI1 | 3538 | EXOSC2 | 6838 | MKNK2 | 10138 | SERPINH1 |
| 239 | ADIPOQ | 3539 | EXOSC3 | 6839 | MKRN1 | 10139 | SERPINI1 |
| 240 | ADIPOR1 | 3540 | EXOSC5 | 6840 | MKRN2 | 10140 | SERTAD1 |
| 241 | ADIPOR2 | 3541 | EXOSC6 | 6841 | MKRN3 | 10141 | SESN1 |
| 242 | ADIRF | 3542 | EXOSC8 | 6842 | MKS1 | 10142 | SESN2 |
| 243 | ADK | 3543 | EXOSC9 | 6843 | MKX | 10143 | SESN3 |
| 244 | ADM | 3544 | EXPH5 | 6844 | MLANA | 10144 | SET |
| 245 | ADM2 | 3545 | EXT1 | 6845 | MLC1 | 10145 | SETBP1 |
| 246 | ADM5 | 3546 | EXT2 | 6846 | MLEC | 10146 | SETD1A |
| 247 | ADNP | 3547 | EXTL1 | 6847 | MLF1 | 10147 | SETD1B |
| 248 | ADNP2 | 3548 | EXTL2 | 6848 | MLF2 | 10148 | SETD2 |
| 249 | ADORA1 | 3549 | EXTL3 | 6849 | MLH1 | 10149 | SETD3 |
| 250 | ADORA2A | 3550 | EYA1 | 6850 | MLH3 | 10150 | SETD5 |
| 251 | ADORA2B | 3551 | EYA2 | 6851 | MLIP | 10151 | SETD7 |
| 252 | ADORA3 | 3552 | EYA3 | 6852 | MLKL | 10152 | SETDB1 |
| 253 | ADPRH | 3553 | EYA4 | 6853 | MLLT1 | 10153 | SETMAR |
| 254 | ADPRM | 3554 | EYS | 6854 | MLLT10 | 10154 | SETX |
| 255 | ADPRS | 3555 | EZH1 | 6855 | MLLT11 | 10155 | SEZ6L |
| 256 | ADRA1A | 3556 | EZH2 | 6856 | MLLT3 | 10156 | SF1 |
| 257 | ADRA1B | 3557 | EZR | 6857 | MLN | 10157 | SF3A1 |
| 258 | ADRA1D | 3558 | F10 | 6858 | MLPH | 10158 | SF3A2 |
| 259 | ADRA2A | 3559 | F10-AS1 | 6859 | MLST8 | 10159 | SF3A3 |
| 260 | ADRA2B | 3560 | F11 | 6860 | MLX | 10160 | SF3B1 |
| 261 | ADRA2C | 3561 | F11-AS1 | 6861 | MLXIP | 10161 | SF3B2 |
| 262 | ADRB1 | 3562 | F11R | 6862 | MLXIPL | 10162 | SF3B3 |
| 263 | ADRB2 | 3563 | F12 | 6863 | MLYCD | 10163 | SF3B4 |
| 264 | ADRB3 | 3564 | F13A1 | 6864 | MMAA | 10164 | SF3B5 |
| 265 | ADRM1 | 3565 | F13B | 6865 | MMAB | 10165 | SFMBT1 |
| 266 | ADSL | 3566 | F2 | 6866 | MMACHC | 10166 | SFN |
| 267 | ADSS1 | 3567 | F2R | 6867 | MMADHC | 10167 | SFPQ |
| 268 | ADTRP | 3568 | F2RL1 | 6868 | MMD | 10168 | SFRP1 |
| 269 | AEBP1 | 3569 | F2RL2 | 6869 | MME | 10169 | SFRP2 |
| 270 | AFAP1 | 3570 | F2RL3 | 6870 | MMEL1 | 10170 | SFRP4 |
| 271 | AFAP1-AS1 | 3571 | F3 | 6871 | MMP1 | 10171 | SFRP5 |
| 272 | AFAP1L2 | 3572 | F5 | 6872 | MMP10 | 10172 | SFSWAP |
| 273 | AFDN | 3573 | F7 | 6873 | MMP11 | 10173 | SFT2D3 |
| 274 | AFF1 | 3574 | F8 | 6874 | MMP12 | 10174 | SFTPA1 |
| 275 | AFF2 | 3575 | F8A1 | 6875 | MMP13 | 10175 | SFTPA2 |
| 276 | AFF3 | 3576 | F9 | 6876 | MMP14 | 10176 | SFTPB |
| 277 | AFF4 | 3577 | FA2H | 6877 | MMP15 | 10177 | SFTPC |
| 278 | AFG1L | 3578 | FAAH | 6878 | MMP16 | 10178 | SFTPD |
| 279 | AFG3L2 | 3579 | FAAH2 | 6879 | MMP17 | 10179 | SFXN1 |
| 280 | AFM | 3580 | FAAP100 | 6880 | MMP19 | 10180 | SFXN4 |
| 281 | AFMID | 3581 | FAAP20 | 6881 | MMP2 | 10181 | SFXN5 |
| 282 | AFP | 3582 | FAAP24 | 6882 | MMP21 | 10182 | SGCA |
| 283 | AFTPH | 3583 | FABP1 | 6883 | MMP23B | 10183 | SGCB |
| 284 | AGA | 3584 | FABP12 | 6884 | MMP25 | 10184 | SGCD |
| 285 | AGAP1 | 3585 | FABP2 | 6885 | MMP26 | 10185 | SGCE |
| 286 | AGAP11 | 3586 | FABP3 | 6886 | MMP28 | 10186 | SGCG |
| 287 | AGAP2 | 3587 | FABP3P2 | 6887 | MMP3 | 10187 | SGCZ |
| 288 | AGAP2-AS1 | 3588 | FABP4 | 6888 | MMP7 | 10188 | SGF29 |
| 289 | AGAP4 | 3589 | FABP5 | 6889 | MMP8 | 10189 | SGK1 |
| 290 | AGBL1 | 3590 | FABP6 | 6890 | MMP9 | 10190 | SGK2 |
| 291 | AGBL2 | 3591 | FABP7 | 6891 | MMRN1 | 10191 | SGK3 |
| 292 | AGBL4 | 3592 | FADD | 6892 | MMS22L | 10192 | SGMS1 |
| 293 | AGBL5 | 3593 | FADS1 | 6893 | MMUT | 10193 | SGO1 |
| 294 | AGER | 3594 | FADS2 | 6894 | MN1 | 10194 | SGO1-AS1 |
| 295 | AGFG1 | 3595 | FADS3 | 6895 | MN298114-200 | 10195 | SGPL1 |
| 296 | AGGF1 | 3596 | FAF1 | 6896 | MNAT1 | 10196 | SGPP1 |
| 297 | AGK | 3597 | FAF2 | 6897 | MNDA | 10197 | SGSH |
| 298 | AGL | 3598 | FAH | 6898 | MNS1 | 10198 | SGTA |
| 299 | AGMAT | 3599 | FAHD1 | 6899 | MNT | 10199 | SGTB |
| 300 | AGMO | 3600 | FAHD2A | 6900 | MNX1 | 10200 | SH2B1 |
| 301 | AGO1 | 3601 | FAHD2B | 6901 | MNX1-AS1 | 10201 | SH2B3 |
| 302 | AGO2 | 3602 | FAIM | 6902 | MOAP1 | 10202 | SH2D1A |
| 303 | AGO3 | 3603 | FAIM2 | 6903 | MOB1A | 10203 | SH2D2A |
| 304 | AGPAT1 | 3604 | FALEC | 6904 | MOB2 | 10204 | SH2D3A |
| 305 | AGPAT2 | 3605 | FAM107A | 6905 | MOB3B | 10205 | SH2D4A |
| 306 | AGPAT5 | 3606 | FAM110B | 6906 | MOB3C | 10206 | SH2D4B |
| 307 | AGPS | 3607 | FAM111A | 6907 | MOCOS | 10207 | SH3BP2 |
| 308 | AGR2 | 3608 | FAM111B | 6908 | MOCS1 | 10208 | SH3BP4 |
| 309 | AGR3 | 3609 | FAM114A1 | 6909 | MOCS2 | 10209 | SH3BP5 |
| 310 | AGRN | 3610 | FAM114A2 | 6910 | MOCS3 | 10210 | SH3BP5L |
| 311 | AGRP | 3611 | FAM117A | 6911 | MOG | 10211 | SH3GL1 |
| 312 | AGT | 3612 | FAM117B | 6912 | MOGS | 10212 | SH3GL2 |
| 313 | AGTPBP1 | 3613 | FAM118B | 6913 | MOK | 10213 | SH3GLB1 |
| 314 | AGTR1 | 3614 | FAM120A | 6914 | MON1A | 10214 | SH3GLB2 |
| 315 | AGTR2 | 3615 | FAM120B | 6915 | MON1B | 10215 | SH3KBP1 |
| 316 | AGTRAP | 3616 | FAM122A | 6916 | MON2 | 10216 | SH3PXD2A |
| 317 | AGXT | 3617 | FAM124B | 6917 | MORC2 | 10217 | SH3PXD2B |
| 318 | AGXT2 | 3618 | FAM126A | 6918 | MORC3 | 10218 | SH3RF1 |
| 319 | AHCTF1 | 3619 | FAM126B | 6919 | MORF4L1 | 10219 | SH3TC2 |
| 320 | AHCY | 3620 | FAM131B | 6920 | MORF4L2 | 10220 | SHANK1 |
| 321 | AHCYL1 | 3621 | FAM133B | 6921 | MOSPD2 | 10221 | SHANK2 |
| 322 | AHCYL2 | 3622 | FAM135A | 6922 | MOV10 | 10222 | SHANK3 |
| 323 | AHDC1 | 3623 | FAM136A | 6923 | MOXD1 | 10223 | SHARPIN |
| 324 | AHI1 | 3624 | FAM13A | 6924 | MPC1 | 10224 | SHB |
| 325 | AHNAK | 3625 | FAM13B | 6925 | MPDU1 | 10225 | SHBG |
| 326 | AHNAK2 | 3626 | FAM160B1 | 6926 | MPDZ | 10226 | SHC1 |
| 327 | AHR | 3627 | FAM161A | 6927 | MPEG1 | 10227 | SHCBP1 |
| 328 | AHRR | 3628 | FAM162A | 6928 | MPG | 10228 | SHF |
| 329 | AHSA1 | 3629 | FAM163A | 6929 | MPHOSPH10 | 10229 | SHH |
| 330 | AHSG | 3630 | FAM172A | 6930 | MPHOSPH6 | 10230 | SHISA5 |
| 331 | AHSP | 3631 | FAM174C | 6931 | MPHOSPH8 | 10231 | SHKBP1 |
| 332 | AICDA | 3632 | FAM183A | 6932 | MPHOSPH9 | 10232 | SHMT1 |
| 333 | AIF1 | 3633 | FAM184A | 6933 | MPI | 10233 | SHMT2 |
| 334 | AIFM1 | 3634 | FAM184B | 6934 | MPIG6B | 10234 | SHOC2 |
| 335 | AIFM2 | 3635 | FAM187A | 6935 | MPL | 10235 | SHOX |
| 336 | AIFM3 | 3636 | FAM189A2 | 6936 | MPLKIP | 10236 | SHOX2 |
| 337 | AIM2 | 3637 | FAM189B | 6937 | MPND | 10237 | SHPK |
| 338 | AIMP1 | 3638 | FAM20A | 6938 | MPO | 10238 | SHPRH |
| 339 | AIMP2 | 3639 | FAM20B | 6939 | MPP1 | 10239 | SHQ1 |
| 340 | AIP | 3640 | FAM20C | 6940 | MPP2 | 10240 | SHROOM1 |
| 341 | AIPL1 | 3641 | FAM210B | 6941 | MPP5 | 10241 | SHROOM2 |
| 342 | AIR | 3642 | FAM214A | 6942 | MPP7 | 10242 | SHROOM3 |
| 343 | AIRE | 3643 | FAM214B | 6943 | MPRIP | 10243 | SHROOM4 |
| 344 | AJAP1 | 3644 | FAM215A | 6944 | MPST | 10244 | SHTN1 |
| 345 | AJUBA | 3645 | FAM219B | 6945 | MPV17 | 10245 | SI |
| 346 | AK1 | 3646 | FAM234A | 6946 | MPV17L | 10246 | SIAE |
| 347 | AK2 | 3647 | FAM3A | 6947 | MPZ | 10247 | SIAH1 |
| 348 | AK5 | 3648 | FAM3B | 6948 | MPZL1 | 10248 | SIAH2 |
| 349 | AK6 | 3649 | FAM3C | 6949 | MPZL2 | 10249 | SIGIRR |
| 350 | AK7 | 3650 | FAM3D | 6950 | MR1 | 10250 | SIGLEC1 |
| 351 | AKAP1 | 3651 | FAM50A | 6951 | MRAP | 10251 | SIGLEC10 |
| 352 | AKAP11 | 3652 | FAM53B | 6952 | MRAP2 | 10252 | SIGLEC14 |
| 353 | AKAP12 | 3653 | FAM53C | 6953 | MRAS | 10253 | SIGLEC5 |
| 354 | AKAP13 | 3654 | FAM72A | 6954 | MRC1 | 10254 | SIGLEC7 |
| 355 | AKAP2 | 3655 | FAM83D | 6955 | MRC2 | 10255 | SIGLEC8 |
| 356 | AKAP3 | 3656 | FAM83H | 6956 | MRE11 | 10256 | SIGLEC9 |
| 357 | AKAP4 | 3657 | FAM86B3P | 6957 | MRFAP1 | 10257 | SIGMAR1 |
| 358 | AKAP7 | 3658 | FAM89B | 6958 | MRFAP1L1 | 10258 | SIK1 |
| 359 | AKAP8 | 3659 | FAM91A1 | 6959 | MRGBP | 10259 | SIK2 |
| 360 | AKAP8L | 3660 | FAM98A | 6960 | MRGPRX1 | 10260 | SIK3 |
| 361 | AKAP9 | 3661 | FAN1 | 6961 | MRGPRX2 | 10261 | SIKE1 |
| 362 | AKIP1 | 3662 | FANCA | 6962 | MRI1 | 10262 | SIL1 |
| 363 | AKIRIN2 | 3663 | FANCB | 6963 | MRM2 | 10263 | SIM1 |
| 364 | AKR1A1 | 3664 | FANCC | 6964 | MRM3 | 10264 | SIM2 |
| 365 | AKR1B1 | 3665 | FANCD2 | 6965 | MROH7 | 10265 | SIMC1 |
| 366 | AKR1B10 | 3666 | FANCD2OS | 6966 | MRPL10 | 10266 | SIN3A |
| 367 | AKR1C1 | 3667 | FANCE | 6967 | MRPL11 | 10267 | SIN3B |
| 368 | AKR1C2 | 3668 | FANCF | 6968 | MRPL13 | 10268 | SIPA1 |
| 369 | AKR1C3 | 3669 | FANCG | 6969 | MRPL14 | 10269 | SIPA1L1 |
| 370 | AKR1C4 | 3670 | FANCI | 6970 | MRPL15 | 10270 | SIPA1L2 |
| 371 | AKR1D1 | 3671 | FANCL | 6971 | MRPL16 | 10271 | SIPA1L3 |
| 372 | AKR1E2 | 3672 | FANCM | 6972 | MRPL17 | 10272 | SIRPA |
| 373 | AKR7A2 | 3673 | FAP | 6973 | MRPL18 | 10273 | SIRT1 |
| 374 | AKT1 | 3674 | FAR1 | 6974 | MRPL19 | 10274 | SIRT2 |
| 375 | AKT1S1 | 3675 | FAR2 | 6975 | MRPL22 | 10275 | SIRT3 |
| 376 | AKT2 | 3676 | FARP1 | 6976 | MRPL23 | 10276 | SIRT4 |
| 377 | AKT3 | 3677 | FARP2 | 6977 | MRPL24 | 10277 | SIRT5 |
| 378 | AKTIP | 3678 | FARS2 | 6978 | MRPL27 | 10278 | SIRT6 |
| 379 | ALAD | 3679 | FARSA | 6979 | MRPL28 | 10279 | SIRT7 |
| 380 | ALAS1 | 3680 | FARSB | 6980 | MRPL3 | 10280 | SIVA1 |
| 381 | ALAS2 | 3681 | FAS | 6981 | MRPL32 | 10281 | SIX1 |
| 382 | ALB | 3682 | FAS-AS1 | 6982 | MRPL33 | 10282 | SIX2 |
| 383 | ALCAM | 3683 | FASLG | 6983 | MRPL35 | 10283 | SIX3 |
| 384 | ALDH16A1 | 3684 | FASN | 6984 | MRPL36 | 10284 | SIX4 |
| 385 | ALDH18A1 | 3685 | FASTK | 6985 | MRPL37 | 10285 | SIX5 |
| 386 | ALDH1A1 | 3686 | FASTKD2 | 6986 | MRPL39 | 10286 | SKA1 |
| 387 | ALDH1A2 | 3687 | FASTKD5 | 6987 | MRPL4 | 10287 | SKA2 |
| 388 | ALDH1A3 | 3688 | FAT1 | 6988 | MRPL40 | 10288 | SKAP2 |
| 389 | ALDH1B1 | 3689 | FAT2 | 6989 | MRPL42 | 10289 | SKI |
| 390 | ALDH1L1 | 3690 | FAT4 | 6990 | MRPL43 | 10290 | SKIL |
| 391 | ALDH1L2 | 3691 | FATE1 | 6991 | MRPL44 | 10291 | SKIV2L |
| 392 | ALDH2 | 3692 | FAU | 6992 | MRPL45 | 10292 | SKOR1 |
| 393 | ALDH3A1 | 3693 | FAXC | 6993 | MRPL46 | 10293 | SKP1 |
| 394 | ALDH3A2 | 3694 | FBF1 | 6994 | MRPL49 | 10294 | SKP2 |
| 395 | ALDH3B1 | 3695 | FBH1 | 6995 | MRPL50 | 10295 | SLA |
| 396 | ALDH4A1 | 3696 | FBL | 6996 | MRPL53 | 10296 | SLAIN2 |
| 397 | ALDH5A1 | 3697 | FBLIM1 | 6997 | MRPL54 | 10297 | SLAMF1 |
| 398 | ALDH6A1 | 3698 | FBLN1 | 6998 | MRPL57 | 10298 | SLAMF6 |
| 399 | ALDH7A1 | 3699 | FBLN2 | 6999 | MRPL58 | 10299 | SLAMF7 |
| 400 | ALDH8A1 | 3700 | FBLN5 | 7000 | MRPL9 | 10300 | SLBP |
| 401 | ALDH9A1 | 3701 | FBN1 | 7001 | MRPS10 | 10301 | SLC10A1 |
| 402 | ALDOA | 3702 | FBN2 | 7002 | MRPS11 | 10302 | SLC10A2 |
| 403 | ALDOB | 3703 | FBP1 | 7003 | MRPS12 | 10303 | SLC10A6 |
| 404 | ALDOC | 3704 | FBP2 | 7004 | MRPS16 | 10304 | SLC11A1 |
| 405 | ALG1 | 3705 | FBRS | 7005 | MRPS18A | 10305 | SLC11A2 |
| 406 | ALG10B | 3706 | FBXL15 | 7006 | MRPS18B | 10306 | SLC12A1 |
| 407 | ALG11 | 3707 | FBXL20 | 7007 | MRPS18C | 10307 | SLC12A2 |
| 408 | ALG13 | 3708 | FBXL3 | 7008 | MRPS2 | 10308 | SLC12A3 |
| 409 | ALG14 | 3709 | FBXL4 | 7009 | MRPS21 | 10309 | SLC12A4 |
| 410 | ALG2 | 3710 | FBXL5 | 7010 | MRPS22 | 10310 | SLC12A5 |
| 411 | ALG3 | 3711 | FBXO11 | 7011 | MRPS23 | 10311 | SLC12A6 |
| 412 | ALG5 | 3712 | FBXO15 | 7012 | MRPS26 | 10312 | SLC12A7 |
| 413 | ALG6 | 3713 | FBXO17 | 7013 | MRPS27 | 10313 | SLC13A1 |
| 414 | ALG8 | 3714 | FBXO2 | 7014 | MRPS28 | 10314 | SLC13A2 |
| 415 | ALG9 | 3715 | FBXO22 | 7015 | MRPS30 | 10315 | SLC13A3 |
| 416 | ALK | 3716 | FBXO25 | 7016 | MRPS31 | 10316 | SLC13A4 |
| 417 | ALKBH1 | 3717 | FBXO27 | 7017 | MRPS34 | 10317 | SLC13A5 |
| 418 | ALKBH2 | 3718 | FBXO28 | 7018 | MRPS36 | 10318 | SLC14A1 |
| 419 | ALKBH3 | 3719 | FBXO3 | 7019 | MRPS5 | 10319 | SLC15A1 |
| 420 | ALKBH5 | 3720 | FBXO30 | 7020 | MRPS7 | 10320 | SLC15A2 |
| 421 | ALKBH6 | 3721 | FBXO31 | 7021 | MRPS9 | 10321 | SLC15A4 |
| 422 | ALKBH7 | 3722 | FBXO32 | 7022 | MRTFA | 10322 | SLC16A1 |
| 423 | ALLC | 3723 | FBXO38 | 7023 | MRTFB | 10323 | SLC16A10 |
| 424 | ALMS1 | 3724 | FBXO4 | 7024 | MRTO4 | 10324 | SLC16A12 |
| 425 | ALOX12 | 3725 | FBXO42 | 7025 | MS4A1 | 10325 | SLC16A2 |
| 426 | ALOX15 | 3726 | FBXO44 | 7026 | MS4A2 | 10326 | SLC16A3 |
| 427 | ALOX15B | 3727 | FBXO46 | 7027 | MS4A4A | 10327 | SLC16A4 |
| 428 | ALOX5 | 3728 | FBXO5 | 7028 | MS4A6A | 10328 | SLC16A7 |
| 429 | ALOX5AP | 3729 | FBXO6 | 7029 | MSANTD2 | 10329 | SLC16A8 |
| 430 | ALOXE3 | 3730 | FBXO7 | 7030 | MSANTD4 | 10330 | SLC16A9 |
| 431 | ALPG | 3731 | FBXO9 | 7031 | MSBP1 | 10331 | SLC17A1 |
| 432 | ALPI | 3732 | FBXW11 | 7032 | MSBP2 | 10332 | SLC17A3 |
| 433 | ALPK1 | 3733 | FBXW2 | 7033 | MSH2 | 10333 | SLC17A4 |
| 434 | ALPK3 | 3734 | FBXW4 | 7034 | MSH3 | 10334 | SLC17A5 |
| 435 | ALPL | 3735 | FBXW5 | 7035 | MSH4 | 10335 | SLC17A6 |
| 436 | ALPP | 3736 | FBXW7 | 7036 | MSH5 | 10336 | SLC17A7 |
| 437 | ALS2 | 3737 | FBXW8 | 7037 | MSH6 | 10337 | SLC17A8 |
| 438 | ALS2CL | 3738 | FBXW9 | 7038 | MSI1 | 10338 | SLC17A9 |
| 439 | ALX1 | 3739 | FCAR | 7039 | MSI2 | 10339 | SLC18A1 |
| 440 | ALX3 | 3740 | FCER1A | 7040 | MSL1 | 10340 | SLC18A2 |
| 441 | ALX4 | 3741 | FCER1G | 7041 | MSL2 | 10341 | SLC18A3 |
| 442 | ALYREF | 3742 | FCER2 | 7042 | MSL3 | 10342 | SLC19A1 |
| 443 | AMACR | 3743 | FCGR1A | 7043 | MSLN | 10343 | SLC19A2 |
| 444 | AMBN | 3744 | FCGR2A | 7044 | MSMB | 10344 | SLC19A3 |
| 445 | AMBP | 3745 | FCGR2B | 7045 | MSMO1 | 10345 | SLC1A1 |
| 446 | AMBRA1 | 3746 | FCGR2C | 7046 | MSMP | 10346 | SLC1A2 |
| 447 | AMD1 | 3747 | FCGR3A | 7047 | MSN | 10347 | SLC1A3 |
| 448 | AMELX | 3748 | FCGR3B | 7048 | MSR1 | 10348 | SLC1A4 |
| 449 | AMFR | 3749 | FCGRT | 7049 | MSRA | 10349 | SLC1A5 |
| 450 | AMH | 3750 | FCHO2 | 7050 | MSRB1 | 10350 | SLC1A6 |
| 451 | AMHR2 | 3751 | FCHSD2 | 7051 | MSRB2 | 10351 | SLC1A7 |
| 452 | AMIGO2 | 3752 | FCMR | 7052 | MSRB3 | 10352 | SLC20A1 |
| 453 | AMN | 3753 | FCN1 | 7053 | MSS51 | 10353 | SLC20A2 |
| 454 | AMOT | 3754 | FCN2 | 7054 | MST1 | 10354 | SLC22A1 |
| 455 | AMOTL1 | 3755 | FCN3 | 7055 | MST1R | 10355 | SLC22A11 |
| 456 | AMOTL2 | 3756 | FCRL3 | 7056 | MSTN | 10356 | SLC22A12 |
| 457 | AMPD1 | 3757 | FCRL4 | 7057 | MSTO1 | 10357 | SLC22A13 |
| 458 | AMPD2 | 3758 | FCRL6 | 7058 | MSX1 | 10358 | SLC22A16 |
| 459 | AMPD3 | 3759 | FCRLB | 7059 | MSX2 | 10359 | SLC22A17 |
| 460 | AMPH | 3760 | FCSK | 7060 | MT1A | 10360 | SLC22A18 |
| 461 | AMT | 3761 | FDFT1 | 7061 | MT1E | 10361 | SLC22A2 |
| 462 | AMY1A | 3762 | FDPS | 7062 | MT1F | 10362 | SLC22A3 |
| 463 | AMY1C | 3763 | FDX1 | 7063 | MT1H | 10363 | SLC22A4 |
| 464 | AMY2A | 3764 | FDX2 | 7064 | MT1M | 10364 | SLC22A5 |
| 465 | ANAPC1 | 3765 | FDXR | 7065 | MT1X | 10365 | SLC22A6 |
| 466 | ANAPC10 | 3766 | FECH | 7066 | MT2A | 10366 | SLC22A8 |
| 467 | ANAPC11 | 3767 | FEM1C | 7067 | MT3 | 10367 | SLC23A1 |
| 468 | ANAPC13 | 3768 | FEN1 | 7068 | MT4 | 10368 | SLC23A2 |
| 469 | ANAPC16 | 3769 | FENDRR | 7069 | MTA1 | 10369 | SLC24A1 |
| 470 | ANAPC2 | 3770 | FER | 7070 | MTA2 | 10370 | SLC24A2 |
| 471 | ANAPC4 | 3771 | FERMT1 | 7071 | MTA3 | 10371 | SLC24A4 |
| 472 | ANAPC5 | 3772 | FERMT2 | 7072 | MTAP | 10372 | SLC24A5 |
| 473 | ANG | 3773 | FERMT3 | 7073 | MTARC1 | 10373 | SLC25A1 |
| 474 | ANGPT1 | 3774 | FES | 7074 | MTARC2 | 10374 | SLC25A10 |
| 475 | ANGPT2 | 3775 | FEZ1 | 7075 | MT-ATP6 | 10375 | SLC25A11 |
| 476 | ANGPTL2 | 3776 | FFAR1 | 7076 | MT-ATP8 | 10376 | SLC25A12 |
| 477 | ANGPTL3 | 3777 | FFAR2 | 7077 | MTBP | 10377 | SLC25A13 |
| 478 | ANGPTL4 | 3778 | FFAR4 | 7078 | MTCH1 | 10378 | SLC25A14 |
| 479 | ANGPTL6 | 3779 | FGA | 7079 | MTCH2 | 10379 | SLC25A15 |
| 480 | ANGPTL8 | 3780 | FGB | 7080 | MTCL1 | 10380 | SLC25A17 |
| 481 | ANK1 | 3781 | FGD1 | 7081 | MT-CO1 | 10381 | SLC25A18 |
| 482 | ANK2 | 3782 | FGD2 | 7082 | MT-CO2 | 10382 | SLC25A19 |
| 483 | ANK3 | 3783 | FGD4 | 7083 | MT-CO3 | 10383 | SLC25A2 |
| 484 | ANKAR | 3784 | FGD5-AS1 | 7084 | MT-CYB | 10384 | SLC25A20 |
| 485 | ANKFY1 | 3785 | FGD6 | 7085 | MTDH | 10385 | SLC25A21 |
| 486 | ANKH | 3786 | FGF1 | 7086 | MTERF1 | 10386 | SLC25A22 |
| 487 | ANKHD1 | 3787 | FGF10 | 7087 | MTERF2 | 10387 | SLC25A24 |
| 488 | ANKIB1 | 3788 | FGF13 | 7088 | MTERF3 | 10388 | SLC25A26 |
| 489 | ANKK1 | 3789 | FGF14 | 7089 | MTF1 | 10389 | SLC25A27 |
| 490 | ANKLE1 | 3790 | FGF16 | 7090 | MTF2 | 10390 | SLC25A28 |
| 491 | ANKLE2 | 3791 | FGF18 | 7091 | MTFMT | 10391 | SLC25A29 |
| 492 | ANKRD1 | 3792 | FGF19 | 7092 | MTFP1 | 10392 | SLC25A3 |
| 493 | ANKRD11 | 3793 | FGF2 | 7093 | MTFR1 | 10393 | SLC25A31 |
| 494 | ANKRD12 | 3794 | FGF20 | 7094 | MTFR1L | 10394 | SLC25A32 |
| 495 | ANKRD13A | 3795 | FGF21 | 7095 | MTG2 | 10395 | SLC25A37 |
| 496 | ANKRD17 | 3796 | FGF23 | 7096 | MTHFD1 | 10396 | SLC25A38 |
| 497 | ANKRD2 | 3797 | FGF3 | 7097 | MTHFD1L | 10397 | SLC25A4 |
| 498 | ANKRD23 | 3798 | FGF4 | 7098 | MTHFD2 | 10398 | SLC25A46 |
| 499 | ANKRD26 | 3799 | FGF5 | 7099 | MTHFD2L | 10399 | SLC25A48 |
| 500 | ANKRD28 | 3800 | FGF6 | 7100 | MTHFR | 10400 | SLC25A5 |
| 501 | ANKRD30A | 3801 | FGF7 | 7101 | MTHFS | 10401 | SLC25A6 |
| 502 | ANKRD36B | 3802 | FGF8 | 7102 | MTHFSD | 10402 | SLC26A1 |
| 503 | ANKRD49 | 3803 | FGF9 | 7103 | MTIF2 | 10403 | SLC26A11 |
| 504 | ANKRD50 | 3804 | FGFBP1 | 7104 | MTIF3 | 10404 | SLC26A2 |
| 505 | ANKRD52 | 3805 | FGFR1 | 7105 | MTM1 | 10405 | SLC26A3 |
| 506 | ANKRD54 | 3806 | FGFR1OP2 | 7106 | MTMR1 | 10406 | SLC26A4 |
| 507 | ANKRD55 | 3807 | FGFR2 | 7107 | MTMR10 | 10407 | SLC26A5 |
| 508 | ANKRD6 | 3808 | FGFR3 | 7108 | MTMR11 | 10408 | SLC26A6 |
| 509 | ANKS1A | 3809 | FGFR4 | 7109 | MTMR12 | 10409 | SLC26A9 |
| 510 | ANKS1B | 3810 | FGFRL1 | 7110 | MTMR14 | 10410 | SLC27A1 |
| 511 | ANKS6 | 3811 | FGG | 7111 | MTMR2 | 10411 | SLC27A2 |
| 512 | ANLN | 3812 | FGGY | 7112 | MTMR3 | 10412 | SLC27A4 |
| 513 | ANO1 | 3813 | FGL1 | 7113 | MTMR6 | 10413 | SLC27A5 |
| 514 | ANO10 | 3814 | FGL2 | 7114 | MTMR7 | 10414 | SLC27A6 |
| 515 | ANO3 | 3815 | FGR | 7115 | MTMR8 | 10415 | SLC28A1 |
| 516 | ANO5 | 3816 | FH | 7116 | MTMR9 | 10416 | SLC28A2 |
| 517 | ANO7 | 3817 | FHIT | 7117 | MT-ND1 | 10417 | SLC29A1 |
| 518 | ANOS1 | 3818 | FHL1 | 7118 | MT-ND2 | 10418 | SLC29A2 |
| 519 | ANP32A | 3819 | FHL2 | 7119 | MT-ND3 | 10419 | SLC29A3 |
| 520 | ANP32B | 3820 | FHL3 | 7120 | MT-ND4 | 10420 | SLC29A4 |
| 521 | ANP32E | 3821 | FHL5 | 7121 | MT-ND4L | 10421 | SLC2A1 |
| 522 | ANPEP | 3822 | FHOD1 | 7122 | MT-ND5 | 10422 | SLC2A10 |
| 523 | ANTXR1 | 3823 | FHOD3 | 7123 | MT-ND6 | 10423 | SLC2A13 |
| 524 | ANTXR2 | 3824 | FIBP | 7124 | MTNR1A | 10424 | SLC2A14 |
| 525 | ANXA1 | 3825 | FIG4 | 7125 | MTNR1B | 10425 | SLC2A2 |
| 526 | ANXA10 | 3826 | FIGNL1 | 7126 | MTO1 | 10426 | SLC2A3 |
| 527 | ANXA11 | 3827 | FILIP1L | 7127 | MTOR | 10427 | SLC2A4 |
| 528 | ANXA2 | 3828 | FIP1L1 | 7128 | MTPAP | 10428 | SLC2A5 |
| 529 | ANXA2P2 | 3829 | FIS1 | 7129 | MTPN | 10429 | SLC2A6 |
| 530 | ANXA2P3 | 3830 | FITM2 | 7130 | MTR | 10430 | SLC2A9 |
| 531 | ANXA3 | 3831 | FKBP10 | 7131 | MTRES1 | 10431 | SLC30A1 |
| 532 | ANXA4 | 3832 | FKBP14 | 7132 | MTREX | 10432 | SLC30A10 |
| 533 | ANXA5 | 3833 | FKBP15 | 7133 | MT-RNR1 | 10433 | SLC30A2 |
| 534 | ANXA6 | 3834 | FKBP1A | 7134 | MT-RNR2 | 10434 | SLC30A5 |
| 535 | ANXA7 | 3835 | FKBP1B | 7135 | MTRNR2L1 | 10435 | SLC30A6 |
| 536 | ANXA8 | 3836 | FKBP2 | 7136 | MTRNR2L5 | 10436 | SLC30A7 |
| 537 | ANXA9 | 3837 | FKBP3 | 7137 | MTRR | 10437 | SLC30A8 |
| 538 | AOAH | 3838 | FKBP4 | 7138 | MTSS1 | 10438 | SLC30A9 |
| 539 | AOC1 | 3839 | FKBP5 | 7139 | MTSS2 | 10439 | SLC31A1 |
| 540 | AOC3 | 3840 | FKBP6 | 7140 | MT-TE | 10440 | SLC32A1 |
| 541 | AOPEP | 3841 | FKBP8 | 7141 | MT-TF | 10441 | SLC33A1 |
| 542 | AOX1 | 3842 | FKRP | 7142 | MT-TG | 10442 | SLC34A1 |
| 543 | AP1B1 | 3843 | FKTN | 7143 | MT-TH | 10443 | SLC34A2 |
| 544 | AP1G1 | 3844 | FLAD1 | 7144 | MT-TK | 10444 | SLC34A3 |
| 545 | AP1G2 | 3845 | FLCN | 7145 | MT-TL1 | 10445 | SLC35A1 |
| 546 | AP1M1 | 3846 | FLG | 7146 | MT-TN | 10446 | SLC35A2 |
| 547 | AP1M2 | 3847 | FLG2 | 7147 | MTTP | 10447 | SLC35A3 |
| 548 | AP1S1 | 3848 | FLI1 | 7148 | MT-TR | 10448 | SLC35B1 |
| 549 | AP1S2 | 3849 | FLII | 7149 | MT-TS1 | 10449 | SLC35B2 |
| 550 | AP1S3 | 3850 | FLNA | 7150 | MT-TS2 | 10450 | SLC35B3 |
| 551 | AP2A1 | 3851 | FLNB | 7151 | MT-TV | 10451 | SLC35C1 |
| 552 | AP2A2 | 3852 | FLNC | 7152 | MT-TW | 10452 | SLC35C2 |
| 553 | AP2B1 | 3853 | FLOT1 | 7153 | MTUS1 | 10453 | SLC35D1 |
| 554 | AP2M1 | 3854 | FLOT2 | 7154 | MTUS2 | 10454 | SLC35E3 |
| 555 | AP2S1 | 3855 | FLRT1 | 7155 | MTX1 | 10455 | SLC36A1 |
| 556 | AP3B1 | 3856 | FLRT2 | 7156 | MTX2 | 10456 | SLC37A1 |
| 557 | AP3B2 | 3857 | FLRT3 | 7157 | MUC1 | 10457 | SLC37A2 |
| 558 | AP3D1 | 3858 | FLT1 | 7158 | MUC12 | 10458 | SLC37A3 |
| 559 | AP3M1 | 3859 | FLT1P1 | 7159 | MUC13 | 10459 | SLC37A4 |
| 560 | AP3M2 | 3860 | FLT3 | 7160 | MUC15 | 10460 | SLC38A1 |
| 561 | AP3S2 | 3861 | FLT3LG | 7161 | MUC16 | 10461 | SLC38A10 |
| 562 | AP4B1 | 3862 | FLT4 | 7162 | MUC17 | 10462 | SLC38A2 |
| 563 | AP4E1 | 3863 | FLVCR1 | 7163 | MUC2 | 10463 | SLC38A3 |
| 564 | AP4M1 | 3864 | FLVCR2 | 7164 | MUC20 | 10464 | SLC38A4 |
| 565 | AP4S1 | 3865 | FLYWCH1 | 7165 | MUC3A | 10465 | SLC38A5 |
| 566 | AP5B1 | 3866 | FLYWCH2 | 7166 | MUC3B | 10466 | SLC38A6 |
| 567 | AP5M1 | 3867 | FMN1 | 7167 | MUC4 | 10467 | SLC38A8 |
| 568 | APAF1 | 3868 | FMN2 | 7168 | MUC5AC | 10468 | SLC39A1 |
| 569 | APBA1 | 3869 | FMNL1 | 7169 | MUC5B | 10469 | SLC39A10 |
| 570 | APBA2 | 3870 | FMNL2 | 7170 | MUC6 | 10470 | SLC39A11 |
| 571 | APBA3 | 3871 | FMNL3 | 7171 | MUC7 | 10471 | SLC39A13 |
| 572 | APBB1 | 3872 | FMO1 | 7172 | MUCL1 | 10472 | SLC39A14 |
| 573 | APBB1IP | 3873 | FMO2 | 7173 | MUL1 | 10473 | SLC39A2 |
| 574 | APBB2 | 3874 | FMO3 | 7174 | MUS81 | 10474 | SLC39A4 |
| 575 | APBB3 | 3875 | FMO5 | 7175 | MUSK | 10475 | SLC39A5 |
| 576 | APC | 3876 | FMOD | 7176 | MUTYH | 10476 | SLC39A6 |
| 577 | APCDD1 | 3877 | FMR1 | 7177 | MVD | 10477 | SLC39A7 |
| 578 | APCS | 3878 | FN1 | 7178 | MVK | 10478 | SLC39A8 |
| 579 | APEH | 3879 | FN3K | 7179 | MVP | 10479 | SLC39A9 |
| 580 | APEX1 | 3880 | FNBP1 | 7180 | MX1 | 10480 | SLC3A1 |
| 581 | APEX2 | 3881 | FNBP1L | 7181 | MXD4 | 10481 | SLC3A2 |
| 582 | APH1A | 3882 | FNBP4 | 7182 | MXI1 | 10482 | SLC40A1 |
| 583 | APH1B | 3883 | FNDC11 | 7183 | MXRA5 | 10483 | SLC41A1 |
| 584 | API5 | 3884 | FNDC3A | 7184 | MYADML2 | 10484 | SLC43A1 |
| 585 | APIP | 3885 | FNDC3B | 7185 | MYB | 10485 | SLC43A3 |
| 586 | APLF | 3886 | FNDC5 | 7186 | MYBBP1A | 10486 | SLC44A1 |
| 587 | APLN | 3887 | FNIP1 | 7187 | MYBL2 | 10487 | SLC44A2 |
| 588 | APLNR | 3888 | FNIP2 | 7188 | MYBPC1 | 10488 | SLC45A1 |
| 589 | APLP1 | 3889 | FNTA | 7189 | MYBPC3 | 10489 | SLC45A2 |
| 590 | APLP2 | 3890 | FOCAD | 7190 | MYBPH | 10490 | SLC45A3 |
| 591 | APMAP | 3891 | FOLH1 | 7191 | MYBPHL | 10491 | SLC46A1 |
| 592 | APOA1 | 3892 | FOLR1 | 7192 | MYC | 10492 | SLC47A1 |
| 593 | APOA2 | 3893 | FOLR2 | 7193 | MYCBP | 10493 | SLC48A1 |
| 594 | APOA4 | 3894 | FOLR3 | 7194 | MYCBP2 | 10494 | SLC49A3 |
| 595 | APOA5 | 3895 | FOS | 7195 | MYCL | 10495 | SLC4A1 |
| 596 | APOB | 3896 | FOSB | 7196 | MYCN | 10496 | SLC4A11 |
| 597 | APOBEC1 | 3897 | FOSL1 | 7197 | MYCNOS | 10497 | SLC4A1AP |
| 598 | APOBEC3A | 3898 | FOSL2 | 7198 | MYCNUT | 10498 | SLC4A2 |
| 599 | APOBEC3A_B | 3899 | FOXA1 | 7199 | MYD88 | 10499 | SLC4A3 |
| 600 | APOBEC3B | 3900 | FOXA2 | 7200 | MYDGF | 10500 | SLC4A4 |
| 601 | APOBEC3C | 3901 | FOXB1 | 7201 | MYEF2 | 10501 | SLC4A5 |
| 602 | APOBEC3F | 3902 | FOXC1 | 7202 | MYF5 | 10502 | SLC4A7 |
| 603 | APOBEC3G | 3903 | FOXC2 | 7203 | MYF6 | 10503 | SLC4A8 |
| 604 | APOBEC3H | 3904 | FOXD2-AS1 | 7204 | MYH1 | 10504 | SLC51A |
| 605 | APOC1 | 3905 | FOXD3 | 7205 | MYH10 | 10505 | SLC51B |
| 606 | APOC2 | 3906 | FOXD4 | 7206 | MYH11 | 10506 | SLC52A1 |
| 607 | APOC3 | 3907 | FOXE1 | 7207 | MYH14 | 10507 | SLC52A2 |
| 608 | APOD | 3908 | FOXE3 | 7208 | MYH15 | 10508 | SLC52A3 |
| 609 | APOE | 3909 | FOXF1 | 7209 | MYH2 | 10509 | SLC5A1 |
| 610 | APOH | 3910 | FOXG1 | 7210 | MYH3 | 10510 | SLC5A11 |
| 611 | APOL1 | 3911 | FOXH1 | 7211 | MYH4 | 10511 | SLC5A2 |
| 612 | APOL2 | 3912 | FOXI1 | 7212 | MYH6 | 10512 | SLC5A3 |
| 613 | APOL4 | 3913 | FOXJ1 | 7213 | MYH7 | 10513 | SLC5A4 |
| 614 | APOM | 3914 | FOXJ2 | 7214 | MYH8 | 10514 | SLC5A5 |
| 615 | APOO | 3915 | FOXJ3 | 7215 | MYH9 | 10515 | SLC5A6 |
| 616 | APOOL | 3916 | FOXK1 | 7216 | MYL1 | 10516 | SLC5A7 |
| 617 | APP | 3917 | FOXK2 | 7217 | MYL12A | 10517 | SLC5A8 |
| 618 | APPBP2 | 3918 | FOXL1 | 7218 | MYL12B | 10518 | SLC66A1 |
| 619 | APPL1 | 3919 | FOXL2 | 7219 | MYL2 | 10519 | SLC6A1 |
| 620 | APPL2 | 3920 | FOXM1 | 7220 | MYL3 | 10520 | SLC6A11 |
| 621 | APRT | 3921 | FOXN1 | 7221 | MYL4 | 10521 | SLC6A12 |
| 622 | APTR | 3922 | FOXN2 | 7222 | MYL6 | 10522 | SLC6A13 |
| 623 | APTX | 3923 | FOXN3 | 7223 | MYL6B | 10523 | SLC6A14 |
| 624 | AQP1 | 3924 | FOXO1 | 7224 | MYL7 | 10524 | SLC6A17 |
| 625 | AQP10 | 3925 | FOXO3 | 7225 | MYL9 | 10525 | SLC6A19 |
| 626 | AQP11 | 3926 | FOXO4 | 7226 | MYLIP | 10526 | SLC6A2 |
| 627 | AQP12A | 3927 | FOXO6 | 7227 | MYLK | 10527 | SLC6A20 |
| 628 | AQP2 | 3928 | FOXP1 | 7228 | MYLK2 | 10528 | SLC6A3 |
| 629 | AQP3 | 3929 | FOXP2 | 7229 | MYLK3 | 10529 | SLC6A4 |
| 630 | AQP4 | 3930 | FOXP3 | 7230 | MYO10 | 10530 | SLC6A6 |
| 631 | AQP5 | 3931 | FOXP4 | 7231 | MYO15A | 10531 | SLC6A8 |
| 632 | AQP7 | 3932 | FOXQ1 | 7232 | MYO18A | 10532 | SLC6A9 |
| 633 | AQP8 | 3933 | FOXR1 | 7233 | MYO18B | 10533 | SLC7A1 |
| 634 | AQP9 | 3934 | FOXRED1 | 7234 | MYO1A | 10534 | SLC7A11 |
| 635 | AQR | 3935 | FPGS | 7235 | MYO1B | 10535 | SLC7A2 |
| 636 | AR | 3936 | FPR1 | 7236 | MYO1C | 10536 | SLC7A3 |
| 637 | ARAF | 3937 | FPR2 | 7237 | MYO1D | 10537 | SLC7A5 |
| 638 | ARAP1 | 3938 | FPR3 | 7238 | MYO1E | 10538 | SLC7A6OS |
| 639 | ARC | 3939 | FRAS1 | 7239 | MYO1F | 10539 | SLC7A7 |
| 640 | ARCN1 | 3940 | FRAT1 | 7240 | MYO3B | 10540 | SLC7A8 |
| 641 | AREG | 3941 | FRAXA | 7241 | MYO5A | 10541 | SLC7A9 |
| 642 | AREL1 | 3942 | FRDA2 | 7242 | MYO5B | 10542 | SLC8A1 |
| 643 | ARF1 | 3943 | FREM1 | 7243 | MYO5C | 10543 | SLC8A2 |
| 644 | ARF3 | 3944 | FREM2 | 7244 | MYO6 | 10544 | SLC8B1 |
| 645 | ARF4 | 3945 | FRK | 7245 | MYO7A | 10545 | SLC9A1 |
| 646 | ARF5 | 3946 | FRMD4A | 7246 | MYO7B | 10546 | SLC9A2 |
| 647 | ARF6 | 3947 | FRMD6 | 7247 | MYO9A | 10547 | SLC9A3 |
| 648 | ARFGAP1 | 3948 | FRMD7 | 7248 | MYO9B | 10548 | SLC9A3R1 |
| 649 | ARFGAP2 | 3949 | FRMD8 | 7249 | MYOC | 10549 | SLC9A3R2 |
| 650 | ARFGAP3 | 3950 | FRMPD4 | 7250 | MYOCD | 10550 | SLC9A6 |
| 651 | ARFGEF1 | 3951 | FRRS1L | 7251 | MYOD1 | 10551 | SLC9A7 |
| 652 | ARFGEF2 | 3952 | FRS2 | 7252 | MYOF | 10552 | SLC9A8 |
| 653 | ARFGEF3 | 3953 | FRY | 7253 | MYOG | 10553 | SLC9B1 |
| 654 | ARFIP1 | 3954 | FRYL | 7254 | MYOM1 | 10554 | SLC9B2 |
| 655 | ARFIP2 | 3955 | FRZB | 7255 | MYOM2 | 10555 | SLCO1A2 |
| 656 | ARG1 | 3956 | FSCN1 | 7256 | MYORG | 10556 | SLCO1B1 |
| 657 | ARG2 | 3957 | FSHR | 7257 | MYOT | 10557 | SLCO1B3 |
| 658 | ARGLU1 | 3958 | FST | 7258 | MYOZ2 | 10558 | SLCO1C1 |
| 659 | ARHGAP1 | 3959 | FSTL1 | 7259 | MYPN | 10559 | SLCO2A1 |
| 660 | ARHGAP10 | 3960 | FSTL3 | 7260 | MYRF | 10560 | SLCO2B1 |
| 661 | ARHGAP12 | 3961 | FTCD | 7261 | MYRIP | 10561 | SLCO3A1 |
| 662 | ARHGAP15 | 3962 | FTH1 | 7262 | MYSM1 | 10562 | SLCO4A1 |
| 663 | ARHGAP17 | 3963 | FTL | 7263 | MYT1 | 10563 | SLCO4C1 |
| 664 | ARHGAP18 | 3964 | FTMT | 7264 | MYT1L | 10564 | SLCO6A1 |
| 665 | ARHGAP20 | 3965 | FTO | 7265 | MYZAP | 10565 | SLF2 |
| 666 | ARHGAP21 | 3966 | FTO-IT1 | 7266 | MZF1 | 10566 | SLFN11 |
| 667 | ARHGAP23 | 3967 | FTSJ1 | 7267 | N4BP1 | 10567 | SLIRP |
| 668 | ARHGAP24 | 3968 | FTSJ3 | 7268 | N4BP2 | 10568 | SLIT1 |
| 669 | ARHGAP26 | 3969 | FTX | 7269 | N4BP2L2 | 10569 | SLIT2 |
| 670 | ARHGAP27 | 3970 | FUBP1 | 7270 | NAA10 | 10570 | SLIT3 |
| 671 | ARHGAP29 | 3971 | FUBP3 | 7271 | NAA15 | 10571 | SLITRK2 |
| 672 | ARHGAP30 | 3972 | FUCA1 | 7272 | NAA30 | 10572 | SLITRK6 |
| 673 | ARHGAP31 | 3973 | FUCA2 | 7273 | NAA35 | 10573 | SLK |
| 674 | ARHGAP32 | 3974 | FUNDC1 | 7274 | NAA50 | 10574 | SLMAP |
| 675 | ARHGAP35 | 3975 | FURIN | 7275 | NAALADL2 | 10575 | SLN |
| 676 | ARHGAP39 | 3976 | FUS | 7276 | NAB1 | 10576 | SLPI |
| 677 | ARHGAP4 | 3977 | FUT1 | 7277 | NAB2 | 10577 | SLSN3 |
| 678 | ARHGAP45 | 3978 | FUT2 | 7278 | NABP1 | 10578 | SLTM |
| 679 | ARHGAP5 | 3979 | FUT3 | 7279 | NABP2 | 10579 | SLU7 |
| 680 | ARHGAP9 | 3980 | FUT4 | 7280 | NACA | 10580 | SLURP1 |
| 681 | ARHGDIA | 3981 | FUT7 | 7281 | NACC1 | 10581 | SLX1A |
| 682 | ARHGDIB | 3982 | FUT8 | 7282 | NACC2 | 10582 | SLX1B |
| 683 | ARHGDIG | 3983 | FUT9 | 7283 | NADK | 10583 | SLX4 |
| 684 | ARHGEF1 | 3984 | FUZ | 7284 | NADK2 | 10584 | SM2 |
| 685 | ARHGEF11 | 3985 | FXN | 7285 | NADSYN1 | 10585 | SMAD1 |
| 686 | ARHGEF12 | 3986 | FXR1 | 7286 | NAE1 | 10586 | SMAD2 |
| 687 | ARHGEF15 | 3987 | FXR2 | 7287 | NAF1 | 10587 | SMAD3 |
| 688 | ARHGEF16 | 3988 | FXYD1 | 7288 | NAFLD1 | 10588 | SMAD4 |
| 689 | ARHGEF17 | 3989 | FXYD2 | 7289 | NAFLD2 | 10589 | SMAD5 |
| 690 | ARHGEF18 | 3990 | FXYD3 | 7290 | NAGA | 10590 | SMAD6 |
| 691 | ARHGEF2 | 3991 | FYB1 | 7291 | NAGK | 10591 | SMAD7 |
| 692 | ARHGEF25 | 3992 | FYB2 | 7292 | NAGLU | 10592 | SMAD9 |
| 693 | ARHGEF26 | 3993 | FYCO1 | 7293 | NAGPA | 10593 | SMAP1 |
| 694 | ARHGEF39 | 3994 | FYN | 7294 | NAGS | 10594 | SMAP2 |
| 695 | ARHGEF4 | 3995 | FYTTD1 | 7295 | NAIP | 10595 | SMARCA1 |
| 696 | ARHGEF5 | 3996 | FZD1 | 7296 | NAMPT | 10596 | SMARCA2 |
| 697 | ARHGEF6 | 3997 | FZD2 | 7297 | NANOG | 10597 | SMARCA4 |
| 698 | ARHGEF7 | 3998 | FZD3 | 7298 | NANOS3 | 10598 | SMARCA5 |
| 699 | ARID1A | 3999 | FZD4 | 7299 | NANP | 10599 | SMARCAD1 |
| 700 | ARID1B | 4000 | FZD5 | 7300 | NAP1L1 | 10600 | SMARCAL1 |
| 701 | ARID2 | 4001 | FZD6 | 7301 | NAP1L2 | 10601 | SMARCB1 |
| 702 | ARID3A | 4002 | FZD7 | 7302 | NAP1L4 | 10602 | SMARCC1 |
| 703 | ARID3B | 4003 | FZD8 | 7303 | NAPA | 10603 | SMARCC2 |
| 704 | ARID4A | 4004 | FZD9 | 7304 | NAPB | 10604 | SMARCD1 |
| 705 | ARID4B | 4005 | FZR1 | 7305 | NAPEPLD | 10605 | SMARCD2 |
| 706 | ARID5A | 4006 | G0S2 | 7306 | NAPG | 10606 | SMARCD3 |
| 707 | ARID5B | 4007 | G2E3 | 7307 | NAPRT | 10607 | SMARCE1 |
| 708 | ARIH1 | 4008 | G3BP1 | 7308 | NAPSA | 10608 | SMC1A |
| 709 | ARIH2 | 4009 | G3BP2 | 7309 | NARF | 10609 | SMC1B |
| 710 | ARL1 | 4010 | G6PC | 7310 | NARS1 | 10610 | SMC2 |
| 711 | ARL13A | 4011 | G6PC2 | 7311 | NARS2 | 10611 | SMC3 |
| 712 | ARL13B | 4012 | G6PC3 | 7312 | NASP | 10612 | SMC4 |
| 713 | ARL15 | 4013 | G6PD | 7313 | NAT1 | 10613 | SMC5 |
| 714 | ARL2 | 4014 | GAA | 7314 | NAT10 | 10614 | SMC6 |
| 715 | ARL2BP | 4015 | GAB1 | 7315 | NAT14 | 10615 | SMCHD1 |
| 716 | ARL3 | 4016 | GAB2 | 7316 | NAT2 | 10616 | SMCR8 |
| 717 | ARL5A | 4017 | GABARAP | 7317 | NAT8 | 10617 | SMDT1 |
| 718 | ARL6 | 4018 | GABARAPL1 | 7318 | NAT9 | 10618 | SMG1 |
| 719 | ARL6IP1 | 4019 | GABARAPL2 | 7319 | NAV1 | 10619 | SMG5 |
| 720 | ARL6IP4 | 4020 | GABBR1 | 7320 | NAV2 | 10620 | SMG7 |
| 721 | ARL6IP5 | 4021 | GABBR2 | 7321 | NAV3 | 10621 | SMG8 |
| 722 | ARL6IP6 | 4022 | GABPA | 7322 | NAXD | 10622 | SMG9 |
| 723 | ARL8B | 4023 | GABPB1 | 7323 | NAXE | 10623 | SMIM14 |
| 724 | ARMC1 | 4024 | GABRA1 | 7324 | NBAS | 10624 | SMIM19 |
| 725 | ARMC10 | 4025 | GABRA2 | 7325 | NBAT1 | 10625 | SMIM20 |
| 726 | ARMC4 | 4026 | GABRA3 | 7326 | NBEAL2 | 10626 | SMKR1 |
| 727 | ARMC5 | 4027 | GABRA4 | 7327 | NBL1 | 10627 | SMN1 |
| 728 | ARMC6 | 4028 | GABRA5 | 7328 | NBLST4 | 10628 | SMN2 |
| 729 | ARMC7 | 4029 | GABRA6 | 7329 | NBLST5 | 10629 | SMNDC1 |
| 730 | ARMC8 | 4030 | GABRB1 | 7330 | NBLST6 | 10630 | SMO |
| 731 | ARMCX1 | 4031 | GABRB2 | 7331 | NBLST7 | 10631 | SMOC1 |
| 732 | ARMCX2 | 4032 | GABRB3 | 7332 | NBN | 10632 | SMOC2 |
| 733 | ARMCX3 | 4033 | GABRD | 7333 | NBPF1 | 10633 | SMOX |
| 734 | ARMT1 | 4034 | GABRG2 | 7334 | NBPF10 | 10634 | SMPD1 |
| 735 | ARNT | 4035 | GABRG3 | 7335 | NBPF11 | 10635 | SMPD2 |
| 736 | ARNT2 | 4036 | GABRR3 | 7336 | NBPF12 | 10636 | SMPD3 |
| 737 | ARNTL | 4037 | GAD1 | 7337 | NBPF13P | 10637 | SMPD4 |
| 738 | ARNTL2 | 4038 | GAD2 | 7338 | NBPF14 | 10638 | SMPDL3B |
| 739 | ARPC1A | 4039 | GADD45A | 7339 | NBPF15 | 10639 | SMPX |
| 740 | ARPC1B | 4040 | GADD45B | 7340 | NBPF17P | 10640 | SMR3B |
| 741 | ARPC2 | 4041 | GADD45G | 7341 | NBPF18P | 10641 | SMS |
| 742 | ARPC3 | 4042 | GADD45GIP1 | 7342 | NBPF19 | 10642 | SMTN |
| 743 | ARPC4 | 4043 | GADL1 | 7343 | NBPF20 | 10643 | SMTNL2 |
| 744 | ARPC5 | 4044 | GAK | 7344 | NBPF21P | 10644 | SMU1 |
| 745 | ARPC5L | 4045 | GAL | 7345 | NBPF22P | 10645 | SMUG1 |
| 746 | ARPP19 | 4046 | GAL3ST1 | 7346 | NBPF25P | 10646 | SMURF1 |
| 747 | ARPP21 | 4047 | GAL3ST4 | 7347 | NBPF26 | 10647 | SMURF2 |
| 748 | ARRB1 | 4048 | GALC | 7348 | NBPF2P | 10648 | SMYD2 |
| 749 | ARRB2 | 4049 | GALE | 7349 | NBPF3 | 10649 | SMYD3 |
| 750 | ARRDC1 | 4050 | GALK1 | 7350 | NBPF4 | 10650 | SMYD4 |
| 751 | ARRDC3 | 4051 | GALK2 | 7351 | NBPF5P | 10651 | SNAI1 |
| 752 | ARRDC5 | 4052 | GALM | 7352 | NBPF6 | 10652 | SNAI2 |
| 753 | ARSA | 4053 | GALNS | 7353 | NBPF7 | 10653 | SNAP23 |
| 754 | ARSB | 4054 | GALNT1 | 7354 | NBPF8 | 10654 | SNAP25 |
| 755 | ARSG | 4055 | GALNT11 | 7355 | NBPF9 | 10655 | SNAP29 |
| 756 | ARSH | 4056 | GALNT12 | 7356 | NBR1 | 10656 | SNAPC5 |
| 757 | ARSI | 4057 | GALNT13 | 7357 | NBR2 | 10657 | SNAPIN |
| 758 | ARSJ | 4058 | GALNT14 | 7358 | NCALD | 10658 | SNCA |
| 759 | ARSL | 4059 | GALNT2 | 7359 | NCAM1 | 10659 | SNCAIP |
| 760 | ART1 | 4060 | GALNT3 | 7360 | NCAN | 10660 | SNCB |
| 761 | ART3 | 4061 | GALNT7 | 7361 | NCAPD2 | 10661 | SNCG |
| 762 | ARTN | 4062 | GALNT8 | 7362 | NCAPD3 | 10662 | SND1 |
| 763 | ARV1 | 4063 | GALP | 7363 | NCAPG | 10663 | SNED1 |
| 764 | ARVCF | 4064 | GALR1 | 7364 | NCAPG2 | 10664 | SNF8 |
| 765 | ARX | 4065 | GALR2 | 7365 | NCAPH | 10665 | SNHG1 |
| 766 | AS3MT | 4066 | GALT | 7366 | NCAPH2 | 10666 | SNHG16 |
| 767 | ASAH1 | 4067 | GAMT | 7367 | NCBP1 | 10667 | SNHG20 |
| 768 | ASAH2 | 4068 | GAN | 7368 | NCBP3 | 10668 | SNHG29 |
| 769 | ASAH2B | 4069 | GANAB | 7369 | NCEH1 | 10669 | SNHG3 |
| 770 | ASAP1 | 4070 | GANC | 7370 | NCF1 | 10670 | SNHG5 |
| 771 | ASAP1-IT1 | 4071 | GAP43 | 7371 | NCF1B | 10671 | SNHG8 |
| 772 | ASB10 | 4072 | GAPDH | 7372 | NCF1C | 10672 | SNIP1 |
| 773 | ASB11 | 4073 | GAPDHS | 7373 | NCF2 | 10673 | SNN |
| 774 | ASB2 | 4074 | GAPVD1 | 7374 | NCF4 | 10674 | SNORA4 |
| 775 | ASCC1 | 4075 | GAR1 | 7375 | NCF4-AS1 | 10675 | SNORA54 |
| 776 | ASCC2 | 4076 | GAREM1 | 7376 | NCK1 | 10676 | SNORA63 |
| 777 | ASCC3 | 4077 | GAREM2 | 7377 | NCK2 | 10677 | SNORA63B |
| 778 | ASCL1 | 4078 | GARS1 | 7378 | NCKAP1 | 10678 | SNORA81 |
| 779 | ASF1A | 4079 | GART | 7379 | NCKAP5L | 10679 | SNORD118 |
| 780 | ASF1B | 4080 | GAS1 | 7380 | NCKIPSD | 10680 | SNORD138 |
| 781 | ASGR1 | 4081 | GAS2 | 7381 | NCL | 10681 | SNORD59A |
| 782 | ASGR2 | 4082 | GAS2L2 | 7382 | NCLN | 10682 | SNRK |
| 783 | ASH1L | 4083 | GAS2L3 | 7383 | NCOA1 | 10683 | SNRNP200 |
| 784 | ASH2L | 4084 | GAS5 | 7384 | NCOA2 | 10684 | SNRNP27 |
| 785 | ASIC1 | 4085 | GAS6 | 7385 | NCOA3 | 10685 | SNRNP40 |
| 786 | ASIC2 | 4086 | GAS7 | 7386 | NCOA4 | 10686 | SNRNP70 |
| 787 | ASIC3 | 4087 | GAS8 | 7387 | NCOA5 | 10687 | SNRPA |
| 788 | ASIP | 4088 | GAST | 7388 | NCOA6 | 10688 | SNRPA1 |
| 789 | ASL | 4089 | GATA1 | 7389 | NCOA7 | 10689 | SNRPB |
| 790 | ASMT | 4090 | GATA2 | 7390 | NCOR1 | 10690 | SNRPB2 |
| 791 | ASMTL | 4091 | GATA3 | 7391 | NCOR2 | 10691 | SNRPC |
| 792 | ASNS | 4092 | GATA4 | 7392 | NCR1 | 10692 | SNRPD1 |
| 793 | ASPA | 4093 | GATA5 | 7393 | NCR2 | 10693 | SNRPD2 |
| 794 | ASPH | 4094 | GATA6 | 7394 | NCR3 | 10694 | SNRPD3 |
| 795 | ASPM | 4095 | GATAD1 | 7395 | NCR3LG1 | 10695 | SNRPE |
| 796 | ASPN | 4096 | GATAD2A | 7396 | NCS1 | 10696 | SNRPF |
| 797 | ASPRV1 | 4097 | GATAD2B | 7397 | NCSTN | 10697 | SNRPG |
| 798 | ASPSCR1 | 4098 | GATB | 7398 | NDC1 | 10698 | SNRPN |
| 799 | ASRGL1 | 4099 | GATD3A | 7399 | NDC80 | 10699 | SNTA1 |
| 800 | ASS1 | 4100 | GATM | 7400 | NDE1 | 10700 | SNTB1 |
| 801 | ASTN2 | 4101 | GBA | 7401 | NDEL1 | 10701 | SNTB2 |
| 802 | ASXL1 | 4102 | GBA2 | 7402 | NDFIP1 | 10702 | SNTG1 |
| 803 | ASXL2 | 4103 | GBA3 | 7403 | NDN | 10703 | SNU13 |
| 804 | ASXL3 | 4104 | GBE1 | 7404 | NDOR1 | 10704 | SNUPN |
| 805 | ATAD1 | 4105 | GBF1 | 7405 | NDRG1 | 10705 | SNURF |
| 806 | ATAD2 | 4106 | GBGT1 | 7406 | NDRG2 | 10706 | SNW1 |
| 807 | ATAD2B | 4107 | GBP1 | 7407 | NDRG3 | 10707 | SNX1 |
| 808 | ATAD3A | 4108 | GBP5 | 7408 | NDST1 | 10708 | SNX10 |
| 809 | ATAD3B | 4109 | GBP7 | 7409 | NDUFA1 | 10709 | SNX13 |
| 810 | ATAD5 | 4110 | GC | 7410 | NDUFA10 | 10710 | SNX14 |
| 811 | ATAT1 | 4111 | GCA | 7411 | NDUFA11 | 10711 | SNX17 |
| 812 | ATCAY | 4112 | GCAT | 7412 | NDUFA12 | 10712 | SNX18 |
| 813 | ATE1 | 4113 | GCC1 | 7413 | NDUFA13 | 10713 | SNX2 |
| 814 | ATF1 | 4114 | GCC2 | 7414 | NDUFA2 | 10714 | SNX22 |
| 815 | ATF2 | 4115 | GCDH | 7415 | NDUFA3 | 10715 | SNX27 |
| 816 | ATF3 | 4116 | GCFC2 | 7416 | NDUFA4 | 10716 | SNX29 |
| 817 | ATF4 | 4117 | GCG | 7417 | NDUFA4L2 | 10717 | SNX3 |
| 818 | ATF5 | 4118 | GCGR | 7418 | NDUFA5 | 10718 | SNX30 |
| 819 | ATF6 | 4119 | GCH1 | 7419 | NDUFA6 | 10719 | SNX4 |
| 820 | ATF7 | 4120 | GCK | 7420 | NDUFA7 | 10720 | SNX5 |
| 821 | ATG10 | 4121 | GCKR | 7421 | NDUFA8 | 10721 | SNX6 |
| 822 | ATG12 | 4122 | GCLC | 7422 | NDUFA9 | 10722 | SNX9 |
| 823 | ATG13 | 4123 | GCLM | 7423 | NDUFAB1 | 10723 | SOAT1 |
| 824 | ATG14 | 4124 | GCM1 | 7424 | NDUFAF1 | 10724 | SOAT2 |
| 825 | ATG16L1 | 4125 | GCN1 | 7425 | NDUFAF2 | 10725 | SOBP |
| 826 | ATG2A | 4126 | GCNA | 7426 | NDUFAF3 | 10726 | SOCS1 |
| 827 | ATG3 | 4127 | GCNT2 | 7427 | NDUFAF4 | 10727 | SOCS2 |
| 828 | ATG4A | 4128 | GCNT3 | 7428 | NDUFAF5 | 10728 | SOCS2-AS1 |
| 829 | ATG4B | 4129 | GCSH | 7429 | NDUFAF6 | 10729 | SOCS3 |
| 830 | ATG4C | 4130 | GDA | 7430 | NDUFAF7 | 10730 | SOCS4 |
| 831 | ATG4D | 4131 | GDAP1 | 7431 | NDUFAF8 | 10731 | SOCS6 |
| 832 | ATG5 | 4132 | GDE1 | 7432 | NDUFB1 | 10732 | SOCS7 |
| 833 | ATG7 | 4133 | GDF1 | 7433 | NDUFB10 | 10733 | SOD1 |
| 834 | ATG9A | 4134 | GDF10 | 7434 | NDUFB11 | 10734 | SOD2 |
| 835 | ATG9B | 4135 | GDF11 | 7435 | NDUFB2 | 10735 | SOD3 |
| 836 | ATIC | 4136 | GDF15 | 7436 | NDUFB3 | 10736 | SOGA3 |
| 837 | ATL1 | 4137 | GDF2 | 7437 | NDUFB4 | 10737 | SOHLH1 |
| 838 | ATL2 | 4138 | GDF3 | 7438 | NDUFB5 | 10738 | SOHLH2 |
| 839 | ATL3 | 4139 | GDF5 | 7439 | NDUFB6 | 10739 | SON |
| 840 | ATM | 4140 | GDF6 | 7440 | NDUFB7 | 10740 | SORBS1 |
| 841 | ATMIN | 4141 | GDF7 | 7441 | NDUFB8 | 10741 | SORBS2 |
| 842 | ATN1 | 4142 | GDF9 | 7442 | NDUFB9 | 10742 | SORBS3 |
| 843 | ATOH1 | 4143 | GDI1 | 7443 | NDUFC1 | 10743 | SORCS2 |
| 844 | ATOH7 | 4144 | GDI2 | 7444 | NDUFC2 | 10744 | SORCS3 |
| 845 | ATOH8 | 4145 | GDNF | 7445 | NDUFS1 | 10745 | SORD |
| 846 | ATOX1 | 4146 | GDPD1 | 7446 | NDUFS2 | 10746 | SORL1 |
| 847 | ATP10A | 4147 | GEM | 7447 | NDUFS3 | 10747 | SORT1 |
| 848 | ATP10B | 4148 | GEMIN2 | 7448 | NDUFS4 | 10748 | SOS1 |
| 849 | ATP10D | 4149 | GEMIN4 | 7449 | NDUFS5 | 10749 | SOS2 |
| 850 | ATP11A | 4150 | GEMIN6 | 7450 | NDUFS6 | 10750 | SOST |
| 851 | ATP11B | 4151 | GEMIN7 | 7451 | NDUFS7 | 10751 | SOSTDC1 |
| 852 | ATP11C | 4152 | GEN1 | 7452 | NDUFS8 | 10752 | SOWAHA |
| 853 | ATP12A | 4153 | GET1 | 7453 | NDUFV1 | 10753 | SOWAHC |
| 854 | ATP13A1 | 4154 | GET3 | 7454 | NDUFV2 | 10754 | SOX10 |
| 855 | ATP13A2 | 4155 | GET4 | 7455 | NDUFV2-AS1 | 10755 | SOX11 |
| 856 | ATP13A3 | 4156 | GFAP | 7456 | NDUFV3 | 10756 | SOX13 |
| 857 | ATP1A1 | 4157 | GFER | 7457 | NEAT1 | 10757 | SOX14 |
| 858 | ATP1A3 | 4158 | GFI1 | 7458 | NEB | 10758 | SOX17 |
| 859 | ATP1A4 | 4159 | GFI1B | 7459 | NEBL | 10759 | SOX18 |
| 860 | ATP1B1 | 4160 | GFM1 | 7460 | NECAB3 | 10760 | SOX2 |
| 861 | ATP1B2 | 4161 | GFM2 | 7461 | NECAP1 | 10761 | SOX2-OT |
| 862 | ATP1B3 | 4162 | GFPT1 | 7462 | NECTIN1 | 10762 | SOX3 |
| 863 | ATP2A1 | 4163 | GFPT2 | 7463 | NECTIN2 | 10763 | SOX30 |
| 864 | ATP2A2 | 4164 | GFRA1 | 7464 | NECTIN3 | 10764 | SOX4 |
| 865 | ATP2A3 | 4165 | GFRA2 | 7465 | NEDD1 | 10765 | SOX5 |
| 866 | ATP2B1 | 4166 | GFUS | 7466 | NEDD4 | 10766 | SOX6 |
| 867 | ATP2B2 | 4167 | GGA1 | 7467 | NEDD4L | 10767 | SOX9 |
| 868 | ATP2B3 | 4168 | GGA2 | 7468 | NEDD8 | 10768 | SP1 |
| 869 | ATP2B4 | 4169 | GGA3 | 7469 | NEDD9 | 10769 | SP100 |
| 870 | ATP2C1 | 4170 | GGACT | 7470 | NEFH | 10770 | SP110 |
| 871 | ATP4A | 4171 | GGCT | 7471 | NEFL | 10771 | SP140 |
| 872 | ATP5F1A | 4172 | GGCX | 7472 | NEFM | 10772 | SP140L |
| 873 | ATP5F1B | 4173 | GGH | 7473 | NEGR1 | 10773 | SP2 |
| 874 | ATP5F1C | 4174 | GGN | 7474 | NEIL1 | 10774 | SP3 |
| 875 | ATP5F1D | 4175 | GGNBP2 | 7475 | NEIL2 | 10775 | SP4 |
| 876 | ATP5F1E | 4176 | GGPS1 | 7476 | NEIL3 | 10776 | SP6 |
| 877 | ATP5IF1 | 4177 | GGT1 | 7477 | NEK1 | 10777 | SP7 |
| 878 | ATP5MD | 4178 | GGT2 | 7478 | NEK10 | 10778 | SP8 |
| 879 | ATP5MF | 4179 | GGT3P | 7479 | NEK11 | 10779 | SPA17 |
| 880 | ATP5MG | 4180 | GGT5 | 7480 | NEK2 | 10780 | SPAAR |
| 881 | ATP5MPL | 4181 | GGT6 | 7481 | NEK3 | 10781 | SPACA1 |
| 882 | ATP5PB | 4182 | GGT7 | 7482 | NEK4 | 10782 | SPAG1 |
| 883 | ATP5PD | 4183 | GGTLC1 | 7483 | NEK4P3 | 10783 | SPAG16 |
| 884 | ATP5PF | 4184 | GGTLC2 | 7484 | NEK6 | 10784 | SPAG17 |
| 885 | ATP5PO | 4185 | GGTLC3 | 7485 | NEK7 | 10785 | SPAG5 |
| 886 | ATP6AP1 | 4186 | GGTLC4P | 7486 | NEK8 | 10786 | SPAG6 |
| 887 | ATP6AP2 | 4187 | GGTLC5P | 7487 | NEK9 | 10787 | SPAG7 |
| 888 | ATP6V0A1 | 4188 | GH1 | 7488 | NELFA | 10788 | SPAG8 |
| 889 | ATP6V0A2 | 4189 | GH2 | 7489 | NELFB | 10789 | SPAG9 |
| 890 | ATP6V0A4 | 4190 | GHDC | 7490 | NELFCD | 10790 | SPAM1 |
| 891 | ATP6V0C | 4191 | GHITM | 7491 | NELFE | 10791 | SPANXD |
| 892 | ATP6V0D1 | 4192 | GHR | 7492 | NELL1 | 10792 | SPARC |
| 893 | ATP6V0E2 | 4193 | GHRH | 7493 | NEMF | 10793 | SPARCL1 |
| 894 | ATP6V1A | 4194 | GHRHR | 7494 | NEMP1 | 10794 | SPART |
| 895 | ATP6V1B1 | 4195 | GHRL | 7495 | NEMP2 | 10795 | SPAST |
| 896 | ATP6V1B2 | 4196 | GHSR | 7496 | NENF | 10796 | SPATA16 |
| 897 | ATP6V1E1 | 4197 | GIGYF1 | 7497 | NEO1 | 10797 | SPATA18 |
| 898 | ATP6V1G1 | 4198 | GIGYF2 | 7498 | NES | 10798 | SPATA2 |
| 899 | ATP6V1G2-DDX39B | 4199 | GIMAP5 | 7499 | NET1 | 10799 | SPATA31A7 |
| 900 | ATP6V1H | 4200 | GINS1 | 7500 | NEU1 | 10800 | SPATA33 |
| 901 | ATP7A | 4201 | GINS2 | 7501 | NEU2 | 10801 | SPATA5 |
| 902 | ATP7B | 4202 | GINS3 | 7502 | NEU3 | 10802 | SPATA6 |
| 903 | ATP8A1 | 4203 | GINS4 | 7503 | NEURL4 | 10803 | SPATA7 |
| 904 | ATP8A2 | 4204 | GIP | 7504 | NEUROD1 | 10804 | SPATS2L |
| 905 | ATP8B1 | 4205 | GIPC1 | 7505 | NEUROG1 | 10805 | SPCS1 |
| 906 | ATP8B2 | 4206 | GIPR | 7506 | NEUROG2 | 10806 | SPCS2 |
| 907 | ATP8B3 | 4207 | GIT1 | 7507 | NEUROG3 | 10807 | SPCS3 |
| 908 | ATP8B4 | 4208 | GIT2 | 7508 | NEXN | 10808 | SPDEF |
| 909 | ATP9A | 4209 | GJA1 | 7509 | NF1 | 10809 | SPDL1 |
| 910 | ATP9B | 4210 | GJA4 | 7510 | NF2 | 10810 | SPDYA |
| 911 | ATPAF1 | 4211 | GJA5 | 7511 | NFASC | 10811 | SPDYC |
| 912 | ATPAF2 | 4212 | GJA8 | 7512 | NFAT5 | 10812 | SPECC1 |
| 913 | ATPSCKMT | 4213 | GJA9 | 7513 | NFATC1 | 10813 | SPECC1L |
| 914 | ATR | 4214 | GJB1 | 7514 | NFATC2 | 10814 | SPEF2 |
| 915 | ATRAID | 4215 | GJB2 | 7515 | NFATC2IP | 10815 | SPEG |
| 916 | ATRIP | 4216 | GJB3 | 7516 | NFATC3 | 10816 | SPEM1 |
| 917 | ATRIP-TREX1 | 4217 | GJB4 | 7517 | NFATC4 | 10817 | SPEN |
| 918 | ATRN | 4218 | GJB5 | 7518 | NFE2 | 10818 | SPESP1 |
| 919 | ATRNL1 | 4219 | GJB6 | 7519 | NFE2L1 | 10819 | SPG11 |
| 920 | ATRX | 4220 | GJC1 | 7520 | NFE2L2 | 10820 | SPG21 |
| 921 | ATXN1 | 4221 | GJC2 | 7521 | NFE2L3 | 10821 | SPG7 |
| 922 | ATXN10 | 4222 | GJC3 | 7522 | NFIA | 10822 | SPHK1 |
| 923 | ATXN1L | 4223 | GJD2 | 7523 | NFIB | 10823 | SPHK2 |
| 924 | ATXN2 | 4224 | GJD4 | 7524 | NFIC | 10824 | SPHKAP |
| 925 | ATXN2L | 4225 | GK | 7525 | NFIL3 | 10825 | SPI1 |
| 926 | ATXN3 | 4226 | GK2 | 7526 | NFIX | 10826 | SPIB |
| 927 | ATXN7 | 4227 | GKAP1 | 7527 | NFKB1 | 10827 | SPIC |
| 928 | ATXN7L3 | 4228 | GKN1 | 7528 | NFKB2 | 10828 | SPICE1 |
| 929 | ATXN8OS | 4229 | GKN2 | 7529 | NFKBIA | 10829 | SPIDR |
| 930 | AUH | 4230 | GLA | 7530 | NFKBIB | 10830 | SPIN1 |
| 931 | AUP1 | 4231 | GLB1 | 7531 | NFKBIE | 10831 | SPIN2B |
| 932 | AURKA | 4232 | GLCCI1 | 7532 | NFKBIL1 | 10832 | SPINDOC |
| 933 | AURKB | 4233 | GLCE | 7533 | NFRKB | 10833 | SPINK1 |
| 934 | AURKC | 4234 | GLDC | 7534 | NFS1 | 10834 | SPINK13 |
| 935 | AUTS2 | 4235 | GLDN | 7535 | NFU1 | 10835 | SPINK4 |
| 936 | AVEN | 4236 | GLE1 | 7536 | NFX1 | 10836 | SPINK5 |
| 937 | AVIL | 4237 | GLG1 | 7537 | NFXL1 | 10837 | SPINK6 |
| 938 | AVP | 4238 | GLI1 | 7538 | NFYA | 10838 | SPINK7 |
| 939 | AVPR1A | 4239 | GLI2 | 7539 | NFYB | 10839 | SPINT1 |
| 940 | AVPR1B | 4240 | GLI3 | 7540 | NFYC | 10840 | SPINT2 |
| 941 | AVPR2 | 4241 | GLIPR1 | 7541 | NGB | 10841 | SPIRE2 |
| 942 | AWAT2 | 4242 | GLIPR2 | 7542 | NGDN | 10842 | SPN |
| 943 | AXIN1 | 4243 | GLIS2 | 7543 | NGEF | 10843 | SPNS2 |
| 944 | AXIN2 | 4244 | GLIS3 | 7544 | NGF | 10844 | SPO11 |
| 945 | AXL | 4245 | GLMN | 7545 | NGF-AS1 | 10845 | SPOCK1 |
| 946 | AZGP1 | 4246 | GLO1 | 7546 | NGFR | 10846 | SPON1 |
| 947 | AZIN1 | 4247 | GLP1R | 7547 | NGLY1 | 10847 | SPON2 |
| 948 | AZIN2 | 4248 | GLP2R | 7548 | NGRN | 10848 | SPOP |
| 949 | AZU1 | 4249 | GLRA1 | 7549 | NHEG1 | 10849 | SPP1 |
| 950 | B2M | 4250 | GLRA2 | 7550 | NHEJ1 | 10850 | SPPL2A |
| 951 | B3GALNT2 | 4251 | GLRB | 7551 | NHLH1 | 10851 | SPR |
| 952 | B3GALT4 | 4252 | GLRX | 7552 | NHLH2 | 10852 | SPRED1 |
| 953 | B3GALT5-AS1 | 4253 | GLRX2 | 7553 | NHLRC1 | 10853 | SPRED2 |
| 954 | B3GALT6 | 4254 | GLRX3 | 7554 | NHLRC2 | 10854 | SPRED3 |
| 955 | B3GAT1 | 4255 | GLRX5 | 7555 | NHP2 | 10855 | SPRING1 |
| 956 | B3GAT2 | 4256 | GLS | 7556 | NIBAN1 | 10856 | SPRN |
| 957 | B3GNT2 | 4257 | GLS2 | 7557 | NIBAN2 | 10857 | SPRR1B |
| 958 | B3GNT7 | 4258 | GLT8D1 | 7558 | NICN1 | 10858 | SPRR2A |
| 959 | B4GALNT1 | 4259 | GLUD1 | 7559 | NID1 | 10859 | SPRTN |
| 960 | B4GALNT2 | 4260 | GLUD1P5 | 7560 | NID2 | 10860 | SPRY1 |
| 961 | B4GALT1 | 4261 | GLUD2 | 7561 | NIDDM2 | 10861 | SPRY2 |
| 962 | B4GALT2 | 4262 | GLUL | 7562 | NIDDM3 | 10862 | SPRY4 |
| 963 | B4GALT3 | 4263 | GLYAT | 7563 | NIDDM4 | 10863 | SPRY4-IT1 |
| 964 | B4GALT6 | 4264 | GLYATL1 | 7564 | NIN | 10864 | SPRYD7 |
| 965 | B4GALT7 | 4265 | GLYATL3 | 7565 | NINJ1 | 10865 | SPSB1 |
| 966 | B9D1 | 4266 | GLYCTK | 7566 | NINJ2 | 10866 | SPTA1 |
| 967 | B9D2 | 4267 | GLYR1 | 7567 | NINL | 10867 | SPTAN1 |
| 968 | BA000025-001 | 4268 | GM2A | 7568 | NIP7 | 10868 | SPTB |
| 969 | BA000025-002 | 4269 | GMDS | 7569 | NIPA1 | 10869 | SPTBN1 |
| 970 | BAAT | 4270 | GMEB1 | 7570 | NIPAL4 | 10870 | SPTBN2 |
| 971 | BABAM1 | 4271 | GMFB | 7571 | NIPBL | 10871 | SPTBN4 |
| 972 | BABAM2 | 4272 | GMIP | 7572 | NIPSNAP1 | 10872 | SPTLC1 |
| 973 | BACE1 | 4273 | GMNC | 7573 | NIPSNAP2 | 10873 | SPTLC2 |
| 974 | BACE2 | 4274 | GMNN | 7574 | NIPSNAP3B | 10874 | SPTLC3 |
| 975 | BACH1 | 4275 | GMPPA | 7575 | NISCH | 10875 | SPTSSA |
| 976 | BACH2 | 4276 | GMPPB | 7576 | NIT1 | 10876 | SPTSSB |
| 977 | BAD | 4277 | GMPR | 7577 | NIT2 | 10877 | SPTY2D1 |
| 978 | BAG1 | 4278 | GMPR2 | 7578 | NKAP | 10878 | SPX |
| 979 | BAG2 | 4279 | GMPS | 7579 | NKD1 | 10879 | SQLE |
| 980 | BAG3 | 4280 | GNA11 | 7580 | NKD2 | 10880 | SQOR |
| 981 | BAG4 | 4281 | GNA12 | 7581 | NKILA | 10881 | SQSTM1 |
| 982 | BAG5 | 4282 | GNA13 | 7582 | NKIRAS2 | 10882 | SRA1 |
| 983 | BAG6 | 4283 | GNA14 | 7583 | NKRF | 10883 | SRBD1 |
| 984 | BAHCC1 | 4284 | GNA15 | 7584 | NKTR | 10884 | SRC |
| 985 | BAHD1 | 4285 | GNAI1 | 7585 | NKX1-1 | 10885 | SRCAP |
| 986 | BAIAP2 | 4286 | GNAI2 | 7586 | NKX2-1 | 10886 | SRCIN1 |
| 987 | BAIAP2L1 | 4287 | GNAI3 | 7587 | NKX2-2 | 10887 | SRD5A1 |
| 988 | BAK1 | 4288 | GNAL | 7588 | NKX2-3 | 10888 | SRD5A2 |
| 989 | BAMBI | 4289 | GNAO1 | 7589 | NKX2-5 | 10889 | SRD5A3 |
| 990 | BANCR | 4290 | GNAQ | 7590 | NKX2-8 | 10890 | SREBF1 |
| 991 | BANF1 | 4291 | GNAS | 7591 | NKX3-1 | 10891 | SREBF2 |
| 992 | BANF2 | 4292 | GNAS-AS1 | 7592 | NKX6-1 | 10892 | SRF |
| 993 | BANP | 4293 | GNAT1 | 7593 | NKX6-2 | 10893 | SRFBP1 |
| 994 | BAP1 | 4294 | GNAZ | 7594 | NLGN1 | 10894 | SRGAP1 |
| 995 | BARD1 | 4295 | GNB1 | 7595 | NLGN2 | 10895 | SRGAP2 |
| 996 | BARX1 | 4296 | GNB2 | 7596 | NLGN3 | 10896 | SRGN |
| 997 | BASP1 | 4297 | GNB3 | 7597 | NLGN4X | 10897 | SRI |
| 998 | BATF | 4298 | GNB4 | 7598 | NLK | 10898 | SRIP1 |
| 999 | BATF2 | 4299 | GNE | 7599 | NLN | 10899 | SRL |
| 1000 | BAX | 4300 | GNG12 | 7600 | NLRC3 | 10900 | SRM |
| 1001 | BAZ1A | 4301 | GNG2 | 7601 | NLRC4 | 10901 | SRP14 |
| 1002 | BAZ1B | 4302 | GNG3 | 7602 | NLRC5 | 10902 | SRP19 |
| 1003 | BAZ2A | 4303 | GNG7 | 7603 | NLRP1 | 10903 | SRP54 |
| 1004 | BAZ2B | 4304 | GNL1 | 7604 | NLRP10 | 10904 | SRP68 |
| 1005 | BBC3 | 4305 | GNL2 | 7605 | NLRP12 | 10905 | SRP72 |
| 1006 | BBOF1 | 4306 | GNL3 | 7606 | NLRP13 | 10906 | SRP9 |
| 1007 | BBOX1 | 4307 | GNLY | 7607 | NLRP2 | 10907 | SRPK1 |
| 1008 | BBS1 | 4308 | GNMT | 7608 | NLRP3 | 10908 | SRPK2 |
| 1009 | BBS10 | 4309 | GNPAT | 7609 | NLRP5 | 10909 | SRPK3 |
| 1010 | BBS12 | 4310 | GNPDA1 | 7610 | NLRP6 | 10910 | SRPRA |
| 1011 | BBS2 | 4311 | GNPDA2 | 7611 | NLRP7 | 10911 | SRPRB |
| 1012 | BBS4 | 4312 | GNPNAT1 | 7612 | NLRX1 | 10912 | SRPX |
| 1013 | BBS5 | 4313 | GNPTAB | 7613 | NM | 10913 | SRPX2 |
| 1014 | BBS7 | 4314 | GNPTG | 7614 | NMB | 10914 | SRR |
| 1015 | BBS9 | 4315 | GNRH1 | 7615 | NMBR | 10915 | SRRM1 |
| 1016 | BBX | 4316 | GNRH2 | 7616 | NMD3 | 10916 | SRRM2 |
| 1017 | BCAM | 4317 | GNRHR | 7617 | NME1 | 10917 | SRRT |
| 1018 | BCAP29 | 4318 | GNS | 7618 | NME1-NME2 | 10918 | SRSF1 |
| 1019 | BCAP31 | 4319 | GOLGA1 | 7619 | NME2 | 10919 | SRSF10 |
| 1020 | BCAR1 | 4320 | GOLGA2 | 7620 | NME3 | 10920 | SRSF11 |
| 1021 | BCAR3 | 4321 | GOLGA2P5 | 7621 | NME4 | 10921 | SRSF2 |
| 1022 | BCAS2 | 4322 | GOLGA3 | 7622 | NME5 | 10922 | SRSF3 |
| 1023 | BCAS3 | 4323 | GOLGA4 | 7623 | NME6 | 10923 | SRSF4 |
| 1024 | BCAT1 | 4324 | GOLGA5 | 7624 | NME7 | 10924 | SRSF5 |
| 1025 | BCCIP | 4325 | GOLGA7 | 7625 | NME8 | 10925 | SRSF6 |
| 1026 | BCHE | 4326 | GOLGA8B | 7626 | NME9 | 10926 | SRSF7 |
| 1027 | BCKDHA | 4327 | GOLGB1 | 7627 | NMI | 10927 | SRSF8 |
| 1028 | BCKDHB | 4328 | GOLIM4 | 7628 | NMNAT1 | 10928 | SRSF9 |
| 1029 | BCKDK | 4329 | GOLM1 | 7629 | NMNAT2 | 10929 | SRXN1 |
| 1030 | BCL10 | 4330 | GOLM2 | 7630 | NMRAL1 | 10930 | SRY |
| 1031 | BCL11A | 4331 | GOLPH3 | 7631 | NMRK1 | 10931 | SS18 |
| 1032 | BCL11B | 4332 | GON4L | 7632 | NMRK2 | 10932 | SS18L1 |
| 1033 | BCL2 | 4333 | GOPC | 7633 | NMT1 | 10933 | SSB |
| 1034 | BCL2A1 | 4334 | GORAB | 7634 | NMT2 | 10934 | SSBP1 |
| 1035 | BCL2L1 | 4335 | GORASP1 | 7635 | NMUR1 | 10935 | SSBP2 |
| 1036 | BCL2L10 | 4336 | GORASP2 | 7636 | NMUR2 | 10936 | SSBP3 |
| 1037 | BCL2L11 | 4337 | GOSR1 | 7637 | NNAT | 10937 | SSH1 |
| 1038 | BCL2L12 | 4338 | GOSR2 | 7638 | NNMT | 10938 | SSH2 |
| 1039 | BCL2L13 | 4339 | GOT1 | 7639 | NNT | 10939 | SSH3 |
| 1040 | BCL2L14 | 4340 | GOT2 | 7640 | NNT-AS1 | 10940 | SSNA1 |
| 1041 | BCL2L15 | 4341 | GP1BA | 7641 | NOB1 | 10941 | SSR1 |
| 1042 | BCL2L2 | 4342 | GP1BB | 7642 | NOBOX | 10942 | SSR3 |
| 1043 | BCL2L2-PABPN1 | 4343 | GP2 | 7643 | NOC2L | 10943 | SSR4 |
| 1044 | BCL3 | 4344 | GP5 | 7644 | NOC3L | 10944 | SSRP1 |
| 1045 | BCL6 | 4345 | GP6 | 7645 | NOD1 | 10945 | SST |
| 1046 | BCL6B | 4346 | GP9 | 7646 | NOD2 | 10946 | SSTR1 |
| 1047 | BCL7A | 4347 | GPAA1 | 7647 | NODAL | 10947 | SSTR2 |
| 1048 | BCL7B | 4348 | GPAM | 7648 | NOG | 10948 | SSTR3 |
| 1049 | BCL7C | 4349 | GPANK1 | 7649 | NOL10 | 10949 | SSTR4 |
| 1050 | BCL9 | 4350 | GPAT3 | 7650 | NOL11 | 10950 | SSTR5 |
| 1051 | BCL9L | 4351 | GPAT4 | 7651 | NOL3 | 10951 | SSU72 |
| 1052 | BCLAF1 | 4352 | GPATCH2 | 7652 | NOL6 | 10952 | SSX1 |
| 1053 | BCO1 | 4353 | GPATCH4 | 7653 | NOL8 | 10953 | SSX2 |
| 1054 | BCO2 | 4354 | GPATCH8 | 7654 | NOL9 | 10954 | SSX2IP |
| 1055 | BCOR | 4355 | GPBAR1 | 7655 | NOLC1 | 10955 | SSX5 |
| 1056 | BCORL1 | 4356 | GPBP1 | 7656 | NOM1 | 10956 | ST13 |
| 1057 | BCR | 4357 | GPC1 | 7657 | NOMO1 | 10957 | ST14 |
| 1058 | BCS1L | 4358 | GPC3 | 7658 | NOMO3 | 10958 | ST18 |
| 1059 | BCYRN1 | 4359 | GPC4 | 7659 | NONHSA | 10959 | ST2 |
| 1060 | BDH1 | 4360 | GPC5 | 7660 | NONO | 10960 | ST3GAL1 |
| 1061 | BDKRB1 | 4361 | GPC6 | 7661 | NOP10 | 10961 | ST3GAL3 |
| 1062 | BDKRB2 | 4362 | GPD1 | 7662 | NOP14 | 10962 | ST3GAL4 |
| 1063 | BDNF | 4363 | GPD2 | 7663 | NOP2 | 10963 | ST3GAL5 |
| 1064 | BDP1 | 4364 | GPER1 | 7664 | NOP53 | 10964 | ST6GAL1 |
| 1065 | BEAN1 | 4365 | GPHA2 | 7665 | NOP56 | 10965 | ST6GALNAC5 |
| 1066 | BECN1 | 4366 | GPHN | 7666 | NOP58 | 10966 | ST7 |
| 1067 | BEGAIN | 4367 | GPI | 7667 | NORAD | 10967 | ST8SIA1 |
| 1068 | BEND3 | 4368 | GPIHBP1 | 7668 | NOS1 | 10968 | ST8SIA4 |
| 1069 | BEND5 | 4369 | GPKOW | 7669 | NOS1AP | 10969 | STAB1 |
| 1070 | BEST1 | 4370 | GPLD1 | 7670 | NOS2 | 10970 | STAB2 |
| 1071 | BEST2 | 4371 | GPM6B | 7671 | NOS3 | 10971 | STAC3 |
| 1072 | BET1 | 4372 | GPN1 | 7672 | NOSIP | 10972 | STAG1 |
| 1073 | BET1L | 4373 | GPN3 | 7673 | NOSTRIN | 10973 | STAG2 |
| 1074 | BEX1 | 4374 | GPNMB | 7674 | NOTCH1 | 10974 | STAG3 |
| 1075 | BEX2 | 4375 | GPR101 | 7675 | NOTCH2 | 10975 | STAM |
| 1076 | BEX4 | 4376 | GPR119 | 7676 | NOTCH2NLA | 10976 | STAM2 |
| 1077 | BEX5 | 4377 | GPR132 | 7677 | NOTCH3 | 10977 | STAMBP |
| 1078 | BFAR | 4378 | GPR15 | 7678 | NOTCH4 | 10978 | STAMBPL1 |
| 1079 | BFSP2 | 4379 | GPR151 | 7679 | NOTUM | 10979 | STAP1 |
| 1080 | BGLAP | 4380 | GPR161 | 7680 | NOVA2 | 10980 | STAP2 |
| 1081 | BGN | 4381 | GPR174 | 7681 | NOX1 | 10981 | STAR |
| 1082 | BHLHE40 | 4382 | GPR180 | 7682 | NOX3 | 10982 | STARD3 |
| 1083 | BHLHE41 | 4383 | GPR182 | 7683 | NOX4 | 10983 | STARD3NL |
| 1084 | BHMT | 4384 | GPR1-AS | 7684 | NOX5 | 10984 | STARD4 |
| 1085 | BHMT2 | 4385 | GPR3 | 7685 | NOXA1 | 10985 | STARD5 |
| 1086 | BICC1 | 4386 | GPR31 | 7686 | NOXO1 | 10986 | STARD7 |
| 1087 | BICD1 | 4387 | GPR33 | 7687 | NPAS2 | 10987 | STAT1 |
| 1088 | BICD2 | 4388 | GPR35 | 7688 | NPAS3 | 10988 | STAT2 |
| 1089 | BID | 4389 | GPR37 | 7689 | NPAT | 10989 | STAT3 |
| 1090 | BIK | 4390 | GPR39 | 7690 | NPB | 10990 | STAT4 |
| 1091 | BIN1 | 4391 | GPR4 | 7691 | NPBWR1 | 10991 | STAT5A |
| 1092 | BIN3 | 4392 | GPR55 | 7692 | NPC1 | 10992 | STAT5B |
| 1093 | BIRC2 | 4393 | GPR68 | 7693 | NPC1L1 | 10993 | STAT6 |
| 1094 | BIRC3 | 4394 | GPR87 | 7694 | NPC2 | 10994 | STAU1 |
| 1095 | BIRC5 | 4395 | GPR89A | 7695 | NPDC1 | 10995 | STAU2 |
| 1096 | BIRC6 | 4396 | GPR89B | 7696 | NPEPL1 | 10996 | STBD1 |
| 1097 | BIRC7 | 4397 | GPRASP1 | 7697 | NPEPPS | 10997 | STC1 |
| 1098 | BISPR | 4398 | GPRASP2 | 7698 | NPFF | 10998 | STC2 |
| 1099 | BIVM-ERCC5 | 4399 | GPRC5A | 7699 | NPHP1 | 10999 | STEAP1 |
| 1100 | BLACAT1 | 4400 | GPRC5B | 7700 | NPHP3 | 11000 | STEAP2 |
| 1101 | BLK | 4401 | GPRC5C | 7701 | NPHP3-ACAD11 | 11001 | STEAP3 |
| 1102 | BLM | 4402 | GPRC6A | 7702 | NPHP4 | 11002 | STEAP4 |
| 1103 | BLMH | 4403 | GPRIN2 | 7703 | NPHS1 | 11003 | STH |
| 1104 | BLNK | 4404 | GPS1 | 7704 | NPHS2 | 11004 | STIL |
| 1105 | BLOC1S1 | 4405 | GPS2 | 7705 | NPIPA1 | 11005 | STIM1 |
| 1106 | BLOC1S2 | 4406 | GPSM1 | 7706 | NPL | 11006 | STIM2 |
| 1107 | BLOC1S3 | 4407 | GPSM2 | 7707 | NPLOC4 | 11007 | STIN2-VNTR |
| 1108 | BLOC1S4 | 4408 | GPSM3 | 7708 | NPM1 | 11008 | STING1 |
| 1109 | BLOC1S5 | 4409 | GPT | 7709 | NPNT | 11009 | STIP1 |
| 1110 | BLOC1S6 | 4410 | GPT2 | 7710 | NPPA | 11010 | STK10 |
| 1111 | BLVRA | 4411 | GPX1 | 7711 | NPPB | 11011 | STK11 |
| 1112 | BLVRB | 4412 | GPX2 | 7712 | NPPC | 11012 | STK11IP |
| 1113 | BLZF1 | 4413 | GPX3 | 7713 | NPR1 | 11013 | STK16 |
| 1114 | BMF | 4414 | GPX4 | 7714 | NPR2 | 11014 | STK17A |
| 1115 | BMI1 | 4415 | GPX5 | 7715 | NPR3 | 11015 | STK24 |
| 1116 | BMP1 | 4416 | GPX6 | 7716 | NPRL2 | 11016 | STK25 |
| 1117 | BMP15 | 4417 | GPX7 | 7717 | NPRL3 | 11017 | STK26 |
| 1118 | BMP2 | 4418 | GPX8 | 7718 | NPS | 11018 | STK3 |
| 1119 | BMP2K | 4419 | GRAMD1A | 7719 | NPSR1-AS1 | 11019 | STK32A |
| 1120 | BMP2KL | 4420 | GRAMD1C | 7720 | NPTN | 11020 | STK32B |
| 1121 | BMP3 | 4421 | GRAMD2B | 7721 | NPTX1 | 11021 | STK33 |
| 1122 | BMP4 | 4422 | GRAMD4 | 7722 | NPTX2 | 11022 | STK35 |
| 1123 | BMP5 | 4423 | GRAP | 7723 | NPY | 11023 | STK36 |
| 1124 | BMP6 | 4424 | GRAP2 | 7724 | NPY1R | 11024 | STK38 |
| 1125 | BMP7 | 4425 | GRB10 | 7725 | NPY4R | 11025 | STK38L |
| 1126 | BMPER | 4426 | GRB14 | 7726 | NPY5R | 11026 | STK39 |
| 1127 | BMPR1A | 4427 | GRB2 | 7727 | NQO1 | 11027 | STK4 |
| 1128 | BMPR1B | 4428 | GRB7 | 7728 | NQO2 | 11028 | STMN1 |
| 1129 | BMPR2 | 4429 | GREB1 | 7729 | NR0B1 | 11029 | STMN2 |
| 1130 | BMS1 | 4430 | GREB1L | 7730 | NR0B2 | 11030 | STN1 |
| 1131 | BMX | 4431 | GREM1 | 7731 | NR1D1 | 11031 | STOM |
| 1132 | BNC1 | 4432 | GREM2 | 7732 | NR1D2 | 11032 | STOML1 |
| 1133 | BNC2 | 4433 | GRHL1 | 7733 | NR1H2 | 11033 | STOML2 |
| 1134 | BNIP1 | 4434 | GRHL2 | 7734 | NR1H3 | 11034 | STOX1 |
| 1135 | BNIP2 | 4435 | GRHL3 | 7735 | NR1H4 | 11035 | STOX2 |
| 1136 | BNIP3 | 4436 | GRHPR | 7736 | NR1I2 | 11036 | STRA6 |
| 1137 | BNIP3L | 4437 | GRIA2 | 7737 | NR1I3 | 11037 | STRA8 |
| 1138 | BNIPL | 4438 | GRIA3 | 7738 | NR2C1 | 11038 | STRADA |
| 1139 | BOC | 4439 | GRIA4 | 7739 | NR2C2 | 11039 | STRADB |
| 1140 | BOD1L1 | 4440 | GRID2 | 7740 | NR2E1 | 11040 | STRAP |
| 1141 | BOK | 4441 | GRIK1 | 7741 | NR2E3 | 11041 | STRBP |
| 1142 | BOLA3 | 4442 | GRIK2 | 7742 | NR2F1 | 11042 | STRIP1 |
| 1143 | BOP1 | 4443 | GRIK3 | 7743 | NR2F2 | 11043 | STRN |
| 1144 | BORA | 4444 | GRIN1 | 7744 | NR2F6 | 11044 | STRN3 |
| 1145 | BORCS5 | 4445 | GRIN2A | 7745 | NR3C1 | 11045 | STS |
| 1146 | BORCS6 | 4446 | GRIN2B | 7746 | NR3C2 | 11046 | STT3A |
| 1147 | BPI | 4447 | GRIN2C | 7747 | NR4A1 | 11047 | STT3B |
| 1148 | BPIFA1 | 4448 | GRIN3A | 7748 | NR4A2 | 11048 | STUB1 |
| 1149 | BPIFB1 | 4449 | GRIN3B | 7749 | NR4A3 | 11049 | STX10 |
| 1150 | BPTF | 4450 | GRINA | 7750 | NR5A1 | 11050 | STX11 |
| 1151 | BRAF | 4451 | GRIPAP1 | 7751 | NR5A2 | 11051 | STX12 |
| 1152 | BRAP | 4452 | GRK1 | 7752 | NRAS | 11052 | STX16 |
| 1153 | BRCA1 | 4453 | GRK2 | 7753 | NRBF2 | 11053 | STX17 |
| 1154 | BRCA2 | 4454 | GRK3 | 7754 | NRBP1 | 11054 | STX18 |
| 1155 | BRCC3 | 4455 | GRK4 | 7755 | NRBP2 | 11055 | STX1A |
| 1156 | BRD1 | 4456 | GRK5 | 7756 | NRDC | 11056 | STX2 |
| 1157 | BRD2 | 4457 | GRK6 | 7757 | NREP | 11057 | STX3 |
| 1158 | BRD3 | 4458 | GRM1 | 7758 | NRF1 | 11058 | STX4 |
| 1159 | BRD4 | 4459 | GRM2 | 7759 | NRG1 | 11059 | STX5 |
| 1160 | BRD7 | 4460 | GRM4 | 7760 | NRG2 | 11060 | STX7 |
| 1161 | BRD8 | 4461 | GRM5 | 7761 | NRG4 | 11061 | STX8 |
| 1162 | BRD9 | 4462 | GRM6 | 7762 | NRGN | 11062 | STXBP1 |
| 1163 | BRDT | 4463 | GRN | 7763 | NRIP1 | 11063 | STXBP2 |
| 1164 | BRF1 | 4464 | GRP | 7764 | NRIR | 11064 | STXBP3 |
| 1165 | BRINP1 | 4465 | GRPEL1 | 7765 | NRL | 11065 | STXBP4 |
| 1166 | BRINP3 | 4466 | GRPR | 7766 | NRN1 | 11066 | STXBP5 |
| 1167 | BRIP1 | 4467 | GRSF1 | 7767 | NRON | 11067 | STYX |
| 1168 | BRMS1 | 4468 | GRWD1 | 7768 | NRP1 | 11068 | SUB1 |
| 1169 | BRMS1L | 4469 | GSAP | 7769 | NRP2 | 11069 | SUCLA2 |
| 1170 | BRPF1 | 4470 | GSDMA | 7770 | NRTN | 11070 | SUCLG1 |
| 1171 | BRPF3 | 4471 | GSDMB | 7771 | NRXN1 | 11071 | SUCLG2 |
| 1172 | BRS3 | 4472 | GSDMD | 7772 | NRXN2 | 11072 | SUCNR1 |
| 1173 | BRSK1 | 4473 | GSDME | 7773 | NRXN3 | 11073 | SUDS3 |
| 1174 | BRWD1 | 4474 | GSE1 | 7774 | NSA2 | 11074 | SUFU |
| 1175 | BRWD3 | 4475 | GSK3A | 7775 | NSD1 | 11075 | SUGCT |
| 1176 | BSCL2 | 4476 | GSK3B | 7776 | NSD2 | 11076 | SUGP1 |
| 1177 | BSDC1 | 4477 | GSN | 7777 | NSD3 | 11077 | SUGP2 |
| 1178 | BSG | 4478 | GSPT1 | 7778 | NSDHL | 11078 | SUGT1 |
| 1179 | BSND | 4479 | GSR | 7779 | NSF | 11079 | SULF1 |
| 1180 | BST1 | 4480 | GSS | 7780 | NSFL1C | 11080 | SULF2 |
| 1181 | BST2 | 4481 | GSTA1 | 7781 | NSL1 | 11081 | SULT1A1 |
| 1182 | BTAF1 | 4482 | GSTA2 | 7782 | NSMCE1 | 11082 | SULT1A2 |
| 1183 | BTBD10 | 4483 | GSTA3 | 7783 | NSMCE2 | 11083 | SULT1A3 |
| 1184 | BTBD16 | 4484 | GSTA4 | 7784 | NSMCE3 | 11084 | SULT1A4 |
| 1185 | BTBD2 | 4485 | GSTA5 | 7785 | NSMCE4A | 11085 | SULT1C2 |
| 1186 | BTBD6 | 4486 | GSTK1 | 7786 | NSMF | 11086 | SULT1E1 |
| 1187 | BTC | 4487 | GSTM1 | 7787 | NSRP1 | 11087 | SULT2A1 |
| 1188 | BTD | 4488 | GSTM2 | 7788 | NSUN2 | 11088 | SULT2B1 |
| 1189 | BTF3 | 4489 | GSTM3 | 7789 | NSUN4 | 11089 | SULT6B1 |
| 1190 | BTG1 | 4490 | GSTM4 | 7790 | NSUN5 | 11090 | SUMF1 |
| 1191 | BTG2 | 4491 | GSTM5 | 7791 | NT5C | 11091 | SUMF2 |
| 1192 | BTG3 | 4492 | GSTO1 | 7792 | NT5C1A | 11092 | SUMO1 |
| 1193 | BTG4 | 4493 | GSTO2 | 7793 | NT5C1B | 11093 | SUMO2 |
| 1194 | BTK | 4494 | GSTP1 | 7794 | NT5C2 | 11094 | SUMO3 |
| 1195 | BTLA | 4495 | GSTT1 | 7795 | NT5C3A | 11095 | SUMO4 |
| 1196 | BTNL2 | 4496 | GSTT2 | 7796 | NT5DC2 | 11096 | SUN1 |
| 1197 | BTRC | 4497 | GSTZ1 | 7797 | NT5E | 11097 | SUN2 |
| 1198 | BUB1 | 4498 | GTF2A1 | 7798 | NT5M | 11098 | SUOX |
| 1199 | BUB1B | 4499 | GTF2A1L | 7799 | NTF3 | 11099 | SUPT16H |
| 1200 | BUB3 | 4500 | GTF2A2 | 7800 | NTF4 | 11100 | SUPT20H |
| 1201 | BUD13 | 4501 | GTF2B | 7801 | NTHL1 | 11101 | SUPT3H |
| 1202 | BUD23 | 4502 | GTF2E1 | 7802 | NTM | 11102 | SUPT5H |
| 1203 | BUD31 | 4503 | GTF2E2 | 7803 | NTMT1 | 11103 | SUPT6H |
| 1204 | BVES | 4504 | GTF2F1 | 7804 | NTN1 | 11104 | SUPT7L |
| 1205 | BYSL | 4505 | GTF2F2 | 7805 | NTN3 | 11105 | SURF1 |
| 1206 | BZW1 | 4506 | GTF2H1 | 7806 | NTNG1 | 11106 | SURF2 |
| 1207 | BZW2 | 4507 | GTF2H2 | 7807 | NTNG2 | 11107 | SURF4 |
| 1208 | C10orf90 | 4508 | GTF2H2C | 7808 | NTPCR | 11108 | SURF6 |
| 1209 | C11orf54 | 4509 | GTF2H3 | 7809 | NTRK1 | 11109 | SUV39H1 |
| 1210 | C11orf58 | 4510 | GTF2H4 | 7810 | NTRK2 | 11110 | SUV39H2 |
| 1211 | C11orf68 | 4511 | GTF2H5 | 7811 | NTRK3 | 11111 | SUZ12 |
| 1212 | C11orf95 | 4512 | GTF2I | 7812 | NTS | 11112 | SUZ12P1 |
| 1213 | C12orf4 | 4513 | GTF2IRD1 | 7813 | NTSR1 | 11113 | SV2A |
| 1214 | C12orf43 | 4514 | GTF3A | 7814 | NUAK1 | 11114 | SV2C |
| 1215 | C12orf45 | 4515 | GTF3C1 | 7815 | NUAK2 | 11115 | SVBP |
| 1216 | C12orf54 | 4516 | GTF3C2 | 7816 | NUB1 | 11116 | SVEP1 |
| 1217 | C12orf57 | 4517 | GTF3C4 | 7817 | NUBP1 | 11117 | SVIL |
| 1218 | C12orf65 | 4518 | GTF3C5 | 7818 | NUBP2 | 11118 | SVIP |
| 1219 | C12orf66 | 4519 | GTPBP1 | 7819 | NUBPL | 11119 | SVOPL |
| 1220 | C15orf39 | 4520 | GTPBP10 | 7820 | NUCB2 | 11120 | SWI5 |
| 1221 | C15orf40 | 4521 | GTPBP2 | 7821 | NUCKS1 | 11121 | SWT1 |
| 1222 | C16orf72 | 4522 | GTPBP3 | 7822 | NUDC | 11122 | SYAP1 |
| 1223 | C16orf95 | 4523 | GTPBP4 | 7823 | NUDCD3 | 11123 | SYBU |
| 1224 | C17orf49 | 4524 | GTSE1 | 7824 | NUDT1 | 11124 | SYCE1 |
| 1225 | C17orf75 | 4525 | GUCA1A | 7825 | NUDT10 | 11125 | SYCN |
| 1226 | C19orf12 | 4526 | GUCA2A | 7826 | NUDT11 | 11126 | SYCP1 |
| 1227 | C19orf33 | 4527 | GUCA2B | 7827 | NUDT15 | 11127 | SYCP3 |
| 1228 | C19orf48 | 4528 | GUCY1A1 | 7828 | NUDT16L1 | 11128 | SYF2 |
| 1229 | C19orf54 | 4529 | GUCY1B1 | 7829 | NUDT21 | 11129 | SYK |
| 1230 | C19orf57 | 4530 | GUCY2C | 7830 | NUDT3 | 11130 | SYMPK |
| 1231 | C19orf81 | 4531 | GUCY2D | 7831 | NUDT5 | 11131 | SYN1 |
| 1232 | C1D | 4532 | GUF1 | 7832 | NUDT6 | 11132 | SYN2 |
| 1233 | C1GALT1 | 4533 | GUK1 | 7833 | NUDT9 | 11133 | SYNCRIP |
| 1234 | C1GALT1C1 | 4534 | GULOP | 7834 | NUFIP1 | 11134 | SYNE1 |
| 1235 | C1orf112 | 4535 | GULP1 | 7835 | NUFIP2 | 11135 | SYNE2 |
| 1236 | C1orf174 | 4536 | GUSB | 7836 | NUGGC | 11136 | SYNE3 |
| 1237 | C1orf194 | 4537 | GUSBP15 | 7837 | NUMA1 | 11137 | SYNE4 |
| 1238 | C1orf210 | 4538 | GUSBP2 | 7838 | NUMB | 11138 | SYNGAP1 |
| 1239 | C1orf220 | 4539 | GUSBP4 | 7839 | NUMBL | 11139 | SYNGR1 |
| 1240 | C1orf226 | 4540 | GYG1 | 7840 | NUP107 | 11140 | SYNGR2 |
| 1241 | C1orf43 | 4541 | GYG2 | 7841 | NUP133 | 11141 | SYNGR3 |
| 1242 | C1orf52 | 4542 | GYPA | 7842 | NUP153 | 11142 | SYNJ1 |
| 1243 | C1orf54 | 4543 | GYPB | 7843 | NUP155 | 11143 | SYNJ2 |
| 1244 | C1orf56 | 4544 | GYPC | 7844 | NUP160 | 11144 | SYNM |
| 1245 | C1QA | 4545 | GYPE | 7845 | NUP188 | 11145 | SYNPO |
| 1246 | C1QB | 4546 | GYS1 | 7846 | NUP205 | 11146 | SYNPO2 |
| 1247 | C1QBP | 4547 | GYS2 | 7847 | NUP210 | 11147 | SYNRG |
| 1248 | C1QC | 4548 | GZF1 | 7848 | NUP214 | 11148 | SYP |
| 1249 | C1QTNF1 | 4549 | GZMA | 7849 | NUP35 | 11149 | SYS1 |
| 1250 | C1QTNF3 | 4550 | GZMB | 7850 | NUP37 | 11150 | SYT1 |
| 1251 | C1QTNF3-AMACR | 4551 | GZMH | 7851 | NUP42 | 11151 | SYT10 |
| 1252 | C1QTNF5 | 4552 | GZMK | 7852 | NUP43 | 11152 | SYT11 |
| 1253 | C1QTNF6 | 4553 | GZMM | 7853 | NUP50 | 11153 | SYT12 |
| 1254 | C1QTNF9 | 4554 | H1-0 | 7854 | NUP54 | 11154 | SYT14 |
| 1255 | C1QTNF9B | 4555 | H1-1 | 7855 | NUP58 | 11155 | SYT3 |
| 1256 | C1R | 4556 | H1-10 | 7856 | NUP62 | 11156 | SYT4 |
| 1257 | C1S | 4557 | H1-2 | 7857 | NUP85 | 11157 | SYT7 |
| 1258 | C2 | 4558 | H1-3 | 7858 | NUP88 | 11158 | SYT9 |
| 1259 | C20orf204 | 4559 | H1-4 | 7859 | NUP93 | 11159 | SYTL1 |
| 1260 | C21orf58 | 4560 | H1-5 | 7860 | NUP98 | 11160 | SYTL2 |
| 1261 | C2CD3 | 4561 | H1-6 | 7861 | NUPR1 | 11161 | SYTL3 |
| 1262 | C2CD4A | 4562 | H19 | 7862 | NUS1 | 11162 | SYTL4 |
| 1263 | C2CD5 | 4563 | H19-ICR | 7863 | NUSAP1 | 11163 | SYTL5 |
| 1264 | C2orf49 | 4564 | H2AC1 | 7864 | NUTF2 | 11164 | SYVN1 |
| 1265 | C3 | 4565 | H2AC11 | 7865 | NUTM1 | 11165 | SZRD1 |
| 1266 | C3AR1 | 4566 | H2AC12 | 7866 | NVL | 11166 | SZT2 |
| 1267 | C3orf35 | 4567 | H2AC13 | 7867 | NWD1 | 11167 | TAAR1 |
| 1268 | C3orf38 | 4568 | H2AC14 | 7868 | NXF1 | 11168 | TAB1 |
| 1269 | C4A | 4569 | H2AC15 | 7869 | NXN | 11169 | TAB2 |
| 1270 | C4B | 4570 | H2AC16 | 7870 | NXNL1 | 11170 | TAB3 |
| 1271 | C4B_2 | 4571 | H2AC17 | 7871 | NXPH4 | 11171 | TAC1 |
| 1272 | C4BPA | 4572 | H2AC18 | 7872 | OARD1 | 11172 | TAC3 |
| 1273 | C4BPB | 4573 | H2AC19 | 7873 | OAS1 | 11173 | TACC1 |
| 1274 | C5 | 4574 | H2AC20 | 7874 | OAS3 | 11174 | TACC2 |
| 1275 | C5AR1 | 4575 | H2AC21 | 7875 | OAT | 11175 | TACC3 |
| 1276 | C5AR2 | 4576 | H2AC4 | 7876 | OAZ1 | 11176 | TACO1 |
| 1277 | C5orf15 | 4577 | H2AC6 | 7877 | OBI1 | 11177 | TACR1 |
| 1278 | C6 | 4578 | H2AC7 | 7878 | OBSCN | 11178 | TACR2 |
| 1279 | C6orf120 | 4579 | H2AC8 | 7879 | OBSL1 | 11179 | TACR3 |
| 1280 | C6orf89 | 4580 | H2AJ | 7880 | OCA2 | 11180 | TACSTD2 |
| 1281 | C7 | 4581 | H2AW | 7881 | OCIAD1 | 11181 | TADA2A |
| 1282 | C7orf26 | 4582 | H2AX | 7882 | OCIAD2 | 11182 | TADA2B |
| 1283 | C7orf50 | 4583 | H2AZ1 | 7883 | OCLN | 11183 | TADA3 |
| 1284 | C8A | 4584 | H2AZ2 | 7884 | OCM | 11184 | TAF1 |
| 1285 | C8B | 4585 | H2BC1 | 7885 | OCM2 | 11185 | TAF10 |
| 1286 | C8G | 4586 | H2BC10 | 7886 | OCRL | 11186 | TAF11 |
| 1287 | C8orf37 | 4587 | H2BC11 | 7887 | ODC1 | 11187 | TAF12 |
| 1288 | C8orf82 | 4588 | H2BC12 | 7888 | ODR4 | 11188 | TAF13 |
| 1289 | C9 | 4589 | H2BC13 | 7889 | OFD1 | 11189 | TAF15 |
| 1290 | C9orf116 | 4590 | H2BC14 | 7890 | OGA | 11190 | TAF1A |
| 1291 | C9orf40 | 4591 | H2BC15 | 7891 | OGDH | 11191 | TAF1B |
| 1292 | C9orf72 | 4592 | H2BC17 | 7892 | OGFOD1 | 11192 | TAF1C |
| 1293 | C9orf78 | 4593 | H2BC18 | 7893 | OGFR | 11193 | TAF1L |
| 1294 | CA1 | 4594 | H2BC19P | 7894 | OGG1 | 11194 | TAF3 |
| 1295 | CA12 | 4595 | H2BC20P | 7895 | OGN | 11195 | TAF4 |
| 1296 | CA14 | 4596 | H2BC21 | 7896 | OGT | 11196 | TAF5 |
| 1297 | CA2 | 4597 | H2BC3 | 7897 | OIP5 | 11197 | TAF6 |
| 1298 | CA3 | 4598 | H2BC4 | 7898 | OLA1 | 11198 | TAF6L |
| 1299 | CA4 | 4599 | H2BC5 | 7899 | OLFM1 | 11199 | TAF7 |
| 1300 | CA5A | 4600 | H2BC6 | 7900 | OLFM2 | 11200 | TAF8 |
| 1301 | CA5B | 4601 | H2BC7 | 7901 | OLFM3 | 11201 | TAF9 |
| 1302 | CA6 | 4602 | H2BC8 | 7902 | OLFML3 | 11202 | TAFA5 |
| 1303 | CA7 | 4603 | H2BC9 | 7903 | OLIG1 | 11203 | TAGAP |
| 1304 | CA8 | 4604 | H2BS1 | 7904 | OLIG2 | 11204 | TAGLN |
| 1305 | CA9 | 4605 | H2BU1 | 7905 | OLR1 | 11205 | TAGLN2 |
| 1306 | CAAP1 | 4606 | H3-2 | 7906 | OMA1 | 11206 | TALDO1 |
| 1307 | CABIN1 | 4607 | H3-3A | 7907 | OMD | 11207 | TAMM41 |
| 1308 | CABP2 | 4608 | H3-3B | 7908 | OMG | 11208 | TANC1 |
| 1309 | CABP4 | 4609 | H3-4 | 7909 | OMP | 11209 | TANC2 |
| 1310 | CABP5 | 4610 | H3C1 | 7910 | ONECUT1 | 11210 | TANGO2 |
| 1311 | CABYR | 4611 | H3C10 | 7911 | ONECUT2 | 11211 | TANK |
| 1312 | CACNA1A | 4612 | H3C11 | 7912 | OOEP | 11212 | TAOK1 |
| 1313 | CACNA1C | 4613 | H3C12 | 7913 | OPA1 | 11213 | TAOK2 |
| 1314 | CACNA1D | 4614 | H3C13 | 7914 | OPA3 | 11214 | TAOK3 |
| 1315 | CACNA1E | 4615 | H3C14 | 7915 | OPCML | 11215 | TAP1 |
| 1316 | CACNA1F | 4616 | H3C15 | 7916 | OPLAH | 11216 | TAP2 |
| 1317 | CACNA1G | 4617 | H3C2 | 7917 | OPN1LW | 11217 | TAPBP |
| 1318 | CACNA1H | 4618 | H3C3 | 7918 | OPN4 | 11218 | TAPT1 |
| 1319 | CACNA1I | 4619 | H3C4 | 7919 | OPRD1 | 11219 | TARBP1 |
| 1320 | CACNA1S | 4620 | H3C6 | 7920 | OPRK1 | 11220 | TARBP2 |
| 1321 | CACNA2D1 | 4621 | H3C7 | 7921 | OPRL1 | 11221 | TARDBP |
| 1322 | CACNA2D2 | 4622 | H3C8 | 7922 | OPRM1 | 11222 | TARID |
| 1323 | CACNA2D3 | 4623 | H4-16 | 7923 | OPTC | 11223 | TARS1 |
| 1324 | CACNB1 | 4624 | H4C1 | 7924 | OPTN | 11224 | TARS2 |
| 1325 | CACNB2 | 4625 | H4C11 | 7925 | OR1E2 | 11225 | TARS3 |
| 1326 | CACNB3 | 4626 | H4C12 | 7926 | OR51B4 | 11226 | TAS1R2 |
| 1327 | CACNG1 | 4627 | H4C13 | 7927 | OR51E2 | 11227 | TAS1R3 |
| 1328 | CACTIN | 4628 | H4C14 | 7928 | OR51F1 | 11228 | TAS2R20 |
| 1329 | CACUL1 | 4629 | H4C15 | 7929 | OR52L1 | 11229 | TAS2R38 |
| 1330 | CACYBP | 4630 | H4C2 | 7930 | OR5H2 | 11230 | TASOR |
| 1331 | CAD | 4631 | H4C3 | 7931 | ORAI1 | 11231 | TASOR2 |
| 1332 | CADM1 | 4632 | H4C4 | 7932 | ORAI2 | 11232 | TASP1 |
| 1333 | CADM2 | 4633 | H4C5 | 7933 | ORC1 | 11233 | TAT |
| 1334 | CADM3 | 4634 | H4C6 | 7934 | ORC2 | 11234 | TATDN1 |
| 1335 | CADM4 | 4635 | H4C7 | 7935 | ORC3 | 11235 | TAX1BP1 |
| 1336 | CADPS | 4636 | H4C8 | 7936 | ORC4 | 11236 | TAX1BP3 |
| 1337 | CAGE1 | 4637 | H4C9 | 7937 | ORC5 | 11237 | TAZ |
| 1338 | CALB1 | 4638 | H6PD | 7938 | ORM1 | 11238 | TBC1D1 |
| 1339 | CALB2 | 4639 | HAAO | 7939 | ORMDL1 | 11239 | TBC1D10B |
| 1340 | CALCA | 4640 | HABP2 | 7940 | ORMDL3 | 11240 | TBC1D15 |
| 1341 | CALCB | 4641 | HABP4 | 7941 | OS9 | 11241 | TBC1D17 |
| 1342 | CALCOCO1 | 4642 | HACD1 | 7942 | OSBP | 11242 | TBC1D2 |
| 1343 | CALCOCO2 | 4643 | HACD2 | 7943 | OSBP2 | 11243 | TBC1D20 |
| 1344 | CALCR | 4644 | HACD3 | 7944 | OSBPL10 | 11244 | TBC1D22A |
| 1345 | CALCRL | 4645 | HACE1 | 7945 | OSBPL11 | 11245 | TBC1D22B |
| 1346 | CALD1 | 4646 | HACL1 | 7946 | OSBPL1A | 11246 | TBC1D23 |
| 1347 | CALM1 | 4647 | HADH | 7947 | OSBPL2 | 11247 | TBC1D24 |
| 1348 | CALM2 | 4648 | HADHA | 7948 | OSBPL3 | 11248 | TBC1D25 |
| 1349 | CALM3 | 4649 | HADHB | 7949 | OSBPL5 | 11249 | TBC1D2B |
| 1350 | CALML3 | 4650 | HAGH | 7950 | OSBPL6 | 11250 | TBC1D3 |
| 1351 | CALML4 | 4651 | HAGLR | 7951 | OSBPL8 | 11251 | TBC1D3D |
| 1352 | CALML5 | 4652 | HAL | 7952 | OSBPL9 | 11252 | TBC1D4 |
| 1353 | CALML6 | 4653 | HAMP | 7953 | OSCP1 | 11253 | TBC1D5 |
| 1354 | CALN1 | 4654 | HAND2 | 7954 | OSGEP | 11254 | TBC1D7 |
| 1355 | CALR | 4655 | HAND2-AS1 | 7955 | OSGIN1 | 11255 | TBC1D8B |
| 1356 | CALR3 | 4656 | HAO1 | 7956 | OSGIN2 | 11256 | TBC1D9 |
| 1357 | CALU | 4657 | HAP1 | 7957 | OSM | 11257 | TBC1D9B |
| 1358 | CAMK1 | 4658 | HAPLN1 | 7958 | OSMR | 11258 | TBCCD1 |
| 1359 | CAMK1G | 4659 | HAR1B | 7959 | OSTF1 | 11259 | TBCD |
| 1360 | CAMK2A | 4660 | HARS1 | 7960 | OSTM1 | 11260 | TBCE |
| 1361 | CAMK2B | 4661 | HAS1 | 7961 | OTC | 11261 | TBCK |
| 1362 | CAMK2D | 4662 | HAS2 | 7962 | OTOGL | 11262 | TBK1 |
| 1363 | CAMK2G | 4663 | HASPIN | 7963 | OTUB1 | 11263 | TBKBP1 |
| 1364 | CAMK2N2 | 4664 | HAT1 | 7964 | OTUD4 | 11264 | TBL1X |
| 1365 | CAMK4 | 4665 | HAUS1 | 7965 | OTUD5 | 11265 | TBL1XR1 |
| 1366 | CAMKK1 | 4666 | HAUS4 | 7966 | OTUD7A | 11266 | TBL2 |
| 1367 | CAMKK2 | 4667 | HAUS6 | 7967 | OTUD7B | 11267 | TBL3 |
| 1368 | CAMKMT | 4668 | HAVCR1 | 7968 | OTULIN | 11268 | TBP |
| 1369 | CAMLG | 4669 | HAVCR2 | 7969 | OTX1 | 11269 | TBPL1 |
| 1370 | CAMP | 4670 | HAX1 | 7970 | OTX2 | 11270 | TBRG1 |
| 1371 | CAMSAP1 | 4671 | HBA1 | 7971 | OVCA2 | 11271 | TBRG4 |
| 1372 | CAMSAP2 | 4672 | HBA2 | 7972 | OVGP1 | 11272 | TBX1 |
| 1373 | CAMSAP3 | 4673 | HBB | 7973 | OVOL2 | 11273 | TBX18 |
| 1374 | CAMTA1 | 4674 | HBB-LCR | 7974 | OXA1L | 11274 | TBX19 |
| 1375 | CAMTA2 | 4675 | HBD | 7975 | OXCT1 | 11275 | TBX2 |
| 1376 | CAND1 | 4676 | HBE1 | 7976 | OXER1 | 11276 | TBX20 |
| 1377 | CAND2 | 4677 | HBEGF | 7977 | OXR1 | 11277 | TBX21 |
| 1378 | CANT1 | 4678 | HBG1 | 7978 | OXSM | 11278 | TBX3 |
| 1379 | CANX | 4679 | HBG2 | 7979 | OXSR1 | 11279 | TBX4 |
| 1380 | CAP1 | 4680 | HBP1 | 7980 | OXT | 11280 | TBX5 |
| 1381 | CAP2 | 4681 | HBQ1 | 7981 | OXTR | 11281 | TBXA2R |
| 1382 | CAPG | 4682 | HBS1L | 7982 | P2RX1 | 11282 | TBXAS1 |
| 1383 | CAPN1 | 4683 | HBZ | 7983 | P2RX2 | 11283 | TBXT |
| 1384 | CAPN10 | 4684 | HCAR1 | 7984 | P2RX3 | 11284 | TCAF1 |
| 1385 | CAPN14 | 4685 | HCAR2 | 7985 | P2RX4 | 11285 | TCAP |
| 1386 | CAPN15 | 4686 | HCCS | 7986 | P2RX5 | 11286 | TCEA1 |
| 1387 | CAPN2 | 4687 | HCFC1 | 7987 | P2RX7 | 11287 | TCEA2 |
| 1388 | CAPN3 | 4688 | HCG11 | 7988 | P2RY1 | 11288 | TCEA3 |
| 1389 | CAPN5 | 4689 | HCG26 | 7989 | P2RY11 | 11289 | TCEAL1 |
| 1390 | CAPN6 | 4690 | HCG4 | 7990 | P2RY12 | 11290 | TCEAL2 |
| 1391 | CAPNS1 | 4691 | HCG4B | 7991 | P2RY14 | 11291 | TCEAL4 |
| 1392 | CAPRIN1 | 4692 | HCK | 7992 | P2RY2 | 11292 | TCERG1 |
| 1393 | CAPS | 4693 | HCLS1 | 7993 | P2RY4 | 11293 | TCF12 |
| 1394 | CAPSL | 4694 | HCN1 | 7994 | P2RY6 | 11294 | TCF15 |
| 1395 | CAPZA1 | 4695 | HCN4 | 7995 | P3H1 | 11295 | TCF19 |
| 1396 | CAPZA2 | 4696 | HCP5 | 7996 | P3H2 | 11296 | TCF20 |
| 1397 | CAPZB | 4697 | HCRT | 7997 | P3H3 | 11297 | TCF21 |
| 1398 | CARD10 | 4698 | HCST | 7998 | P4HA1 | 11298 | TCF25 |
| 1399 | CARD11 | 4699 | HDAC1 | 7999 | P4HA2 | 11299 | TCF3 |
| 1400 | CARD14 | 4700 | HDAC10 | 8000 | P4HA3 | 11300 | TCF4 |
| 1401 | CARD16 | 4701 | HDAC11 | 8001 | P4HB | 11301 | TCF7 |
| 1402 | CARD19 | 4702 | HDAC2 | 8002 | P4HTM | 11302 | TCF7L1 |
| 1403 | CARD8 | 4703 | HDAC3 | 8003 | PA2G4 | 11303 | TCF7L2 |
| 1404 | CARD9 | 4704 | HDAC4 | 8004 | PAAF1 | 11304 | TCHH |
| 1405 | CARF | 4705 | HDAC5 | 8005 | PABPC1 | 11305 | TCHP |
| 1406 | CARHSP1 | 4706 | HDAC6 | 8006 | PABPC1P2 | 11306 | TCIRG1 |
| 1407 | CARM1 | 4707 | HDAC7 | 8007 | PABPC4 | 11307 | TCL1A |
| 1408 | CARMIL1 | 4708 | HDAC8 | 8008 | PABPN1 | 11308 | TCN1 |
| 1409 | CARMIL2 | 4709 | HDAC9 | 8009 | PACERR | 11309 | TCN2 |
| 1410 | CARNMT1 | 4710 | HDC | 8010 | PACRG | 11310 | TCOF1 |
| 1411 | CARS1 | 4711 | HDGF | 8011 | PACS1 | 11311 | TCP1 |
| 1412 | CARS2 | 4712 | HDGFL2 | 8012 | PACS2 | 11312 | TCTE1 |
| 1413 | CARTPT | 4713 | HDGFL3 | 8013 | PACSIN2 | 11313 | TCTE3 |
| 1414 | CASC15 | 4714 | HDLBP | 8014 | PACSIN3 | 11314 | TCTEX1D2 |
| 1415 | CASC2 | 4715 | HEATR3 | 8015 | PADI2 | 11315 | TCTN1 |
| 1416 | CASC3 | 4716 | HEATR5B | 8016 | PADI4 | 11316 | TCTN2 |
| 1417 | CASC9 | 4717 | HEATR6 | 8017 | PAEP | 11317 | TCTN3 |
| 1418 | CASD1 | 4718 | HECTD1 | 8018 | PAF1 | 11318 | TDG |
| 1419 | CASK | 4719 | HECTD3 | 8019 | PAFAH1B1 | 11319 | TDGF1 |
| 1420 | CASKIN1 | 4720 | HECTD4 | 8020 | PAFAH1B2 | 11320 | TDGF1P3 |
| 1421 | CASKIN2 | 4721 | HECW2 | 8021 | PAFAH2 | 11321 | TDO2 |
| 1422 | CASP1 | 4722 | HEIH | 8022 | PAGE4 | 11322 | TDP1 |
| 1423 | CASP10 | 4723 | HELB | 8023 | PAGR1 | 11323 | TDP2 |
| 1424 | CASP12 | 4724 | HELLPAR | 8024 | PAH | 11324 | TDRD1 |
| 1425 | CASP14 | 4725 | HELLS | 8025 | PAICS | 11325 | TDRD15 |
| 1426 | CASP2 | 4726 | HELQ | 8026 | PAIP2 | 11326 | TDRD3 |
| 1427 | CASP3 | 4727 | HELZ | 8027 | PAK1 | 11327 | TDRD5 |
| 1428 | CASP4 | 4728 | HELZ2 | 8028 | PAK1IP1 | 11328 | TDRKH |
| 1429 | CASP5 | 4729 | HEPACAM | 8029 | PAK2 | 11329 | TEAD1 |
| 1430 | CASP6 | 4730 | HEPH | 8030 | PAK3 | 11330 | TEAD3 |
| 1431 | CASP7 | 4731 | HERC1 | 8031 | PAK4 | 11331 | TEAD4 |
| 1432 | CASP8 | 4732 | HERC2 | 8032 | PAK5 | 11332 | TEC |
| 1433 | CASP8AP2 | 4733 | HERC4 | 8033 | PAK6 | 11333 | TECPR1 |
| 1434 | CASP9 | 4734 | HERC5 | 8034 | PALB2 | 11334 | TECPR2 |
| 1435 | CASQ1 | 4735 | HERPUD1 | 8035 | PALD1 | 11335 | TECR |
| 1436 | CASQ2 | 4736 | HES1 | 8036 | PALLD | 11336 | TECTB |
| 1437 | CASR | 4737 | HES3 | 8037 | PALM | 11337 | TEF |
| 1438 | CAST | 4738 | HES4 | 8038 | PALM2AKAP2 | 11338 | TEFM |
| 1439 | CASZ1 | 4739 | HES5 | 8039 | PALM3 | 11339 | TEK |
| 1440 | CAT | 4740 | HES7 | 8040 | PALMD | 11340 | TEKT1 |
| 1441 | CATSPER1 | 4741 | HESX1 | 8041 | PAM | 11341 | TEKT2 |
| 1442 | CATSPER2 | 4742 | HEXA | 8042 | PAM16 | 11342 | TEKT3 |
| 1443 | CAV1 | 4743 | HEXB | 8043 | PAMR1 | 11343 | TEKT4 |
| 1444 | CAV2 | 4744 | HEXD | 8044 | PANDAR | 11344 | TEKT5 |
| 1445 | CAV3 | 4745 | HEXIM1 | 8045 | PANK1 | 11345 | TEN1 |
| 1446 | CAVIN1 | 4746 | HEXIM2 | 8046 | PANK2 | 11346 | TEN1-CDK3 |
| 1447 | CAVIN2 | 4747 | HEY1 | 8047 | PANK2-AS1 | 11347 | TENM2 |
| 1448 | CAVIN3 | 4748 | HEY2 | 8048 | PANK4 | 11348 | TENM3 |
| 1449 | CAVIN4 | 4749 | HEYL | 8049 | PANX1 | 11349 | TENM4 |
| 1450 | CBFA2T2 | 4750 | HFE | 8050 | PANX2 | 11350 | TENT2 |
| 1451 | CBFA2T3 | 4751 | HGD | 8051 | PAOX | 11351 | TENT4A |
| 1452 | CBFB | 4752 | HGF | 8052 | PAPOLA | 11352 | TENT4B |
| 1453 | CBL | 4753 | HGFAC | 8053 | PAPOLG | 11353 | TENT5C |
| 1454 | CBLB | 4754 | HGS | 8054 | PAPPA | 11354 | TERC |
| 1455 | CBLC | 4755 | HGSNAT | 8055 | PAPPA2 | 11355 | TERF1 |
| 1456 | CBLIF | 4756 | HHAT | 8056 | PAPSS1 | 11356 | TERF2 |
| 1457 | CBLL1 | 4757 | HHEX | 8057 | PAPSS2 | 11357 | TERF2IP |
| 1458 | CBLN3 | 4758 | HHIP | 8058 | PAQR3 | 11358 | TERT |
| 1459 | CBR1 | 4759 | HIBADH | 8059 | PARD3 | 11359 | TES |
| 1460 | CBR3 | 4760 | HIBCH | 8060 | PARD3B | 11360 | TESK2 |
| 1461 | CBR3-AS1 | 4761 | HIC1 | 8061 | PARG | 11361 | TESMIN |
| 1462 | CBS | 4762 | HIC2 | 8062 | PARK7 | 11362 | TET1 |
| 1463 | CBSL | 4763 | HID1 | 8063 | PARL | 11363 | TET2 |
| 1464 | CBX1 | 4764 | HIF1A | 8064 | PARN | 11364 | TEX10 |
| 1465 | CBX2 | 4765 | HIF1A-AS1 | 8065 | PARP1 | 11365 | TEX14 |
| 1466 | CBX3 | 4766 | HIF1A-AS2 | 8066 | PARP10 | 11366 | TEX15 |
| 1467 | CBX4 | 4767 | HIF1AN | 8067 | PARP11 | 11367 | TEX2 |
| 1468 | CBX5 | 4768 | HIF3A | 8068 | PARP12 | 11368 | TEX264 |
| 1469 | CBX7 | 4769 | HIGD1A | 8069 | PARP14 | 11369 | TEX35 |
| 1470 | CBX8 | 4770 | HIKESHI | 8070 | PARP15 | 11370 | TEX38 |
| 1471 | CBY1 | 4771 | HILPDA | 8071 | PARP16 | 11371 | TF |
| 1472 | CC2D1A | 4772 | HINFP | 8072 | PARP2 | 11372 | TFAM |
| 1473 | CC2D2A | 4773 | HINT1 | 8073 | PARP3 | 11373 | TFAP2A |
| 1474 | CCAR1 | 4774 | HINT2 | 8074 | PARP4 | 11374 | TFAP2B |
| 1475 | CCAR2 | 4775 | HIP1 | 8075 | PARP8 | 11375 | TFAP2C |
| 1476 | CCAT1 | 4776 | HIP1R | 8076 | PARP9 | 11376 | TFAP4 |
| 1477 | CCAT2 | 4777 | HIPK1 | 8077 | PARPBP | 11377 | TFB1M |
| 1478 | CCBE1 | 4778 | HIPK2 | 8078 | PARS2 | 11378 | TFB2M |
| 1479 | CCDC102A | 4779 | HIPK3 | 8079 | PARVA | 11379 | TFCP2 |
| 1480 | CCDC102B | 4780 | HIRA | 8080 | PARVB | 11380 | TFCP2L1 |
| 1481 | CCDC103 | 4781 | HIRIP3 | 8081 | PATE1 | 11381 | TFDP1 |
| 1482 | CCDC114 | 4782 | HIVEP1 | 8082 | PATJ | 11382 | TFDP2 |
| 1483 | CCDC115 | 4783 | HIVEP2 | 8083 | PATL1 | 11383 | TFDP3 |
| 1484 | CCDC117 | 4784 | HIVEP3 | 8084 | PATZ1 | 11384 | TFE3 |
| 1485 | CCDC12 | 4785 | HJURP | 8085 | PAUPAR | 11385 | TFEB |
| 1486 | CCDC120 | 4786 | HJV | 8086 | PAWR | 11386 | TFF1 |
| 1487 | CCDC122 | 4787 | HK1 | 8087 | PAX1 | 11387 | TFF2 |
| 1488 | CCDC124 | 4788 | HK2 | 8088 | PAX2 | 11388 | TFF3 |
| 1489 | CCDC127 | 4789 | HK3 | 8089 | PAX3 | 11389 | TFG |
| 1490 | CCDC13 | 4790 | HKDC1 | 8090 | PAX4 | 11390 | TFIP11 |
| 1491 | CCDC134 | 4791 | HLA-A | 8091 | PAX5 | 11391 | TFPI |
| 1492 | CCDC136 | 4792 | HLA-B | 8092 | PAX6 | 11392 | TFPI2 |
| 1493 | CCDC14 | 4793 | HLA-C | 8093 | PAX7 | 11393 | TFPT |
| 1494 | CCDC146 | 4794 | HLA-DMA | 8094 | PAX8 | 11394 | TFR2 |
| 1495 | CCDC151 | 4795 | HLA-DMB | 8095 | PAX9 | 11395 | TFRC |
| 1496 | CCDC152 | 4796 | HLA-DOA | 8096 | PAXBP1 | 11396 | TG |
| 1497 | CCDC158 | 4797 | HLA-DOB | 8097 | PAXIP1 | 11397 | TGFA |
| 1498 | CCDC170 | 4798 | HLA-DPA1 | 8098 | PAXX | 11398 | TGFB1 |
| 1499 | CCDC174 | 4799 | HLA-DPB1 | 8099 | PBC2 | 11399 | TGFB1I1 |
| 1500 | CCDC22 | 4800 | HLA-DQA1 | 8100 | PBC3 | 11400 | TGFB2 |
| 1501 | CCDC25 | 4801 | HLA-DQA2 | 8101 | PBC4 | 11401 | TGFB3 |
| 1502 | CCDC38 | 4802 | HLA-DQB1 | 8102 | PBC5 | 11402 | TGFBI |
| 1503 | CCDC39 | 4803 | HLA-DQB1-AS1 | 8103 | PBDC1 | 11403 | TGFBR1 |
| 1504 | CCDC40 | 4804 | HLA-DQB2 | 8104 | PBK | 11404 | TGFBR2 |
| 1505 | CCDC47 | 4805 | HLA-DRA | 8105 | PBOV1 | 11405 | TGFBR3 |
| 1506 | CCDC50 | 4806 | HLA-DRB1 | 8106 | PBRM1 | 11406 | TGFBRAP1 |
| 1507 | CCDC51 | 4807 | HLA-DRB3 | 8107 | PBX1 | 11407 | TGIF1 |
| 1508 | CCDC6 | 4808 | HLA-DRB4 | 8108 | PBX2 | 11408 | TGIF2 |
| 1509 | CCDC61 | 4809 | HLA-DRB5 | 8109 | PBX3 | 11409 | TGM1 |
| 1510 | CCDC62 | 4810 | HLA-DRB6 | 8110 | PBX4 | 11410 | TGM2 |
| 1511 | CCDC63 | 4811 | HLA-E | 8111 | PBXIP1 | 11411 | TGM3 |
| 1512 | CCDC65 | 4812 | HLA-F | 8112 | PC | 11412 | TGM4 |
| 1513 | CCDC7 | 4813 | HLA-G | 8113 | PCA3 | 11413 | TGM5 |
| 1514 | CCDC8 | 4814 | HLA-H | 8114 | PCAP | 11414 | TGM6 |
| 1515 | CCDC80 | 4815 | HLA-K | 8115 | PCARE | 11415 | TGOLN2 |
| 1516 | CCDC82 | 4816 | HLA-S | 8116 | PCAT1 | 11416 | TGS1 |
| 1517 | CCDC85A | 4817 | HLA-T | 8117 | PCAT14 | 11417 | TH |
| 1518 | CCDC85B | 4818 | HLA-W | 8118 | PCAT18 | 11418 | THADA |
| 1519 | CCDC85C | 4819 | HLA-X | 8119 | PCAT19 | 11419 | THAP1 |
| 1520 | CCDC86 | 4820 | HLCS | 8120 | PCAT2 | 11420 | THAP11 |
| 1521 | CCDC88A | 4821 | HLTF | 8121 | PCAT29 | 11421 | THAP3 |
| 1522 | CCDC88B | 4822 | HM13 | 8122 | PCAT4 | 11422 | THAP4 |
| 1523 | CCDC88C | 4823 | HMBOX1 | 8123 | PCAT5 | 11423 | THAP5 |
| 1524 | CCDC89 | 4824 | HMBS | 8124 | PCAT6 | 11424 | THAP7 |
| 1525 | CCDC9 | 4825 | HMCES | 8125 | PCAT7 | 11425 | THBD |
| 1526 | CCDC91 | 4826 | HMCN1 | 8126 | PCBD1 | 11426 | THBS1 |
| 1527 | CCDC92 | 4827 | HMCN2 | 8127 | PCBP1 | 11427 | THBS2 |
| 1528 | CCDC93 | 4828 | HMG20A | 8128 | PCBP2 | 11428 | THBS3 |
| 1529 | CCDC97 | 4829 | HMGA1 | 8129 | PCBP3 | 11429 | THBS4 |
| 1530 | CCDC9B | 4830 | HMGA2 | 8130 | PCBP4 | 11430 | THEM6 |
| 1531 | CCHCR1 | 4831 | HMGB1 | 8131 | PCCA | 11431 | THNSL1 |
| 1532 | CCK | 4832 | HMGB2 | 8132 | PCCB | 11432 | THOC1 |
| 1533 | CCKAR | 4833 | HMGB3 | 8133 | PCDH10 | 11433 | THOC2 |
| 1534 | CCKBR | 4834 | HMGCL | 8134 | PCDH11X | 11434 | THOC3 |
| 1535 | CCL1 | 4835 | HMGCR | 8135 | PCDH12 | 11435 | THOC5 |
| 1536 | CCL11 | 4836 | HMGCS1 | 8136 | PCDH15 | 11436 | THOC6 |
| 1537 | CCL13 | 4837 | HMGCS2 | 8137 | PCDH17 | 11437 | THOC7 |
| 1538 | CCL14 | 4838 | HMGN1 | 8138 | PCDH19 | 11438 | THOP1 |
| 1539 | CCL16 | 4839 | HMGN2 | 8139 | PCDH7 | 11439 | THPO |
| 1540 | CCL17 | 4840 | HMGN2P46 | 8140 | PCDH8 | 11440 | THRA |
| 1541 | CCL18 | 4841 | HMGN3 | 8141 | PCDH9 | 11441 | THRAP3 |
| 1542 | CCL19 | 4842 | HMGN4 | 8142 | PCF11 | 11442 | THRB |
| 1543 | CCL2 | 4843 | HMGN5 | 8143 | PCGEM1 | 11443 | THRIL |
| 1544 | CCL20 | 4844 | HMGXB4 | 8144 | PCGF2 | 11444 | THRSP |
| 1545 | CCL21 | 4845 | HMMR | 8145 | PCGF6 | 11445 | THSD4 |
| 1546 | CCL22 | 4846 | HMOX1 | 8146 | PCID2 | 11446 | THSD7A |
| 1547 | CCL24 | 4847 | HMOX2 | 8147 | PCK1 | 11447 | THTPA |
| 1548 | CCL25 | 4848 | HMX1 | 8148 | PCK2 | 11448 | THUMPD1 |
| 1549 | CCL26 | 4849 | HNF1A | 8149 | PCLAF | 11449 | THUMPD2 |
| 1550 | CCL27 | 4850 | HNF1A-AS1 | 8150 | PCLO | 11450 | THY1 |
| 1551 | CCL28 | 4851 | HNF1B | 8151 | PCM1 | 11451 | THYN1 |
| 1552 | CCL3 | 4852 | HNF4A | 8152 | PCMT1 | 11452 | TIA1 |
| 1553 | CCL3L1 | 4853 | HNF4A-AS1 | 8153 | PCMTD2 | 11453 | TIAL1 |
| 1554 | CCL3L3 | 4854 | HNMT | 8154 | PCNA | 11454 | TIAM1 |
| 1555 | CCL4 | 4855 | HNP1 | 8155 | PCNP | 11455 | TIAM2 |
| 1556 | CCL4L1 | 4856 | HNRNPA0 | 8156 | PCNT | 11456 | TICAM1 |
| 1557 | CCL4L2 | 4857 | HNRNPA1 | 8157 | PCNX3 | 11457 | TICRR |
| 1558 | CCL5 | 4858 | HNRNPA2B1 | 8158 | PCOLCE | 11458 | TIE1 |
| 1559 | CCL7 | 4859 | HNRNPA3 | 8159 | PCOTH | 11459 | TIFA |
| 1560 | CCL8 | 4860 | HNRNPAB | 8160 | PCSEAT | 11460 | TIGAR |
| 1561 | CCM2 | 4861 | HNRNPC | 8161 | PCSK1 | 11461 | TIGIT |
| 1562 | CCN1 | 4862 | HNRNPCL1 | 8162 | PCSK1N | 11462 | TIMD4 |
| 1563 | CCN2 | 4863 | HNRNPD | 8163 | PCSK2 | 11463 | TIMELESS |
| 1564 | CCN3 | 4864 | HNRNPDL | 8164 | PCSK4 | 11464 | TIMM10 |
| 1565 | CCN4 | 4865 | HNRNPF | 8165 | PCSK5 | 11465 | TIMM10B |
| 1566 | CCN6 | 4866 | HNRNPH1 | 8166 | PCSK6 | 11466 | TIMM13 |
| 1567 | CCNA1 | 4867 | HNRNPH2 | 8167 | PCSK7 | 11467 | TIMM17A |
| 1568 | CCNA2 | 4868 | HNRNPH3 | 8168 | PCSK9 | 11468 | TIMM17B |
| 1569 | CCNB1 | 4869 | HNRNPK | 8169 | PCTP | 11469 | TIMM22 |
| 1570 | CCNB2 | 4870 | HNRNPL | 8170 | PCYT1A | 11470 | TIMM23 |
| 1571 | CCNC | 4871 | HNRNPLL | 8171 | PCYT1B | 11471 | TIMM23B |
| 1572 | CCND1 | 4872 | HNRNPM | 8172 | PDAP1 | 11472 | TIMM44 |
| 1573 | CCND2 | 4873 | HNRNPR | 8173 | PDCD1 | 11473 | TIMM50 |
| 1574 | CCND3 | 4874 | HNRNPU | 8174 | PDCD10 | 11474 | TIMM8A |
| 1575 | CCNDBP1 | 4875 | HNRNPUL1 | 8175 | PDCD1LG2 | 11475 | TIMM8B |
| 1576 | CCNE1 | 4876 | HNRNPUL2 | 8176 | PDCD2 | 11476 | TIMM9 |
| 1577 | CCNE2 | 4877 | HNRNPUL2-BSCL2 | 8177 | PDCD4 | 11477 | TIMMDC1 |
| 1578 | CCNF | 4878 | HOGA1 | 8178 | PDCD5 | 11478 | TIMP1 |
| 1579 | CCNG1 | 4879 | HOMER1 | 8179 | PDCD6 | 11479 | TIMP2 |
| 1580 | CCNG2 | 4880 | HOMER2 | 8180 | PDCD6IP | 11480 | TIMP3 |
| 1581 | CCNH | 4881 | HOMER3 | 8181 | PDCD7 | 11481 | TIMP4 |
| 1582 | CCNI | 4882 | HOMEZ | 8182 | PDCL | 11482 | TINAG |
| 1583 | CCNK | 4883 | HOOK1 | 8183 | PDE12 | 11483 | TINAGL1 |
| 1584 | CCNL1 | 4884 | HOOK3 | 8184 | PDE1A | 11484 | TINCR |
| 1585 | CCNL2 | 4885 | HOPX | 8185 | PDE1C | 11485 | TINF2 |
| 1586 | CCNO | 4886 | HORMAD1 | 8186 | PDE2A | 11486 | TIPARP |
| 1587 | CCNT1 | 4887 | HORMAD2 | 8187 | PDE3A | 11487 | TIPIN |
| 1588 | CCNT2 | 4888 | HOTAIR | 8188 | PDE3B | 11488 | TIPRL |
| 1589 | CCNY | 4889 | HOTAIRM1 | 8189 | PDE4A | 11489 | TIRAP |
| 1590 | CCNYL1 | 4890 | HOTTIP | 8190 | PDE4B | 11490 | TJAP1 |
| 1591 | CCP110 | 4891 | HOXA1 | 8191 | PDE4D | 11491 | TJP1 |
| 1592 | CCPG1 | 4892 | HOXA10 | 8192 | PDE4DIP | 11492 | TJP2 |
| 1593 | CCR1 | 4893 | HOXA11 | 8193 | PDE5A | 11493 | TJP3 |
| 1594 | CCR2 | 4894 | HOXA11-AS | 8194 | PDE6G | 11494 | TK1 |
| 1595 | CCR3 | 4895 | HOXA13 | 8195 | PDE7A | 11495 | TK2 |
| 1596 | CCR4 | 4896 | HOXA5 | 8196 | PDE7B | 11496 | TKT |
| 1597 | CCR5 | 4897 | HOXA7 | 8197 | PDE8A | 11497 | TKTL1 |
| 1598 | CCR6 | 4898 | HOXA9 | 8198 | PDE8B | 11498 | TLDC2 |
| 1599 | CCR7 | 4899 | HOXA-AS2 | 8199 | PDE9A | 11499 | TLE1 |
| 1600 | CCR8 | 4900 | HOXB13 | 8200 | PDF | 11500 | TLE2 |
| 1601 | CCR9 | 4901 | HOXB2 | 8201 | PDGFA | 11501 | TLE3 |
| 1602 | CCRL2 | 4902 | HOXB4 | 8202 | PDGFB | 11502 | TLE4 |
| 1603 | CCS | 4903 | HOXB6 | 8203 | PDGFC | 11503 | TLE5 |
| 1604 | CCSER1 | 4904 | HOXB7 | 8204 | PDGFD | 11504 | TLK1 |
| 1605 | CCT2 | 4905 | HOXB9 | 8205 | PDGFRA | 11505 | TLK2 |
| 1606 | CCT3 | 4906 | HOXC10 | 8206 | PDGFRB | 11506 | TLL1 |
| 1607 | CCT4 | 4907 | HOXC13 | 8207 | PDGFRL | 11507 | TLL2 |
| 1608 | CCT5 | 4908 | HOXC6 | 8208 | PDHA1 | 11508 | TLN1 |
| 1609 | CCT6A | 4909 | HOXC8 | 8209 | PDHB | 11509 | TLN2 |
| 1610 | CCT6B | 4910 | HOXD10 | 8210 | PDHX | 11510 | TLR1 |
| 1611 | CCT7 | 4911 | HOXD13 | 8211 | PDIA2 | 11511 | TLR10 |
| 1612 | CCT8 | 4912 | HP | 8212 | PDIA3 | 11512 | TLR2 |
| 1613 | CD101 | 4913 | HP1BP3 | 8213 | PDIA3P1 | 11513 | TLR3 |
| 1614 | CD14 | 4914 | HPC10 | 8214 | PDIA4 | 11514 | TLR4 |
| 1615 | CD151 | 4915 | HPC14 | 8215 | PDIA5 | 11515 | TLR5 |
| 1616 | CD160 | 4916 | HPC15 | 8216 | PDIA6 | 11516 | TLR6 |
| 1617 | CD163 | 4917 | HPC3 | 8217 | PDK1 | 11517 | TLR7 |
| 1618 | CD163L1 | 4918 | HPC4 | 8218 | PDK2 | 11518 | TLR8 |
| 1619 | CD164 | 4919 | HPC5 | 8219 | PDK3 | 11519 | TLR9 |
| 1620 | CD177 | 4920 | HPC6 | 8220 | PDK4 | 11520 | TLX3 |
| 1621 | CD180 | 4921 | HPC7 | 8221 | PDLIM1 | 11521 | TM2D1 |
| 1622 | CD19 | 4922 | HPD | 8222 | PDLIM2 | 11522 | TM2D3 |
| 1623 | CD1A | 4923 | HPF1 | 8223 | PDLIM3 | 11523 | TM4SF20 |
| 1624 | CD1B | 4924 | HPGD | 8224 | PDLIM5 | 11524 | TM6SF2 |
| 1625 | CD1C | 4925 | HPGDS | 8225 | PDLIM7 | 11525 | TM7SF2 |
| 1626 | CD1D | 4926 | HPN | 8226 | PDP1 | 11526 | TM9SF2 |
| 1627 | CD1E | 4927 | HPR | 8227 | PDPK1 | 11527 | TM9SF3 |
| 1628 | CD2 | 4928 | HPRT1 | 8228 | PDPN | 11528 | TM9SF4 |
| 1629 | CD200 | 4929 | HPS1 | 8229 | PDRG1 | 11529 | TMBIM4 |
| 1630 | CD200R1 | 4930 | HPS3 | 8230 | PDS5A | 11530 | TMBIM6 |
| 1631 | CD207 | 4931 | HPS4 | 8231 | PDS5B | 11531 | TMC2 |
| 1632 | CD209 | 4932 | HPS5 | 8232 | PDSS1 | 11532 | TMC4 |
| 1633 | CD22 | 4933 | HPS6 | 8233 | PDSS2 | 11533 | TMC6 |
| 1634 | CD226 | 4934 | HPSE | 8234 | PDX1 | 11534 | TMC8 |
| 1635 | CD24 | 4935 | HPSE2 | 8235 | PDXDC1 | 11535 | TMCO1 |
| 1636 | CD244 | 4936 | HPX | 8236 | PDXK | 11536 | TMCO3 |
| 1637 | CD247 | 4937 | HR | 8237 | PDXP | 11537 | TMCO4 |
| 1638 | CD248 | 4938 | HRAS | 8238 | PDYN | 11538 | TMCO6 |
| 1639 | CD27 | 4939 | HRC | 8239 | PDZD11 | 11539 | TMED1 |
| 1640 | CD274 | 4940 | HRG | 8240 | PDZD2 | 11540 | TMED10 |
| 1641 | CD276 | 4941 | HRH1 | 8241 | PDZD3 | 11541 | TMED3 |
| 1642 | CD28 | 4942 | HRH2 | 8242 | PDZD7 | 11542 | TMED7 |
| 1643 | CD2AP | 4943 | HRH3 | 8243 | PDZD8 | 11543 | TMED9 |
| 1644 | CD2BP2 | 4944 | HRH4 | 8244 | PDZD9 | 11544 | TMEFF2 |
| 1645 | CD2-LCR | 4945 | HRK | 8245 | PDZK1 | 11545 | TMEM106B |
| 1646 | CD300C | 4946 | HRNR | 8246 | PDZK1IP1 | 11546 | TMEM114 |
| 1647 | CD300LB | 4947 | HS1BP3 | 8247 | PDZRN3 | 11547 | TMEM119 |
| 1648 | CD300LF | 4948 | HS2ST1 | 8248 | PDZRN3-AS1 | 11548 | TMEM120A |
| 1649 | CD320 | 4949 | HS6ST2 | 8249 | PEA15 | 11549 | TMEM123 |
| 1650 | CD33 | 4950 | HSBP1 | 8250 | PEAK1 | 11550 | TMEM126B |
| 1651 | CD34 | 4951 | HSCB | 8251 | PEBP1 | 11551 | TMEM127 |
| 1652 | CD36 | 4952 | HSD11B1 | 8252 | PECAM1 | 11552 | TMEM131 |
| 1653 | CD38 | 4953 | HSD11B2 | 8253 | PECR | 11553 | TMEM132A |
| 1654 | CD3D | 4954 | HSD17B1 | 8254 | PEDS1 | 11554 | TMEM138 |
| 1655 | CD3E | 4955 | HSD17B10 | 8255 | PEDS1-UBE2V1 | 11555 | TMEM139 |
| 1656 | CD3G | 4956 | HSD17B11 | 8256 | PEE1 | 11556 | TMEM147 |
| 1657 | CD4 | 4957 | HSD17B12 | 8257 | PEE2 | 11557 | TMEM14A |
| 1658 | CD40 | 4958 | HSD17B13 | 8258 | PEE3 | 11558 | TMEM150B |
| 1659 | CD40LG | 4959 | HSD17B14 | 8259 | PEF1 | 11559 | TMEM150C |
| 1660 | CD44 | 4960 | HSD17B4 | 8260 | PEG10 | 11560 | TMEM161A |
| 1661 | CD46 | 4961 | HSD17B6 | 8261 | PEG3 | 11561 | TMEM165 |
| 1662 | CD47 | 4962 | HSD17B8 | 8262 | PELATON | 11562 | TMEM167A |
| 1663 | CD48 | 4963 | HSD3B1 | 8263 | PELI1 | 11563 | TMEM176A |
| 1664 | CD5 | 4964 | HSD3B2 | 8264 | PELI2 | 11564 | TMEM181 |
| 1665 | CD52 | 4965 | HSD3B7 | 8265 | PELI3 | 11565 | TMEM182 |
| 1666 | CD53 | 4966 | HSD3BP4 | 8266 | PELO | 11566 | TMEM192 |
| 1667 | CD55 | 4967 | HSDL2 | 8267 | PELP1 | 11567 | TMEM199 |
| 1668 | CD58 | 4968 | HSF1 | 8268 | PEMT | 11568 | TMEM201 |
| 1669 | CD59 | 4969 | HSF2 | 8269 | PENK | 11569 | TMEM203 |
| 1670 | CD5L | 4970 | HSF2BP | 8270 | PEPD | 11570 | TMEM205 |
| 1671 | CD6 | 4971 | HSH2D | 8271 | PER1 | 11571 | TMEM209 |
| 1672 | CD63 | 4972 | HSP90AA1 | 8272 | PER2 | 11572 | TMEM214 |
| 1673 | CD68 | 4973 | HSP90AA2P | 8273 | PER3 | 11573 | TMEM216 |
| 1674 | CD69 | 4974 | HSP90AB1 | 8274 | PERP | 11574 | TMEM223 |
| 1675 | CD7 | 4975 | HSP90AB3P | 8275 | PES1 | 11575 | TMEM230 |
| 1676 | CD70 | 4976 | HSP90B1 | 8276 | PET100 | 11576 | TMEM231 |
| 1677 | CD72 | 4977 | HSPA12A | 8277 | PET117 | 11577 | TMEM237 |
| 1678 | CD74 | 4978 | HSPA12B | 8278 | PEX1 | 11578 | TMEM238 |
| 1679 | CD79A | 4979 | HSPA13 | 8279 | PEX10 | 11579 | TMEM240 |
| 1680 | CD79B | 4980 | HSPA14 | 8280 | PEX11A | 11580 | TMEM241 |
| 1681 | CD80 | 4981 | HSPA1A | 8281 | PEX11B | 11581 | TMEM245 |
| 1682 | CD81 | 4982 | HSPA1B | 8282 | PEX11G | 11582 | TMEM248 |
| 1683 | CD82 | 4983 | HSPA1L | 8283 | PEX12 | 11583 | TMEM30A |
| 1684 | CD83 | 4984 | HSPA2 | 8284 | PEX13 | 11584 | TMEM30B |
| 1685 | CD84 | 4985 | HSPA4 | 8285 | PEX14 | 11585 | TMEM30CP |
| 1686 | CD86 | 4986 | HSPA4L | 8286 | PEX16 | 11586 | TMEM33 |
| 1687 | CD8A | 4987 | HSPA5 | 8287 | PEX19 | 11587 | TMEM37 |
| 1688 | CD8B | 4988 | HSPA6 | 8288 | PEX2 | 11588 | TMEM38B |
| 1689 | CD9 | 4989 | HSPA7 | 8289 | PEX26 | 11589 | TMEM39A |
| 1690 | CD93 | 4990 | HSPA8 | 8290 | PEX3 | 11590 | TMEM39B |
| 1691 | CD99 | 4991 | HSPA9 | 8291 | PEX5 | 11591 | TMEM43 |
| 1692 | CDA | 4992 | HSPB1 | 8292 | PEX5L | 11592 | TMEM45A |
| 1693 | CDAN1 | 4993 | HSPB11 | 8293 | PEX6 | 11593 | TMEM50A |
| 1694 | CDAN3 | 4994 | HSPB2 | 8294 | PEX7 | 11594 | TMEM52 |
| 1695 | CDB2 | 4995 | HSPB3 | 8295 | PF4 | 11595 | TMEM54 |
| 1696 | CDC123 | 4996 | HSPB6 | 8296 | PF4V1 | 11596 | TMEM59 |
| 1697 | CDC14A | 4997 | HSPB8 | 8297 | PFAS | 11597 | TMEM63A |
| 1698 | CDC14B | 4998 | HSPBP1 | 8298 | PFDN1 | 11598 | TMEM63C |
| 1699 | CDC16 | 4999 | HSPD1 | 8299 | PFDN2 | 11599 | TMEM65 |
| 1700 | CDC20 | 5000 | HSPE1 | 8300 | PFDN4 | 11600 | TMEM67 |
| 1701 | CDC23 | 5001 | HSPG2 | 8301 | PFDN5 | 11601 | TMEM70 |
| 1702 | CDC25A | 5002 | HSPH1 | 8302 | PFDN6 | 11602 | TMEM87A |
| 1703 | CDC25B | 5003 | HTATIP2 | 8303 | PFKFB2 | 11603 | TMEM87B |
| 1704 | CDC25C | 5004 | HTATSF1 | 8304 | PFKFB3 | 11604 | TMEM9 |
| 1705 | CDC26 | 5005 | HTN1 | 8305 | PFKL | 11605 | TMEM97 |
| 1706 | CDC27 | 5006 | HTR1A | 8306 | PFKM | 11606 | TMF1 |
| 1707 | CDC34 | 5007 | HTR1B | 8307 | PFKP | 11607 | TMIE |
| 1708 | CDC37 | 5008 | HTR1D | 8308 | PFN1 | 11608 | TMIGD3 |
| 1709 | CDC40 | 5009 | HTR1F | 8309 | PFN2 | 11609 | TMLHE |
| 1710 | CDC42 | 5010 | HTR2A | 8310 | PGA3 | 11610 | TMOD1 |
| 1711 | CDC42BPB | 5011 | HTR2B | 8311 | PGA4 | 11611 | TMOD2 |
| 1712 | CDC42EP1 | 5012 | HTR2C | 8312 | PGA5 | 11612 | TMOD3 |
| 1713 | CDC42EP2 | 5013 | HTR3A | 8313 | PGAM1 | 11613 | TMPO |
| 1714 | CDC42EP3 | 5014 | HTR3C | 8314 | PGAM2 | 11614 | TMPRSS11A |
| 1715 | CDC42EP4 | 5015 | HTR3D | 8315 | PGAM5 | 11615 | TMPRSS11D |
| 1716 | CDC42SE2 | 5016 | HTR3E | 8316 | PGAP2 | 11616 | TMPRSS13 |
| 1717 | CDC45 | 5017 | HTR4 | 8317 | PGAP3 | 11617 | TMPRSS15 |
| 1718 | CDC5L | 5018 | HTR6 | 8318 | PGAP6 | 11618 | TMPRSS2 |
| 1719 | CDC6 | 5019 | HTR7 | 8319 | PGBD3 | 11619 | TMPRSS3 |
| 1720 | CDC7 | 5020 | HTRA1 | 8320 | PGC | 11620 | TMPRSS4 |
| 1721 | CDC73 | 5021 | HTRA2 | 8321 | PGD | 11621 | TMPRSS5 |
| 1722 | CDCA3 | 5022 | HTRA4 | 8322 | PGF | 11622 | TMPRSS6 |
| 1723 | CDCA4 | 5023 | HTT | 8323 | PGGHG | 11623 | TMSB10 |
| 1724 | CDCA5 | 5024 | HULC | 8324 | PGGT1B | 11624 | TMSB15A |
| 1725 | CDCA7 | 5025 | HUNK | 8325 | PGK1 | 11625 | TMSB4X |
| 1726 | CDCA7L | 5026 | HUS1 | 8326 | PGK2 | 11626 | TMTC1 |
| 1727 | CDCA8 | 5027 | HUS1B | 8327 | PGM1 | 11627 | TMTC2 |
| 1728 | CDCP1 | 5028 | HUWE1 | 8328 | PGM2 | 11628 | TMUB1 |
| 1729 | CDH1 | 5029 | HVCN1 | 8329 | PGM2L1 | 11629 | TMUB2 |
| 1730 | CDH10 | 5030 | HYAL1 | 8330 | PGM3 | 11630 | TMX1 |
| 1731 | CDH11 | 5031 | HYAL2 | 8331 | PGM5 | 11631 | TMX2 |
| 1732 | CDH12 | 5032 | HYAL3 | 8332 | PGP | 11632 | TMX3 |
| 1733 | CDH13 | 5033 | HYAL4 | 8333 | PGPEP1 | 11633 | TMX4 |
| 1734 | CDH15 | 5034 | HYDIN | 8334 | PGR | 11634 | TNC |
| 1735 | CDH16 | 5035 | HYI | 8335 | PGRMC1 | 11635 | TNF |
| 1736 | CDH17 | 5036 | HYLS1 | 8336 | PGRMC2 | 11636 | TNFAIP1 |
| 1737 | CDH18 | 5037 | HYMAI | 8337 | PHACTR1 | 11637 | TNFAIP2 |
| 1738 | CDH19 | 5038 | HYOU1 | 8338 | PHACTR3 | 11638 | TNFAIP3 |
| 1739 | CDH2 | 5039 | HYPK | 8339 | PHACTR4 | 11639 | TNFAIP6 |
| 1740 | CDH20 | 5040 | IAH1 | 8340 | PHAX | 11640 | TNFAIP8 |
| 1741 | CDH23 | 5041 | IAPP | 8341 | PHB | 11641 | TNFAIP8L1 |
| 1742 | CDH3 | 5042 | IARS1 | 8342 | PHB2 | 11642 | TNFAIP8L2 |
| 1743 | CDH4 | 5043 | IARS2 | 8343 | PHBP1 | 11643 | TNFRSF10A |
| 1744 | CDH5 | 5044 | IBA57 | 8344 | PHC1 | 11644 | TNFRSF10B |
| 1745 | CDH7 | 5045 | IBSP | 8345 | PHC2 | 11645 | TNFRSF10C |
| 1746 | CDH8 | 5046 | IBTK | 8346 | PHC3 | 11646 | TNFRSF10D |
| 1747 | CDH9 | 5047 | ICA1 | 8347 | PHETA1 | 11647 | TNFRSF11A |
| 1748 | CDHR1 | 5048 | ICAM1 | 8348 | PHEX | 11648 | TNFRSF11B |
| 1749 | CDIN1 | 5049 | ICAM2 | 8349 | PHF1 | 11649 | TNFRSF12A |
| 1750 | CDIP1 | 5050 | ICAM3 | 8350 | PHF10 | 11650 | TNFRSF13B |
| 1751 | CDIPT | 5051 | ICAM4 | 8351 | PHF11 | 11651 | TNFRSF13C |
| 1752 | CDK1 | 5052 | ICAM5 | 8352 | PHF12 | 11652 | TNFRSF14 |
| 1753 | CDK10 | 5053 | ICE1 | 8353 | PHF13 | 11653 | TNFRSF17 |
| 1754 | CDK11A | 5054 | ICE2 | 8354 | PHF14 | 11654 | TNFRSF18 |
| 1755 | CDK11B | 5055 | ICMT | 8355 | PHF2 | 11655 | TNFRSF19 |
| 1756 | CDK12 | 5056 | ICOS | 8356 | PHF20 | 11656 | TNFRSF1A |
| 1757 | CDK13 | 5057 | ICOSLG | 8357 | PHF20L1 | 11657 | TNFRSF1B |
| 1758 | CDK16 | 5058 | ID1 | 8358 | PHF21A | 11658 | TNFRSF21 |
| 1759 | CDK17 | 5059 | ID2 | 8359 | PHF23 | 11659 | TNFRSF25 |
| 1760 | CDK18 | 5060 | ID2-AS1 | 8360 | PHF3 | 11660 | TNFRSF4 |
| 1761 | CDK19 | 5061 | ID3 | 8361 | PHF5A | 11661 | TNFRSF6B |
| 1762 | CDK2 | 5062 | ID4 | 8362 | PHF6 | 11662 | TNFRSF8 |
| 1763 | CDK20 | 5063 | IDDM11 | 8363 | PHF8 | 11663 | TNFRSF9 |
| 1764 | CDK2AP1 | 5064 | IDDM13 | 8364 | PHGDH | 11664 | TNFSF10 |
| 1765 | CDK3 | 5065 | IDDM15 | 8365 | PHIP | 11665 | TNFSF11 |
| 1766 | CDK4 | 5066 | IDDM17 | 8366 | PHKA1 | 11666 | TNFSF12 |
| 1767 | CDK5 | 5067 | IDDM18 | 8367 | PHKA2 | 11667 | TNFSF13 |
| 1768 | CDK5R1 | 5068 | IDDM23 | 8368 | PHKB | 11668 | TNFSF13B |
| 1769 | CDK5R2 | 5069 | IDDM24 | 8369 | PHKG1 | 11669 | TNFSF14 |
| 1770 | CDK5RAP2 | 5070 | IDDM3 | 8370 | PHKG2 | 11670 | TNFSF15 |
| 1771 | CDK5RAP3 | 5071 | IDDM4 | 8371 | PHLDA1 | 11671 | TNFSF18 |
| 1772 | CDK6 | 5072 | IDDM6 | 8372 | PHLDA2 | 11672 | TNFSF4 |
| 1773 | CDK7 | 5073 | IDDM7 | 8373 | PHLDA3 | 11673 | TNFSF8 |
| 1774 | CDK8 | 5074 | IDDM8 | 8374 | PHLDB1 | 11674 | TNFSF9 |
| 1775 | CDK9 | 5075 | IDE | 8375 | PHLDB2 | 11675 | TNIK |
| 1776 | CDKAL1 | 5076 | IDH1 | 8376 | PHLPP1 | 11676 | TNIP1 |
| 1777 | CDKL1 | 5077 | IDH2 | 8377 | PHLPP2 | 11677 | TNIP2 |
| 1778 | CDKL2 | 5078 | IDH3A | 8378 | PHOSPHO1 | 11678 | TNIP3 |
| 1779 | CDKL5 | 5079 | IDH3B | 8379 | PHOX2B | 11679 | TNK1 |
| 1780 | CDKN1A | 5080 | IDH3G | 8380 | PHPT1 | 11680 | TNK2 |
| 1781 | CDKN1B | 5081 | IDI1 | 8381 | PHRF1 | 11681 | TNKS |
| 1782 | CDKN1C | 5082 | IDO1 | 8382 | PHYH | 11682 | TNKS1BP1 |
| 1783 | CDKN2A | 5083 | IDO2 | 8383 | PHYHD1 | 11683 | TNKS2 |
| 1784 | CDKN2AIP | 5084 | IDS | 8384 | PHYHIP | 11684 | TNMD |
| 1785 | CDKN2B | 5085 | IDUA | 8385 | PHYKPL | 11685 | TNNC1 |
| 1786 | CDKN2B-AS1 | 5086 | IER2 | 8386 | PI16 | 11686 | TNNC2 |
| 1787 | CDKN2C | 5087 | IER3 | 8387 | PI3 | 11687 | TNNI1 |
| 1788 | CDKN2D | 5088 | IER3IP1 | 8388 | PI4K2A | 11688 | TNNI2 |
| 1789 | CDKN3 | 5089 | IER5 | 8389 | PI4KA | 11689 | TNNI3 |
| 1790 | CDNF | 5090 | IFI16 | 8390 | PI4KB | 11690 | TNNT1 |
| 1791 | CDO1 | 5091 | IFI27 | 8391 | PIAS1 | 11691 | TNNT2 |
| 1792 | CDON | 5092 | IFI35 | 8392 | PIAS2 | 11692 | TNNT3 |
| 1793 | CDR1 | 5093 | IFI44L | 8393 | PIAS3 | 11693 | TNP1 |
| 1794 | CDR1-AS | 5094 | IFIH1 | 8394 | PIAS4 | 11694 | TNPO1 |
| 1795 | CDR2 | 5095 | IFIT1 | 8395 | PIBF1 | 11695 | TNPO3 |
| 1796 | CDRT1 | 5096 | IFIT2 | 8396 | PICALM | 11696 | TNR |
| 1797 | CDRT15 | 5097 | IFIT3 | 8397 | PICK1 | 11697 | TNRC18 |
| 1798 | CDRT4 | 5098 | IFITM1 | 8398 | PIDD1 | 11698 | TNRC6A |
| 1799 | CDS1 | 5099 | IFITM2 | 8399 | PIEZO1 | 11699 | TNRC6B |
| 1800 | CDS2 | 5100 | IFITM3 | 8400 | PIEZO2 | 11700 | TNRC6C |
| 1801 | CDSN | 5101 | IFITM5 | 8401 | PIF1 | 11701 | TNS1 |
| 1802 | CDT1 | 5102 | IFN1@ | 8402 | PIFO | 11702 | TNS2 |
| 1803 | CDV3 | 5103 | IFNA1 | 8403 | PIGA | 11703 | TNS3 |
| 1804 | CDX1 | 5104 | IFNA2 | 8404 | PIGF | 11704 | TNS4 |
| 1805 | CDX2 | 5105 | IFNA4 | 8405 | PIGG | 11705 | TNXA |
| 1806 | CDYL | 5106 | IFNAR1 | 8406 | PIGK | 11706 | TNXB |
| 1807 | CEACAM1 | 5107 | IFNAR2 | 8407 | PIGL | 11707 | TOB1 |
| 1808 | CEACAM16 | 5108 | IFNB1 | 8408 | PIGN | 11708 | TOE1 |
| 1809 | CEACAM3 | 5109 | IFNG | 8409 | PIGO | 11709 | TOLLIP |
| 1810 | CEACAM5 | 5110 | IFNG-AS1 | 8410 | PIGP | 11710 | TOM1 |
| 1811 | CEACAM6 | 5111 | IFNGR1 | 8411 | PIGQ | 11711 | TOM1L1 |
| 1812 | CEACAM7 | 5112 | IFNGR2 | 8412 | PIGR | 11712 | TOM1L2 |
| 1813 | CEACAM8 | 5113 | IFNL1 | 8413 | PIGS | 11713 | TOMM20 |
| 1814 | CEACAMP8 | 5114 | IFNL3 | 8414 | PIGT | 11714 | TOMM20L |
| 1815 | CEBPA | 5115 | IFNL4 | 8415 | PIGV | 11715 | TOMM22 |
| 1816 | CEBPB | 5116 | IFNLR1 | 8416 | PIGW | 11716 | TOMM34 |
| 1817 | CEBPD | 5117 | IFRD1 | 8417 | PIGY | 11717 | TOMM40 |
| 1818 | CEBPE | 5118 | IFRD2 | 8418 | PIH1D1 | 11718 | TOMM7 |
| 1819 | CEBPG | 5119 | IFT122 | 8419 | PIH1D2 | 11719 | TOMM70 |
| 1820 | CEBPZ | 5120 | IFT140 | 8420 | PIK3C2A | 11720 | TONSL |
| 1821 | CECR2 | 5121 | IFT172 | 8421 | PIK3C2B | 11721 | TOP1 |
| 1822 | CEL | 5122 | IFT20 | 8422 | PIK3C2G | 11722 | TOP1MT |
| 1823 | CELA1 | 5123 | IFT22 | 8423 | PIK3C3 | 11723 | TOP2A |
| 1824 | CELA2A | 5124 | IFT27 | 8424 | PIK3CA | 11724 | TOP2B |
| 1825 | CELA3B | 5125 | IFT43 | 8425 | PIK3CB | 11725 | TOP3A |
| 1826 | CELF1 | 5126 | IFT46 | 8426 | PIK3CD | 11726 | TOP3B |
| 1827 | CELF2 | 5127 | IFT52 | 8427 | PIK3CG | 11727 | TOPBP1 |
| 1828 | CELF3 | 5128 | IFT57 | 8428 | PIK3R1 | 11728 | TOPORS |
| 1829 | CELF4 | 5129 | IFT74 | 8429 | PIK3R2 | 11729 | TOR1A |
| 1830 | CELIAC10 | 5130 | IFT80 | 8430 | PIK3R3 | 11730 | TOR1AIP1 |
| 1831 | CELIAC11 | 5131 | IFT81 | 8431 | PIK3R4 | 11731 | TOR1AIP2 |
| 1832 | CELIAC12 | 5132 | IFT88 | 8432 | PIK3R5 | 11732 | TOR1B |
| 1833 | CELIAC13 | 5133 | IFTAP | 8433 | PIKFYVE | 11733 | TOR2A |
| 1834 | CELIAC2 | 5134 | IGBP1 | 8434 | PILRB | 11734 | TOR3A |
| 1835 | CELIAC5 | 5135 | IGDCC3 | 8435 | PIM1 | 11735 | TOX3 |
| 1836 | CELIAC6 | 5136 | IGES | 8436 | PIM2 | 11736 | TOX4 |
| 1837 | CELIAC7 | 5137 | IGF1 | 8437 | PIM3 | 11737 | TP53 |
| 1838 | CELIAC8 | 5138 | IGF1R | 8438 | PIN1 | 11738 | TP53AIP1 |
| 1839 | CELIAC9 | 5139 | IGF2 | 8439 | PIN4 | 11739 | TP53BP1 |
| 1840 | CELSR1 | 5140 | IGF2-AS | 8440 | PINK1 | 11740 | TP53BP2 |
| 1841 | CELSR2 | 5141 | IGF2BP1 | 8441 | PINK1-AS | 11741 | TP53COR1 |
| 1842 | CELSR3 | 5142 | IGF2BP2 | 8442 | PINX1 | 11742 | TP53I11 |
| 1843 | CEMIP2 | 5143 | IGF2BP3 | 8443 | PIP | 11743 | TP53I3 |
| 1844 | CENATAC | 5144 | IGF2R | 8444 | PIP4K2A | 11744 | TP53INP1 |
| 1845 | CEND1 | 5145 | IGFALS | 8445 | PIP4K2B | 11745 | TP53INP2 |
| 1846 | CENPA | 5146 | IGFBP1 | 8446 | PIP4K2C | 11746 | TP53RK |
| 1847 | CENPB | 5147 | IGFBP2 | 8447 | PIP5K1A | 11747 | TP53TG1 |
| 1848 | CENPBD1 | 5148 | IGFBP3 | 8448 | PIP5K1B | 11748 | TP63 |
| 1849 | CENPC | 5149 | IGFBP4 | 8449 | PIP5K1C | 11749 | TP73 |
| 1850 | CENPE | 5150 | IGFBP5 | 8450 | PIPOX | 11750 | TP73-AS1 |
| 1851 | CENPF | 5151 | IGFBP6 | 8451 | PIR | 11751 | TPBG |
| 1852 | CENPH | 5152 | IGFBP7 | 8452 | piR-33103-027 | 11752 | TPCN2 |
| 1853 | CENPI | 5153 | IGFL1 | 8453 | piR-45035-119 | 11753 | TPD52 |
| 1854 | CENPJ | 5154 | IGFL3 | 8454 | piR-56480-034 | 11754 | TPD52L1 |
| 1855 | CENPK | 5155 | IGH | 8455 | PISD | 11755 | TPD52L2 |
| 1856 | CENPM | 5156 | IGHA1 | 8456 | PITPNA | 11756 | TPH1 |
| 1857 | CENPS | 5157 | IGHE | 8457 | PITPNC1 | 11757 | TPH2 |
| 1858 | CENPT | 5158 | IGHG1 | 8458 | PITPNM1 | 11758 | TPI1 |
| 1859 | CENPU | 5159 | IGHG3 | 8459 | PITPNM2 | 11759 | TPI1P1 |
| 1860 | CENPV | 5160 | IGHG4 | 8460 | PITPNM3 | 11760 | TPK1 |
| 1861 | CENPW | 5161 | IGHM | 8461 | PITRM1 | 11761 | TPM1 |
| 1862 | CENPX | 5162 | IGHMBP2 | 8462 | PITX1 | 11762 | TPM2 |
| 1863 | CEP104 | 5163 | IGHV3-23 | 8463 | PITX2 | 11763 | TPM3 |
| 1864 | CEP120 | 5164 | IGHV4-38-2 | 8464 | PITX3 | 11764 | TPM4 |
| 1865 | CEP126 | 5165 | IGK | 8465 | PIWIL1 | 11765 | TPMT |
| 1866 | CEP128 | 5166 | IGKC | 8466 | PIWIL2 | 11766 | TPO |
| 1867 | CEP131 | 5167 | IGKV1-5 | 8467 | PIWIL4 | 11767 | TPP1 |
| 1868 | CEP135 | 5168 | IGKV2D-29 | 8468 | PJA1 | 11768 | TPP2 |
| 1869 | CEP152 | 5169 | IGKV4-1 | 8469 | PJA2 | 11769 | TPPP |
| 1870 | CEP164 | 5170 | IGL | 8470 | PKD1 | 11770 | TPPP3 |
| 1871 | CEP170 | 5171 | IGLL1 | 8471 | PKD1L1 | 11771 | TPR |
| 1872 | CEP170B | 5172 | IGLL5 | 8472 | PKD1L2 | 11772 | TPRA1 |
| 1873 | CEP19 | 5173 | IGSF1 | 8473 | PKD1L3 | 11773 | TPRKB |
| 1874 | CEP192 | 5174 | IGSF3 | 8474 | PKD1P1 | 11774 | TPRN |
| 1875 | CEP250 | 5175 | IGSF8 | 8475 | PKD2 | 11775 | TPSAB1 |
| 1876 | CEP290 | 5176 | IGSF9B | 8476 | PKD2L1 | 11776 | TPST1 |
| 1877 | CEP295 | 5177 | IHH | 8477 | PKD2L2 | 11777 | TPT1 |
| 1878 | CEP350 | 5178 | IHO1 | 8478 | PKD3 | 11778 | TPTE |
| 1879 | CEP41 | 5179 | IK | 8479 | PKDREJ | 11779 | TPTE2 |
| 1880 | CEP43 | 5180 | IKBIP | 8480 | PKHD1 | 11780 | TPTEP2-CSNK1E |
| 1881 | CEP44 | 5181 | IKBKB | 8481 | PKHD1L1 | 11781 | TPX2 |
| 1882 | CEP55 | 5182 | IKBKE | 8482 | PKIA | 11782 | TRA |
| 1883 | CEP57 | 5183 | IKBKG | 8483 | PKIB | 11783 | TRA2A |
| 1884 | CEP63 | 5184 | IKZF1 | 8484 | PKLR | 11784 | TRA2B |
| 1885 | CEP70 | 5185 | IKZF2 | 8485 | PKM | 11785 | TRABD |
| 1886 | CEP72 | 5186 | IKZF3 | 8486 | PKMYT1 | 11786 | TRADD |
| 1887 | CEP76 | 5187 | IKZF4 | 8487 | PKN1 | 11787 | TRAF1 |
| 1888 | CEP78 | 5188 | IKZF5 | 8488 | PKN2 | 11788 | TRAF2 |
| 1889 | CEP83 | 5189 | IL10 | 8489 | PKN3 | 11789 | TRAF3 |
| 1890 | CEP85 | 5190 | IL10RA | 8490 | PKNOX1 | 11790 | TRAF3IP1 |
| 1891 | CEP85L | 5191 | IL10RB | 8491 | PKP1 | 11791 | TRAF3IP2 |
| 1892 | CEP89 | 5192 | IL11 | 8492 | PKP2 | 11792 | TRAF4 |
| 1893 | CEP97 | 5193 | IL11RA | 8493 | PKP3 | 11793 | TRAF5 |
| 1894 | CEPT1 | 5194 | IL12A | 8494 | PKP4 | 11794 | TRAF6 |
| 1895 | CER1 | 5195 | IL12A-AS1 | 8495 | PLA2G10 | 11795 | TRAF7 |
| 1896 | CERK | 5196 | IL12B | 8496 | PLA2G1B | 11796 | TRAFD1 |
| 1897 | CERKL | 5197 | IL12RB1 | 8497 | PLA2G2A | 11797 | TRAIP |
| 1898 | CERNA2 | 5198 | IL12RB2 | 8498 | PLA2G2D | 11798 | TRAK1 |
| 1899 | CERS1 | 5199 | IL13 | 8499 | PLA2G2F | 11799 | TRAK2 |
| 1900 | CERS2 | 5200 | IL13RA1 | 8500 | PLA2G3 | 11800 | TRAM1 |
| 1901 | CERS5 | 5201 | IL13RA2 | 8501 | PLA2G4A | 11801 | TRAM2 |
| 1902 | CERS6 | 5202 | IL15 | 8502 | PLA2G4C | 11802 | TRAP1 |
| 1903 | CERT1 | 5203 | IL15RA | 8503 | PLA2G5 | 11803 | TRAPPC10 |
| 1904 | CES1 | 5204 | IL16 | 8504 | PLA2G6 | 11804 | TRAPPC11 |
| 1905 | CES1P1 | 5205 | IL17A | 8505 | PLA2G7 | 11805 | TRAPPC12 |
| 1906 | CES2 | 5206 | IL17B | 8506 | PLA2R1 | 11806 | TRAPPC13 |
| 1907 | CETN1 | 5207 | IL17C | 8507 | PLAA | 11807 | TRAPPC2 |
| 1908 | CETN2 | 5208 | IL17D | 8508 | PLAAT3 | 11808 | TRAPPC2B |
| 1909 | CETN3 | 5209 | IL17F | 8509 | PLAAT4 | 11809 | TRAPPC2L |
| 1910 | CETP | 5210 | IL17RA | 8510 | PLAAT5 | 11810 | TRAPPC3 |
| 1911 | CFAP126 | 5211 | IL17RB | 8511 | PLAC1 | 11811 | TRAPPC5 |
| 1912 | CFAP161 | 5212 | IL17RC | 8512 | PLAC8 | 11812 | TRAPPC8 |
| 1913 | CFAP206 | 5213 | IL17RD | 8513 | PLAGL1 | 11813 | TRAPPC9 |
| 1914 | CFAP221 | 5214 | IL18 | 8514 | PLAT | 11814 | TRAT1 |
| 1915 | CFAP251 | 5215 | IL18BP | 8515 | PLAU | 11815 | TRB |
| 1916 | CFAP298 | 5216 | IL18R1 | 8516 | PLAUR | 11816 | TRD |
| 1917 | CFAP298-TCP10L | 5217 | IL18RAP | 8517 | PLBD2 | 11817 | TRDMT1 |
| 1918 | CFAP300 | 5218 | IL19 | 8518 | PLCB1 | 11818 | TRDN |
| 1919 | CFAP36 | 5219 | IL1A | 8519 | PLCB2 | 11819 | TREH |
| 1920 | CFAP410 | 5220 | IL1B | 8520 | PLCB3 | 11820 | TREM1 |
| 1921 | CFAP43 | 5221 | IL1F10 | 8521 | PLCB4 | 11821 | TREM2 |
| 1922 | CFAP44 | 5222 | IL1R1 | 8522 | PLCD1 | 11822 | TREML1 |
| 1923 | CFAP45 | 5223 | IL1R2 | 8523 | PLCD3 | 11823 | TREML2 |
| 1924 | CFAP47 | 5224 | IL1RAP | 8524 | PLCE1 | 11824 | TRERNA1 |
| 1925 | CFAP52 | 5225 | IL1RAPL1 | 8525 | PLCG1 | 11825 | TREX1 |
| 1926 | CFAP53 | 5226 | IL1RAPL2 | 8526 | PLCG2 | 11826 | TREX2 |
| 1927 | CFAP54 | 5227 | IL1RL1 | 8527 | PLCH2 | 11827 | TRG |
| 1928 | CFAP61 | 5228 | IL1RL2 | 8528 | PLCL2 | 11828 | TRH |
| 1929 | CFAP69 | 5229 | IL1RN | 8529 | PLCZ1 | 11829 | TRHR |
| 1930 | CFAP74 | 5230 | IL2 | 8530 | PLD1 | 11830 | TRIAP1 |
| 1931 | CFAP94 | 5231 | IL20 | 8531 | PLD2 | 11831 | TRIB1 |
| 1932 | CFAP97 | 5232 | IL20RB | 8532 | PLD3 | 11832 | TRIB2 |
| 1933 | CFB | 5233 | IL21 | 8533 | PLD4 | 11833 | TRIB3 |
| 1934 | CFC1 | 5234 | IL21R | 8534 | PLD6 | 11834 | TRIM16 |
| 1935 | CFD | 5235 | IL22 | 8535 | PLEC | 11835 | TRIM17 |
| 1936 | CFDP1 | 5236 | IL22RA1 | 8536 | PLEK | 11836 | TRIM2 |
| 1937 | CFH | 5237 | IL22RA2 | 8537 | PLEKHA1 | 11837 | TRIM21 |
| 1938 | CFHR1 | 5238 | IL23A | 8538 | PLEKHA5 | 11838 | TRIM22 |
| 1939 | CFHR2 | 5239 | IL23R | 8539 | PLEKHA7 | 11839 | TRIM23 |
| 1940 | CFHR3 | 5240 | IL24 | 8540 | PLEKHA8 | 11840 | TRIM24 |
| 1941 | CFHR4 | 5241 | IL25 | 8541 | PLEKHF1 | 11841 | TRIM25 |
| 1942 | CFHR5 | 5242 | IL26 | 8542 | PLEKHF2 | 11842 | TRIM26 |
| 1943 | CFI | 5243 | IL27 | 8543 | PLEKHG3 | 11843 | TRIM27 |
| 1944 | CFL1 | 5244 | IL27RA | 8544 | PLEKHG5 | 11844 | TRIM28 |
| 1945 | CFL2 | 5245 | IL2RA | 8545 | PLEKHM1 | 11845 | TRIM29 |
| 1946 | CFLAR | 5246 | IL2RB | 8546 | PLEKHM2 | 11846 | TRIM32 |
| 1947 | CFM1 | 5247 | IL2RG | 8547 | PLEKHO1 | 11847 | TRIM33 |
| 1948 | CFP | 5248 | IL3 | 8548 | PLG | 11848 | TRIM37 |
| 1949 | CFTR | 5249 | IL31 | 8549 | PLGLB1 | 11849 | TRIM38 |
| 1950 | CFTR-AS1 | 5250 | IL32 | 8550 | PLGRKT | 11850 | TRIM39 |
| 1951 | CGA | 5251 | IL33 | 8551 | PLIN1 | 11851 | TRIM41 |
| 1952 | CGAS | 5252 | IL34 | 8552 | PLIN2 | 11852 | TRIM44 |
| 1953 | CGB3 | 5253 | IL36B | 8553 | PLIN3 | 11853 | TRIM46 |
| 1954 | CGB5 | 5254 | IL36G | 8554 | PLIN5 | 11854 | TRIM47 |
| 1955 | CGB7 | 5255 | IL36RN | 8555 | PLK1 | 11855 | TRIM5 |
| 1956 | CGGBP1 | 5256 | IL37 | 8556 | PLK2 | 11856 | TRIM52 |
| 1957 | CGN | 5257 | IL3RA | 8557 | PLK3 | 11857 | TRIM55 |
| 1958 | CGREF1 | 5258 | IL4 | 8558 | PLK4 | 11858 | TRIM56 |
| 1959 | CH25H | 5259 | IL4I1 | 8559 | PLK5 | 11859 | TRIM58 |
| 1960 | CHAC1 | 5260 | IL4R | 8560 | PLN | 11860 | TRIM59 |
| 1961 | CHAF1A | 5261 | IL5 | 8561 | PLOD1 | 11861 | TRIM63 |
| 1962 | CHAF1B | 5262 | IL5RA | 8562 | PLOD2 | 11862 | TRIM65 |
| 1963 | CHAMP1 | 5263 | IL6 | 8563 | PLOD3 | 11863 | TRIM66 |
| 1964 | CHAT | 5264 | IL6R | 8564 | PLP1 | 11864 | TRIM68 |
| 1965 | CHCHD10 | 5265 | IL6ST | 8565 | PLP2 | 11865 | TRIM69 |
| 1966 | CHCHD2 | 5266 | IL7 | 8566 | PLPBP | 11866 | TRIM7 |
| 1967 | CHCHD3 | 5267 | IL7R | 8567 | PLPP1 | 11867 | TRIM71 |
| 1968 | CHCHD4 | 5268 | IL9 | 8568 | PLPP2 | 11868 | TRIM8 |
| 1969 | CHCHD6 | 5269 | IL9R | 8569 | PLPP3 | 11869 | TRIO |
| 1970 | CHD1 | 5270 | ILDR1 | 8570 | PLPP6 | 11870 | TRIOBP |
| 1971 | CHD1L | 5271 | ILDR2 | 8571 | PLPP7 | 11871 | TRIP10 |
| 1972 | CHD2 | 5272 | ILF2 | 8572 | PLPPR5 | 11872 | TRIP11 |
| 1973 | CHD3 | 5273 | ILF3 | 8573 | PLRG1 | 11873 | TRIP12 |
| 1974 | CHD4 | 5274 | ILK | 8574 | PLS1 | 11874 | TRIP13 |
| 1975 | CHD5 | 5275 | ILKAP | 8575 | PLS3 | 11875 | TRIP4 |
| 1976 | CHD6 | 5276 | ILRUN | 8576 | PLSCR1 | 11876 | TRIP6 |
| 1977 | CHD7 | 5277 | ILVBL | 8577 | PLSCR3 | 11877 | TRIR |
| 1978 | CHD8 | 5278 | IMMP2L | 8578 | PLSCR4 | 11878 | TRIT1 |
| 1979 | CHD9 | 5279 | IMMT | 8579 | PLTP | 11879 | TRMT1 |
| 1980 | CHDH | 5280 | IMMTP1 | 8580 | PLVAP | 11880 | TRMT10A |
| 1981 | CHEK1 | 5281 | IMP3 | 8581 | PLXDC2 | 11881 | TRMT10C |
| 1982 | CHEK2 | 5282 | IMPA1 | 8582 | PLXNA1 | 11882 | TRMT11 |
| 1983 | CHERP | 5283 | IMPA2 | 8583 | PLXNA2 | 11883 | TRMT112 |
| 1984 | CHGA | 5284 | IMPACT | 8584 | PLXNA3 | 11884 | TRMT13 |
| 1985 | CHGB | 5285 | IMPDH1 | 8585 | PLXNB1 | 11885 | TRMT1L |
| 1986 | CHI3L1 | 5286 | IMPDH2 | 8586 | PLXNB2 | 11886 | TRMT2A |
| 1987 | CHI3L2 | 5287 | IMPG1 | 8587 | PLXNB3 | 11887 | TRMT44 |
| 1988 | CHIA | 5288 | IMPG2 | 8588 | PLXNC1 | 11888 | TRMT5 |
| 1989 | CHIT1 | 5289 | INA | 8589 | PLXND1 | 11889 | TRMT6 |
| 1990 | CHKA | 5290 | INCENP | 8590 | PMAIP1 | 11890 | TRMT61A |
| 1991 | CHKB | 5291 | INF2 | 8591 | PMEL | 11891 | TRMT61B |
| 1992 | CHM | 5292 | ING1 | 8592 | PMEPA1 | 11892 | TRMU |
| 1993 | CHML | 5293 | ING2 | 8593 | PMF1 | 11893 | TRNAU1AP |
| 1994 | CHMP1A | 5294 | ING3 | 8594 | PML | 11894 | TRNT1 |
| 1995 | CHMP2A | 5295 | ING4 | 8595 | PMM1 | 11895 | TRO |
| 1996 | CHMP2B | 5296 | ING5 | 8596 | PMM2 | 11896 | TROAP |
| 1997 | CHMP3 | 5297 | INHA | 8597 | PMP2 | 11897 | TRPA1 |
| 1998 | CHMP4B | 5298 | INHBA | 8598 | PMP22 | 11898 | TRPC1 |
| 1999 | CHMP4C | 5299 | INHBB | 8599 | PMPCA | 11899 | TRPC3 |
| 2000 | CHMP5 | 5300 | INHBC | 8600 | PMPCB | 11900 | TRPC4AP |
| 2001 | CHN1 | 5301 | INO80 | 8601 | PMS1 | 11901 | TRPC6 |
| 2002 | CHODL | 5302 | INO80B | 8602 | PMS2 | 11902 | TRPM1 |
| 2003 | CHORDC1 | 5303 | INO80E | 8603 | PMS2P1 | 11903 | TRPM2 |
| 2004 | CHP1 | 5304 | INPP1 | 8604 | PMS2P2 | 11904 | TRPM2-AS |
| 2005 | CHP2 | 5305 | INPP4A | 8605 | PMVK | 11905 | TRPM3 |
| 2006 | CHPF | 5306 | INPP5A | 8606 | PNCK | 11906 | TRPM4 |
| 2007 | CHPF2 | 5307 | INPP5B | 8607 | PNISR | 11907 | TRPM6 |
| 2008 | CHPT1 | 5308 | INPP5D | 8608 | PNKD | 11908 | TRPM7 |
| 2009 | CHRAC1 | 5309 | INPP5E | 8609 | PNKP | 11909 | TRPM8 |
| 2010 | CHRD | 5310 | INPP5F | 8610 | PNLIP | 11910 | TRPS1 |
| 2011 | CHRDL1 | 5311 | INPP5J | 8611 | PNLIPRP2 | 11911 | TRPV1 |
| 2012 | CHRFAM7A | 5312 | INPP5K | 8612 | PNMA2 | 11912 | TRPV2 |
| 2013 | CHRM1 | 5313 | INPPL1 | 8613 | PNMT | 11913 | TRPV4 |
| 2014 | CHRM2 | 5314 | INS | 8614 | PNN | 11914 | TRPV5 |
| 2015 | CHRM3 | 5315 | INSIG1 | 8615 | PNOC | 11915 | TRPV6 |
| 2016 | CHRM4 | 5316 | INS-IGF2 | 8616 | PNP | 11916 | TRRAP |
| 2017 | CHRNA1 | 5317 | INSL3 | 8617 | PNPLA1 | 11917 | TRUB1 |
| 2018 | CHRNA2 | 5318 | INSM2 | 8618 | PNPLA2 | 11918 | TSBP1 |
| 2019 | CHRNA3 | 5319 | INSR | 8619 | PNPLA3 | 11919 | TSBP1-AS1 |
| 2020 | CHRNA4 | 5320 | INSRR | 8620 | PNPLA4 | 11920 | TSC1 |
| 2021 | CHRNA5 | 5321 | INTS1 | 8621 | PNPLA5 | 11921 | TSC2 |
| 2022 | CHRNA7 | 5322 | INTS10 | 8622 | PNPLA6 | 11922 | TSC22D1 |
| 2023 | CHRNA9 | 5323 | INTS11 | 8623 | PNPLA8 | 11923 | TSC22D3 |
| 2024 | CHRNB2 | 5324 | INTS12 | 8624 | PNPO | 11924 | TSC22D4 |
| 2025 | CHRNB3 | 5325 | INTS13 | 8625 | PNPT1 | 11925 | TSEN15 |
| 2026 | CHRNB4 | 5326 | INTS2 | 8626 | POC1A | 11926 | TSEN2 |
| 2027 | CHRNG | 5327 | INTS3 | 8627 | POC1B | 11927 | TSEN34 |
| 2028 | CHST1 | 5328 | INTS4 | 8628 | POC5 | 11928 | TSFM |
| 2029 | CHST10 | 5329 | INTS5 | 8629 | PODN | 11929 | TSG101 |
| 2030 | CHST11 | 5330 | INTS6 | 8630 | PODXL | 11930 | TSGA10IP |
| 2031 | CHST13 | 5331 | INTS8 | 8631 | PODXL2 | 11931 | TSGA13 |
| 2032 | CHST14 | 5332 | INTS9 | 8632 | POF1B | 11932 | TSHB |
| 2033 | CHST15 | 5333 | INVS | 8633 | POFUT1 | 11933 | TSHR |
| 2034 | CHST3 | 5334 | IP6K1 | 8634 | POFUT2 | 11934 | TSHZ1 |
| 2035 | CHST5 | 5335 | IP6K2 | 8635 | POGK | 11935 | TSHZ3 |
| 2036 | CHST6 | 5336 | IP6K3 | 8636 | POGLUT1 | 11936 | TSIX |
| 2037 | CHSY1 | 5337 | IPCEF1 | 8637 | POGZ | 11937 | TSKU |
| 2038 | CHTF8 | 5338 | IPMK | 8638 | POLA1 | 11938 | TSLP |
| 2039 | CHTOP | 5339 | IPO13 | 8639 | POLA2 | 11939 | TSN |
| 2040 | CHUK | 5340 | IPO4 | 8640 | POLB | 11940 | TSNAX |
| 2041 | CHURC1 | 5341 | IPO5 | 8641 | POLD1 | 11941 | TSPAN1 |
| 2042 | CIAO1 | 5342 | IPO7 | 8642 | POLD2 | 11942 | TSPAN12 |
| 2043 | CIAO2B | 5343 | IPO8 | 8643 | POLD3 | 11943 | TSPAN15 |
| 2044 | CIAO3 | 5344 | IPO9 | 8644 | POLD4 | 11944 | TSPAN16 |
| 2045 | CIAPIN1 | 5345 | IPP | 8645 | POLDIP2 | 11945 | TSPAN3 |
| 2046 | CIB1 | 5346 | IPPK | 8646 | POLDIP3 | 11946 | TSPAN32 |
| 2047 | CIC | 5347 | IPW | 8647 | POLE | 11947 | TSPAN33 |
| 2048 | CIDEA | 5348 | IQCA1 | 8648 | POLE2 | 11948 | TSPAN4 |
| 2049 | CIDEB | 5349 | IQCB1 | 8649 | POLE3 | 11949 | TSPAN7 |
| 2050 | CIDEC | 5350 | IQCD | 8650 | POLE4 | 11950 | TSPEAR-AS1 |
| 2051 | CIITA | 5351 | IQCE | 8651 | POLG | 11951 | TSPO |
| 2052 | CILD4 | 5352 | IQCG | 8652 | POLG2 | 11952 | TSPY1 |
| 2053 | CILD8 | 5353 | IQGAP1 | 8653 | POLH | 11953 | TSPYL1 |
| 2054 | CILK1 | 5354 | IQGAP2 | 8654 | POLI | 11954 | TSPYL2 |
| 2055 | CILP | 5355 | IQGAP3 | 8655 | POLK | 11955 | TSPYL5 |
| 2056 | CINP | 5356 | IQSEC1 | 8656 | POLL | 11956 | TSR1 |
| 2057 | CIP2A | 5357 | IQSEC2 | 8657 | POLM | 11957 | TSR2 |
| 2058 | CIRBP | 5358 | IRAG2 | 8658 | POLN | 11958 | TSSC4 |
| 2059 | CISD1 | 5359 | IRAK1 | 8659 | POLQ | 11959 | TSSK3 |
| 2060 | CISD2 | 5360 | IRAK2 | 8660 | POLR1A | 11960 | TST |
| 2061 | CISD3 | 5361 | IRAK3 | 8661 | POLR1B | 11961 | TTBK1 |
| 2062 | CISH | 5362 | IRAK4 | 8662 | POLR1C | 11962 | TTBK2 |
| 2063 | CIT | 5363 | IREB2 | 8663 | POLR1D | 11963 | TTC1 |
| 2064 | CITED1 | 5364 | IRF1 | 8664 | POLR1F | 11964 | TTC12 |
| 2065 | CITED2 | 5365 | IRF2 | 8665 | POLR1G | 11965 | TTC14 |
| 2066 | CIZ1 | 5366 | IRF2BP1 | 8666 | POLR1H | 11966 | TTC19 |
| 2067 | CKAP2 | 5367 | IRF2BP2 | 8667 | POLR2A | 11967 | TTC21B |
| 2068 | CKAP4 | 5368 | IRF2BPL | 8668 | POLR2B | 11968 | TTC25 |
| 2069 | CKAP5 | 5369 | IRF3 | 8669 | POLR2C | 11969 | TTC28 |
| 2070 | CKB | 5370 | IRF4 | 8670 | POLR2D | 11970 | TTC29 |
| 2071 | CKM | 5371 | IRF5 | 8671 | POLR2E | 11971 | TTC3 |
| 2072 | CKMT1A | 5372 | IRF6 | 8672 | POLR2F | 11972 | TTC30A |
| 2073 | CKMT1B | 5373 | IRF7 | 8673 | POLR2G | 11973 | TTC30B |
| 2074 | CKMT2 | 5374 | IRF8 | 8674 | POLR2H | 11974 | TTC33 |
| 2075 | CKS1B | 5375 | IRF9 | 8675 | POLR2I | 11975 | TTC36 |
| 2076 | CKS2 | 5376 | IRGM | 8676 | POLR2J | 11976 | TTC37 |
| 2077 | CLASP1 | 5377 | IRS1 | 8677 | POLR2K | 11977 | TTC38 |
| 2078 | CLASP2 | 5378 | IRS2 | 8678 | POLR2L | 11978 | TTC39B |
| 2079 | CLASRP | 5379 | IRS4 | 8679 | POLR3A | 11979 | TTC4 |
| 2080 | CLC | 5380 | IRX1 | 8680 | POLR3B | 11980 | TTC7A |
| 2081 | CLCA1 | 5381 | IRX3 | 8681 | POLR3C | 11981 | TTC8 |
| 2082 | CLCA2 | 5382 | IRX5 | 8682 | POLR3D | 11982 | TTF1 |
| 2083 | CLCA4 | 5383 | ISCA1 | 8683 | POLR3E | 11983 | TTF2 |
| 2084 | CLCC1 | 5384 | ISCA2 | 8684 | POLR3F | 11984 | TTI1 |
| 2085 | CLCF1 | 5385 | ISCU | 8685 | POLR3G | 11985 | TTK |
| 2086 | CLCN1 | 5386 | ISG15 | 8686 | POLR3H | 11986 | TTLL1 |
| 2087 | CLCN2 | 5387 | ISG20 | 8687 | POLR3K | 11987 | TTLL12 |
| 2088 | CLCN3 | 5388 | ISL1 | 8688 | POLRMT | 11988 | TTLL3 |
| 2089 | CLCN4 | 5389 | ISLR2 | 8689 | POM121 | 11989 | TTLL4 |
| 2090 | CLCN5 | 5390 | ISOC2 | 8690 | POM121C | 11990 | TTLL6 |
| 2091 | CLCN7 | 5391 | IST1 | 8691 | POMC | 11991 | TTLL9 |
| 2092 | CLCNKA | 5392 | ISX | 8692 | POMGNT1 | 11992 | TTN |
| 2093 | CLCNKB | 5393 | ISYNA1 | 8693 | POMGNT2 | 11993 | TTN-AS1 |
| 2094 | CLDN1 | 5394 | ITCH | 8694 | POMP | 11994 | TTPA |
| 2095 | CLDN10 | 5395 | ITFG1 | 8695 | POMT1 | 11995 | TTR |
| 2096 | CLDN11 | 5396 | ITGA1 | 8696 | POMT2 | 11996 | TTYH3 |
| 2097 | CLDN12 | 5397 | ITGA11 | 8697 | PON1 | 11997 | TUBA1A |
| 2098 | CLDN14 | 5398 | ITGA2 | 8698 | PON2 | 11998 | TUBA1B |
| 2099 | CLDN15 | 5399 | ITGA2B | 8699 | PON3 | 11999 | TUBA1C |
| 2100 | CLDN16 | 5400 | ITGA3 | 8700 | POP4 | 12000 | TUBA3C |
| 2101 | CLDN18 | 5401 | ITGA4 | 8701 | POR | 12001 | TUBA4A |
| 2102 | CLDN19 | 5402 | ITGA5 | 8702 | PORCN | 12002 | TUBA4B |
| 2103 | CLDN2 | 5403 | ITGA6 | 8703 | POSTN | 12003 | TUBA8 |
| 2104 | CLDN3 | 5404 | ITGA7 | 8704 | POT1 | 12004 | TUBB |
| 2105 | CLDN4 | 5405 | ITGA8 | 8705 | POTEE | 12005 | TUBB1 |
| 2106 | CLDN5 | 5406 | ITGA9 | 8706 | POTEF | 12006 | TUBB2A |
| 2107 | CLDN6 | 5407 | ITGAD | 8707 | POTEF-AS1 | 12007 | TUBB2B |
| 2108 | CLDN7 | 5408 | ITGAE | 8708 | POU1F1 | 12008 | TUBB3 |
| 2109 | CLDN8 | 5409 | ITGAL | 8709 | POU2AF1 | 12009 | TUBB4A |
| 2110 | CLDN9 | 5410 | ITGAM | 8710 | POU2F1 | 12010 | TUBB4B |
| 2111 | CLEC11A | 5411 | ITGAV | 8711 | POU2F2 | 12011 | TUBB6 |
| 2112 | CLEC12A | 5412 | ITGAX | 8712 | POU2F3 | 12012 | TUBD1 |
| 2113 | CLEC12B | 5413 | ITGB1 | 8713 | POU3F1 | 12013 | TUBG1 |
| 2114 | CLEC16A | 5414 | ITGB2 | 8714 | POU3F2 | 12014 | TUBGCP3 |
| 2115 | CLEC1A | 5415 | ITGB3 | 8715 | POU4F1 | 12015 | TUBGCP4 |
| 2116 | CLEC1B | 5416 | ITGB3BP | 8716 | POU5F1 | 12016 | TUBGCP6 |
| 2117 | CLEC2A | 5417 | ITGB4 | 8717 | POU5F1B | 12017 | TUFM |
| 2118 | CLEC2D | 5418 | ITGB5 | 8718 | POU6F2 | 12018 | TUFT1 |
| 2119 | CLEC3B | 5419 | ITGB6 | 8719 | PPA1 | 12019 | TUG1 |
| 2120 | CLEC4A | 5420 | ITGB7 | 8720 | PPA2 | 12020 | TULP1 |
| 2121 | CLEC4C | 5421 | ITGB8 | 8721 | PPAN | 12021 | TULP3 |
| 2122 | CLEC4D | 5422 | ITGBL1 | 8722 | PPARA | 12022 | TULP4 |
| 2123 | CLEC4E | 5423 | ITIH1 | 8723 | PPARD | 12023 | TUSC1 |
| 2124 | CLEC4G | 5424 | ITIH3 | 8724 | PPARG | 12024 | TUSC2 |
| 2125 | CLEC4M | 5425 | ITIH4 | 8725 | PPARGC1A | 12025 | TUSC3 |
| 2126 | CLEC5A | 5426 | ITIH5 | 8726 | PPARGC1B | 12026 | TUT1 |
| 2127 | CLEC6A | 5427 | ITK | 8727 | PPAT | 12027 | TUT4 |
| 2128 | CLEC7A | 5428 | ITLN1 | 8728 | PPBP | 12028 | TUT7 |
| 2129 | CLEC9A | 5429 | ITM2B | 8729 | PPCS | 12029 | TWF1 |
| 2130 | CLIC1 | 5430 | ITPA | 8730 | PPFIA1 | 12030 | TWIST1 |
| 2131 | CLIC2 | 5431 | ITPK1 | 8731 | PPFIA2 | 12031 | TWIST2 |
| 2132 | CLIC4 | 5432 | ITPKC | 8732 | PPFIBP1 | 12032 | TWNK |
| 2133 | CLIC5 | 5433 | ITPR1 | 8733 | PPHLN1 | 12033 | TWSG1 |
| 2134 | CLINT1 | 5434 | ITPR2 | 8734 | PPIA | 12034 | TXK |
| 2135 | CLIP1 | 5435 | ITPR3 | 8735 | PPIAP63 | 12035 | TXLNA |
| 2136 | CLIP2 | 5436 | ITPRID2 | 8736 | PPIB | 12036 | TXLNG |
| 2137 | CLK1 | 5437 | ITPRIP | 8737 | PPIC | 12037 | TXN |
| 2138 | CLK2 | 5438 | ITPRIPL2 | 8738 | PPID | 12038 | TXN2 |
| 2139 | CLK3 | 5439 | ITSN1 | 8739 | PPIE | 12039 | TXNDC12 |
| 2140 | CLK4 | 5440 | ITSN2 | 8740 | PPIEL | 12040 | TXNDC15 |
| 2141 | CLMP | 5441 | IVD | 8741 | PPIF | 12041 | TXNDC17 |
| 2142 | CLN3 | 5442 | IVL | 8742 | PPIG | 12042 | TXNDC2 |
| 2143 | CLN5 | 5443 | IVNS1ABP | 8743 | PPIH | 12043 | TXNDC5 |
| 2144 | CLN6 | 5444 | IWS1 | 8744 | PPIL2 | 12044 | TXNDC9 |
| 2145 | CLN8 | 5445 | IYD | 8745 | PPIL4 | 12045 | TXNIP |
| 2146 | CLNS1A | 5446 | JADE1 | 8746 | PPIP5K2 | 12046 | TXNL1 |
| 2147 | CLOCK | 5447 | JADRR | 8747 | PPL | 12047 | TXNL4A |
| 2148 | CLPB | 5448 | JAG1 | 8748 | PPM1A | 12048 | TXNL4B |
| 2149 | CLPP | 5449 | JAG2 | 8749 | PPM1B | 12049 | TXNRD1 |
| 2150 | CLPS | 5450 | JAGN1 | 8750 | PPM1D | 12050 | TXNRD2 |
| 2151 | CLPTM1 | 5451 | JAK1 | 8751 | PPM1E | 12051 | TYK2 |
| 2152 | CLPTM1L | 5452 | JAK2 | 8752 | PPM1F | 12052 | TYMP |
| 2153 | CLPX | 5453 | JAK3 | 8753 | PPM1G | 12053 | TYMS |
| 2154 | CLRN1 | 5454 | JAKMIP1 | 8754 | PPM1K | 12054 | TYR |
| 2155 | CLSPN | 5455 | JAM2 | 8755 | PPME1 | 12055 | TYRO3 |
| 2156 | CLSTN1 | 5456 | JAM3 | 8756 | PPOX | 12056 | TYROBP |
| 2157 | CLTA | 5457 | JARID2 | 8757 | PPP1CA | 12057 | TYRP1 |
| 2158 | CLTB | 5458 | JAZF1 | 8758 | PPP1CB | 12058 | TYSND1 |
| 2159 | CLTC | 5459 | JCAD | 8759 | PPP1CC | 12059 | TYW1 |
| 2160 | CLTCL1 | 5460 | JCHAIN | 8760 | PPP1R10 | 12060 | U2AF1 |
| 2161 | CLTRN | 5461 | JDP2 | 8761 | PPP1R11 | 12061 | U2AF1L4 |
| 2162 | CLU | 5462 | JKAMP | 8762 | PPP1R12A | 12062 | U2AF2 |
| 2163 | CLUH | 5463 | JMJD1C | 8763 | PPP1R12B | 12063 | U2SURP |
| 2164 | CLUL1 | 5464 | JMJD6 | 8764 | PPP1R12C | 12064 | UACA |
| 2165 | CLVS1 | 5465 | JMJD8 | 8765 | PPP1R13B | 12065 | UAP1 |
| 2166 | CLYBL | 5466 | JMY | 8766 | PPP1R13L | 12066 | UBA1 |
| 2167 | CMA1 | 5467 | JOSD1 | 8767 | PPP1R14A | 12067 | UBA2 |
| 2168 | CMAS | 5468 | JOSD2 | 8768 | PPP1R14B | 12068 | UBA5 |
| 2169 | CMBL | 5469 | JPH1 | 8769 | PPP1R14C | 12069 | UBA52 |
| 2170 | CMC2 | 5470 | JPH2 | 8770 | PPP1R15A | 12070 | UBA6 |
| 2171 | CMIP | 5471 | JPH3 | 8771 | PPP1R15B | 12071 | UBA7 |
| 2172 | CMKLR1 | 5472 | JPH4 | 8772 | PPP1R16B | 12072 | UBAC1 |
| 2173 | CMPK1 | 5473 | JPT1 | 8773 | PPP1R18 | 12073 | UBAP1 |
| 2174 | CMSS1 | 5474 | JPT2 | 8774 | PPP1R1A | 12074 | UBAP2 |
| 2175 | CMTM5 | 5475 | JTB | 8775 | PPP1R1B | 12075 | UBAP2L |
| 2176 | CMTM6 | 5476 | JUN | 8776 | PPP1R2 | 12076 | UBASH3A |
| 2177 | CMTR1 | 5477 | JUNB | 8777 | PPP1R26 | 12077 | UBASH3B |
| 2178 | CMTR2 | 5478 | JUND | 8778 | PPP1R3A | 12078 | UBB |
| 2179 | CMYA5 | 5479 | JUP | 8779 | PPP1R3B | 12079 | UBC |
| 2180 | CNBP | 5480 | KAAG1 | 8780 | PPP1R3D | 12080 | UBD |
| 2181 | CNDP1 | 5481 | KALRN | 8781 | PPP1R3E | 12081 | UBE2A |
| 2182 | CNDP2 | 5482 | KANK1 | 8782 | PPP1R7 | 12082 | UBE2B |
| 2183 | CNGA3 | 5483 | KANK2 | 8783 | PPP1R8 | 12083 | UBE2C |
| 2184 | CNGB1 | 5484 | KANK4 | 8784 | PPP1R9A | 12084 | UBE2D1 |
| 2185 | CNGB3 | 5485 | KANSL1 | 8785 | PPP1R9B | 12085 | UBE2D2 |
| 2186 | CNKSR1 | 5486 | KANSL1-AS1 | 8786 | PPP2CA | 12086 | UBE2D3 |
| 2187 | CNKSR2 | 5487 | KANSL1L | 8787 | PPP2CB | 12087 | UBE2D4 |
| 2188 | CNKSR3 | 5488 | KANSL2 | 8788 | PPP2R1A | 12088 | UBE2E1 |
| 2189 | CNMD | 5489 | KANSL3 | 8789 | PPP2R1B | 12089 | UBE2E2 |
| 2190 | CNN1 | 5490 | KARS1 | 8790 | PPP2R2A | 12090 | UBE2E3 |
| 2191 | CNN2 | 5491 | KAT2A | 8791 | PPP2R2B | 12091 | UBE2G1 |
| 2192 | CNN3 | 5492 | KAT2B | 8792 | PPP2R2C | 12092 | UBE2G2 |
| 2193 | CNNM1 | 5493 | KAT5 | 8793 | PPP2R2D | 12093 | UBE2H |
| 2194 | CNNM2 | 5494 | KAT6A | 8794 | PPP2R3A | 12094 | UBE2I |
| 2195 | CNNM3 | 5495 | KAT6B | 8795 | PPP2R3B | 12095 | UBE2J1 |
| 2196 | CNNM4 | 5496 | KAT7 | 8796 | PPP2R5A | 12096 | UBE2K |
| 2197 | CNOT1 | 5497 | KAT8 | 8797 | PPP2R5B | 12097 | UBE2L3 |
| 2198 | CNOT10 | 5498 | KATNAL1 | 8798 | PPP2R5C | 12098 | UBE2L6 |
| 2199 | CNOT11 | 5499 | KATNAL2 | 8799 | PPP2R5D | 12099 | UBE2M |
| 2200 | CNOT2 | 5500 | KATNB1 | 8800 | PPP2R5E | 12100 | UBE2N |
| 2201 | CNOT3 | 5501 | KATNIP | 8801 | PPP3CA | 12101 | UBE2O |
| 2202 | CNOT4 | 5502 | KAZN | 8802 | PPP3CB | 12102 | UBE2Q1 |
| 2203 | CNOT6 | 5503 | KCMF1 | 8803 | PPP3CC | 12103 | UBE2QL1 |
| 2204 | CNOT6L | 5504 | KCNA1 | 8804 | PPP3R1 | 12104 | UBE2R2 |
| 2205 | CNOT7 | 5505 | KCNA2 | 8805 | PPP3R2 | 12105 | UBE2S |
| 2206 | CNOT8 | 5506 | KCNA4 | 8806 | PPP4C | 12106 | UBE2T |
| 2207 | CNP | 5507 | KCNA5 | 8807 | PPP4R2 | 12107 | UBE2V1 |
| 2208 | CNPY2 | 5508 | KCNAB1 | 8808 | PPP4R3A | 12108 | UBE2V2 |
| 2209 | CNPY3 | 5509 | KCNAB2 | 8809 | PPP4R3B | 12109 | UBE2W |
| 2210 | CNR1 | 5510 | KCNAB3 | 8810 | PPP4R4 | 12110 | UBE3A |
| 2211 | CNR2 | 5511 | KCNB1 | 8811 | PPP5C | 12111 | UBE3B |
| 2212 | CNST | 5512 | KCNC1 | 8812 | PPP6C | 12112 | UBE3C |
| 2213 | CNTF | 5513 | KCNC3 | 8813 | PPP6R1 | 12113 | UBE4A |
| 2214 | CNTFR | 5514 | KCNC4 | 8814 | PPP6R2 | 12114 | UBE4B |
| 2215 | CNTLN | 5515 | KCND2 | 8815 | PPP6R3 | 12115 | UBFD1 |
| 2216 | CNTN1 | 5516 | KCND3 | 8816 | PPRC1 | 12116 | UBIAD1 |
| 2217 | CNTN2 | 5517 | KCNE1 | 8817 | PPT1 | 12117 | UBL4A |
| 2218 | CNTN4 | 5518 | KCNE2 | 8818 | PPWD1 | 12118 | UBL5 |
| 2219 | CNTN5 | 5519 | KCNE3 | 8819 | PPY | 12119 | UBL7 |
| 2220 | CNTNAP1 | 5520 | KCNE4 | 8820 | PQBP1 | 12120 | UBN1 |
| 2221 | CNTNAP2 | 5521 | KCNG1 | 8821 | PRAC1 | 12121 | UBN2 |
| 2222 | CNTROB | 5522 | KCNH1 | 8822 | PRAC2 | 12122 | UBOX5 |
| 2223 | COA3 | 5523 | KCNH2 | 8823 | PRAF2 | 12123 | UBP1 |
| 2224 | COA4 | 5524 | KCNH3 | 8824 | PRAM1 | 12124 | UBQLN1 |
| 2225 | COA5 | 5525 | KCNH5 | 8825 | PRAME | 12125 | UBQLN2 |
| 2226 | COA6 | 5526 | KCNIP1 | 8826 | PRAP1 | 12126 | UBQLN4 |
| 2227 | COA7 | 5527 | KCNIP3 | 8827 | PRB1 | 12127 | UBR1 |
| 2228 | COA8 | 5528 | KCNIP4 | 8828 | PRC1 | 12128 | UBR2 |
| 2229 | COASY | 5529 | KCNJ1 | 8829 | PRCC | 12129 | UBR3 |
| 2230 | COBL | 5530 | KCNJ10 | 8830 | PRCP | 12130 | UBR4 |
| 2231 | COBLL1 | 5531 | KCNJ11 | 8831 | PRDM1 | 12131 | UBR5 |
| 2232 | COCH | 5532 | KCNJ13 | 8832 | PRDM10 | 12132 | UBTD1 |
| 2233 | COG1 | 5533 | KCNJ18 | 8833 | PRDM14 | 12133 | UBTF |
| 2234 | COG2 | 5534 | KCNJ3 | 8834 | PRDM15 | 12134 | UBXN1 |
| 2235 | COG3 | 5535 | KCNJ5 | 8835 | PRDM16 | 12135 | UBXN2A |
| 2236 | COG4 | 5536 | KCNJ6 | 8836 | PRDM16-DT | 12136 | UBXN2B |
| 2237 | COG5 | 5537 | KCNJ8 | 8837 | PRDM2 | 12137 | UBXN4 |
| 2238 | COG6 | 5538 | KCNK15-AS1 | 8838 | PRDM4 | 12138 | UBXN6 |
| 2239 | COG7 | 5539 | KCNK18 | 8839 | PRDM5 | 12139 | UCA1 |
| 2240 | COG8 | 5540 | KCNK3 | 8840 | PRDM6 | 12140 | UCHL1 |
| 2241 | COIL | 5541 | KCNK4 | 8841 | PRDM8 | 12141 | UCHL3 |
| 2242 | COL10A1 | 5542 | KCNK5 | 8842 | PRDX1 | 12142 | UCHL5 |
| 2243 | COL11A1 | 5543 | KCNK6 | 8843 | PRDX2 | 12143 | UCK2 |
| 2244 | COL11A2 | 5544 | KCNK9 | 8844 | PRDX3 | 12144 | UCKL1 |
| 2245 | COL12A1 | 5545 | KCNMA1 | 8845 | PRDX4 | 12145 | UCMA |
| 2246 | COL13A1 | 5546 | KCNMB1 | 8846 | PRDX5 | 12146 | UCN |
| 2247 | COL14A1 | 5547 | KCNN1 | 8847 | PRDX6 | 12147 | UCN2 |
| 2248 | COL15A1 | 5548 | KCNN2 | 8848 | PREB | 12148 | UCN3 |
| 2249 | COL17A1 | 5549 | KCNN3 | 8849 | PRELID1 | 12149 | UCP1 |
| 2250 | COL18A1 | 5550 | KCNN4 | 8850 | PRELP | 12150 | UCP2 |
| 2251 | COL1A1 | 5551 | KCNQ1 | 8851 | PREP | 12151 | UCP3 |
| 2252 | COL1A2 | 5552 | KCNQ1DN | 8852 | PREPL | 12152 | UFC1 |
| 2253 | COL20A1 | 5553 | KCNQ1OT1 | 8853 | PREX1 | 12153 | UFD1 |
| 2254 | COL25A1 | 5554 | KCNQ2 | 8854 | PREX2 | 12154 | UFL1 |
| 2255 | COL26A1 | 5555 | KCNQ4 | 8855 | PRF1 | 12155 | UFM1 |
| 2256 | COL27A1 | 5556 | KCNQ5 | 8856 | PRG2 | 12156 | UGCG |
| 2257 | COL2A1 | 5557 | KCNRG | 8857 | PRG4 | 12157 | UGDH |
| 2258 | COL3A1 | 5558 | KCNT1 | 8858 | PRH1 | 12158 | UGGT1 |
| 2259 | COL4A1 | 5559 | KCNT2 | 8859 | PRH2 | 12159 | UGGT2 |
| 2260 | COL4A2 | 5560 | KCNV2 | 8860 | PRICKLE1 | 12160 | UGP2 |
| 2261 | COL4A2-AS2 | 5561 | KCP | 8861 | PRICKLE3 | 12161 | UGT1A |
| 2262 | COL4A3 | 5562 | KCTD1 | 8862 | PRICKLE4 | 12162 | UGT1A1 |
| 2263 | COL4A4 | 5563 | KCTD10 | 8863 | PRIM1 | 12163 | UGT1A10 |
| 2264 | COL4A5 | 5564 | KCTD12 | 8864 | PRIMPOL | 12164 | UGT1A3 |
| 2265 | COL4A6 | 5565 | KCTD13 | 8865 | PRINS | 12165 | UGT1A4 |
| 2266 | COL5A1 | 5566 | KCTD14 | 8866 | PRKAA1 | 12166 | UGT1A5 |
| 2267 | COL5A2 | 5567 | KCTD15 | 8867 | PRKAA2 | 12167 | UGT1A6 |
| 2268 | COL5A3 | 5568 | KCTD17 | 8868 | PRKAB1 | 12168 | UGT1A7 |
| 2269 | COL6A1 | 5569 | KCTD3 | 8869 | PRKAB2 | 12169 | UGT1A8 |
| 2270 | COL6A2 | 5570 | KCTD5 | 8870 | PRKACA | 12170 | UGT1A9 |
| 2271 | COL6A3 | 5571 | KCTD6 | 8871 | PRKACB | 12171 | UGT2A2 |
| 2272 | COL6A5 | 5572 | KCTD7 | 8872 | PRKACG | 12172 | UGT2B15 |
| 2273 | COL6A6 | 5573 | KCTD9 | 8873 | PRKAG1 | 12173 | UGT2B17 |
| 2274 | COL7A1 | 5574 | KDELR1 | 8874 | PRKAG2 | 12174 | UGT2B4 |
| 2275 | COL8A1 | 5575 | KDELR2 | 8875 | PRKAG3 | 12175 | UGT2B7 |
| 2276 | COL8A2 | 5576 | KDM1A | 8876 | PRKAR1A | 12176 | UGT8 |
| 2277 | COL9A1 | 5577 | KDM1B | 8877 | PRKAR1B | 12177 | UHMK1 |
| 2278 | COL9A2 | 5578 | KDM2A | 8878 | PRKAR2A | 12178 | UHRF1 |
| 2279 | COL9A3 | 5579 | KDM2B | 8879 | PRKAR2B | 12179 | UHRF1BP1 |
| 2280 | COLEC11 | 5580 | KDM3A | 8880 | PRKCA | 12180 | UHRF2 |
| 2281 | COLEC12 | 5581 | KDM3B | 8881 | PRKCB | 12181 | UIMC1 |
| 2282 | COLGALT1 | 5582 | KDM4A | 8882 | PRKCD | 12182 | ULBP1 |
| 2283 | COLQ | 5583 | KDM4B | 8883 | PRKCE | 12183 | ULBP2 |
| 2284 | COMMD1 | 5584 | KDM4C | 8884 | PRKCG | 12184 | ULBP3 |
| 2285 | COMMD10 | 5585 | KDM4D | 8885 | PRKCH | 12185 | ULK1 |
| 2286 | COMMD5 | 5586 | KDM5A | 8886 | PRKCI | 12186 | ULK2 |
| 2287 | COMP | 5587 | KDM5B | 8887 | PRKCQ | 12187 | ULK4 |
| 2288 | COMT | 5588 | KDM5C | 8888 | PRKCSH | 12188 | UMOD |
| 2289 | COMTD1 | 5589 | KDM6A | 8889 | PRKCZ | 12189 | UMPS |
| 2290 | COP1 | 5590 | KDM6B | 8890 | PRKD1 | 12190 | UNC119 |
| 2291 | COPA | 5591 | KDM8 | 8891 | PRKD2 | 12191 | UNC119B |
| 2292 | COPB1 | 5592 | KDR | 8892 | PRKD3 | 12192 | UNC13A |
| 2293 | COPB2 | 5593 | KDSR | 8893 | PRKDC | 12193 | UNC13B |
| 2294 | COPE | 5594 | KEAP1 | 8894 | PRKG1 | 12194 | UNC13D |
| 2295 | COPG1 | 5595 | KEL | 8895 | PRKG2 | 12195 | UNC45A |
| 2296 | COPG2 | 5596 | KERA | 8896 | PRKN | 12196 | UNC45B |
| 2297 | COPS2 | 5597 | KHDC3L | 8897 | PRKRA | 12197 | UNC5A |
| 2298 | COPS3 | 5598 | KHDC4 | 8898 | PRKRIP1 | 12198 | UNC5B |
| 2299 | COPS4 | 5599 | KHDRBS1 | 8899 | PRL | 12199 | UNC5C |
| 2300 | COPS5 | 5600 | KHDRBS2 | 8900 | PRLR | 12200 | UNC5D |
| 2301 | COPS6 | 5601 | KHK | 8901 | PRM1 | 12201 | UNC80 |
| 2302 | COPS7A | 5602 | KHSRP | 8902 | PRM3 | 12202 | UNC93A |
| 2303 | COPS8 | 5603 | KIAA0232 | 8903 | PRMT1 | 12203 | UNC93B1 |
| 2304 | COPS9 | 5604 | KIAA0319 | 8904 | PRMT2 | 12204 | UNG |
| 2305 | COPZ1 | 5605 | KIAA0319L | 8905 | PRMT3 | 12205 | UNK |
| 2306 | COQ2 | 5606 | KIAA0586 | 8906 | PRMT5 | 12206 | UOX |
| 2307 | COQ3 | 5607 | KIAA0753 | 8907 | PRMT6 | 12207 | UPB1 |
| 2308 | COQ4 | 5608 | KIAA0930 | 8908 | PRMT7 | 12208 | UPF1 |
| 2309 | COQ5 | 5609 | KIAA1109 | 8909 | PRMT9 | 12209 | UPF2 |
| 2310 | COQ6 | 5610 | KIAA1143 | 8910 | PRNCR1 | 12210 | UPK1A |
| 2311 | COQ7 | 5611 | KIAA1217 | 8911 | PRND | 12211 | UPK2 |
| 2312 | COQ8A | 5612 | KIAA1522 | 8912 | PRNP | 12212 | UPK3A |
| 2313 | COQ8B | 5613 | KIAA1549 | 8913 | PRNT | 12213 | UPP1 |
| 2314 | COQ9 | 5614 | KIAA1549L | 8914 | PROC | 12214 | UPP2 |
| 2315 | CORIN | 5615 | KIAA1614 | 8915 | PROCR | 12215 | UQCC1 |
| 2316 | CORO1A | 5616 | KIAA1671 | 8916 | PRODH | 12216 | UQCC2 |
| 2317 | CORO1B | 5617 | KIDINS220 | 8917 | PRODH2 | 12217 | UQCC3 |
| 2318 | CORO1C | 5618 | KIF11 | 8918 | PROK1 | 12218 | UQCRB |
| 2319 | CORO2A | 5619 | KIF12 | 8919 | PROK2 | 12219 | UQCRC1 |
| 2320 | CORT | 5620 | KIF13A | 8920 | PROKR1 | 12220 | UQCRC2 |
| 2321 | COTL1 | 5621 | KIF13B | 8921 | PROM1 | 12221 | UQCRFS1 |
| 2322 | COX10 | 5622 | KIF14 | 8922 | PROM2 | 12222 | UQCRH |
| 2323 | COX10-AS1 | 5623 | KIF15 | 8923 | PROP1 | 12223 | UQCRQ |
| 2324 | COX14 | 5624 | KIF16B | 8924 | PROS1 | 12224 | URB1 |
| 2325 | COX15 | 5625 | KIF17 | 8925 | PROSER2 | 12225 | URB2 |
| 2326 | COX16 | 5626 | KIF18A | 8926 | PROX1 | 12226 | URGCP |
| 2327 | COX17 | 5627 | KIF18B | 8927 | PROZ | 12227 | URI1 |
| 2328 | COX20 | 5628 | KIF1A | 8928 | PRPF19 | 12228 | UROD |
| 2329 | COX4I1 | 5629 | KIF1B | 8929 | PRPF3 | 12229 | UROS |
| 2330 | COX4I2 | 5630 | KIF1C | 8930 | PRPF31 | 12230 | USB1 |
| 2331 | COX5A | 5631 | KIF20A | 8931 | PRPF38A | 12231 | USE1 |
| 2332 | COX5B | 5632 | KIF20B | 8932 | PRPF38B | 12232 | USF1 |
| 2333 | COX6A1 | 5633 | KIF21A | 8933 | PRPF39 | 12233 | USF2 |
| 2334 | COX6B1 | 5634 | KIF22 | 8934 | PRPF4 | 12234 | USH1C |
| 2335 | COX6B2 | 5635 | KIF23 | 8935 | PRPF40A | 12235 | USH2A |
| 2336 | COX6C | 5636 | KIF24 | 8936 | PRPF40B | 12236 | USO1 |
| 2337 | COX7B | 5637 | KIF26B | 8937 | PRPF4B | 12237 | USP1 |
| 2338 | COX7C | 5638 | KIF27 | 8938 | PRPF6 | 12238 | USP10 |
| 2339 | COX8A | 5639 | KIF2A | 8939 | PRPF8 | 12239 | USP11 |
| 2340 | COX8C | 5640 | KIF2B | 8940 | PRPH | 12240 | USP13 |
| 2341 | CP | 5641 | KIF2C | 8941 | PRPH2 | 12241 | USP14 |
| 2342 | CPA1 | 5642 | KIF3A | 8942 | PRPS1 | 12242 | USP15 |
| 2343 | CPA3 | 5643 | KIF3B | 8943 | PRPS1L1 | 12243 | USP16 |
| 2344 | CPA4 | 5644 | KIF4A | 8944 | PRPS2 | 12244 | USP17L1 |
| 2345 | CPA5 | 5645 | KIF5A | 8945 | PRPSAP1 | 12245 | USP17L10 |
| 2346 | CPA6 | 5646 | KIF5B | 8946 | PRPSAP2 | 12246 | USP17L11 |
| 2347 | CPB1 | 5647 | KIF7 | 8947 | PRR11 | 12247 | USP17L12 |
| 2348 | CPB2 | 5648 | KIFAP3 | 8948 | PRR12 | 12248 | USP17L13 |
| 2349 | CPD | 5649 | KIFBP | 8949 | PRR14 | 12249 | USP17L14P |
| 2350 | CPE | 5650 | KIFC1 | 8950 | PRR16 | 12250 | USP17L15 |
| 2351 | CPEB1 | 5651 | KIFC2 | 8951 | PRR3 | 12251 | USP17L16P |
| 2352 | CPEB2 | 5652 | KIFC3 | 8952 | PRR5 | 12252 | USP17L17 |
| 2353 | CPEB4 | 5653 | KIR2DL1 | 8953 | PRRC2A | 12253 | USP17L18 |
| 2354 | CPLANE1 | 5654 | KIR2DL2 | 8954 | PRRC2B | 12254 | USP17L19 |
| 2355 | CPLX1 | 5655 | KIR2DL3 | 8955 | PRRC2C | 12255 | USP17L2 |
| 2356 | CPM | 5656 | KIR2DL4 | 8956 | PRRG1 | 12256 | USP17L20 |
| 2357 | CPN1 | 5657 | KIR2DL5A | 8957 | PRRT2 | 12257 | USP17L21 |
| 2358 | CPNE1 | 5658 | KIR2DS1 | 8958 | PRRX1 | 12258 | USP17L22 |
| 2359 | CPNE2 | 5659 | KIR2DS2 | 8959 | PRSS1 | 12259 | USP17L24 |
| 2360 | CPNE3 | 5660 | KIR2DS3 | 8960 | PRSS16 | 12260 | USP17L25 |
| 2361 | CPNE4 | 5661 | KIR2DS4 | 8961 | PRSS2 | 12261 | USP17L26 |
| 2362 | CPNE5 | 5662 | KIR2DS5 | 8962 | PRSS23 | 12262 | USP17L27 |
| 2363 | CPNE6 | 5663 | KIR3DL1 | 8963 | PRSS3 | 12263 | USP17L28 |
| 2364 | CPNE7 | 5664 | KIR3DL2 | 8964 | PRSS50 | 12264 | USP17L29 |
| 2365 | CPNE8 | 5665 | KIR3DL3 | 8965 | PRSS57 | 12265 | USP17L3 |
| 2366 | CPNE9 | 5666 | KIR3DS1 | 8966 | PRSS8 | 12266 | USP17L30 |
| 2367 | CPOX | 5667 | KIRREL1 | 8967 | PRTN3 | 12267 | USP17L4 |
| 2368 | CPPED1 | 5668 | KIRREL2 | 8968 | PRUNE1 | 12268 | USP17L5 |
| 2369 | CPQ | 5669 | KIRREL3 | 8969 | PRUNE2 | 12269 | USP17L6P |
| 2370 | CPS1 | 5670 | KISS1 | 8970 | PRX | 12270 | USP17L7 |
| 2371 | CPSF1 | 5671 | KISS1R | 8971 | PSAP | 12271 | USP17L8 |
| 2372 | CPSF2 | 5672 | KIT | 8972 | PSAT1 | 12272 | USP17L9P |
| 2373 | CPSF3 | 5673 | KITLG | 8973 | PSC | 12273 | USP18 |
| 2374 | CPSF4 | 5674 | KL | 8974 | PSCA | 12274 | USP19 |
| 2375 | CPSF6 | 5675 | KLB | 8975 | PSD2 | 12275 | USP2 |
| 2376 | CPSF7 | 5676 | KLC1 | 8976 | PSD3 | 12276 | USP20 |
| 2377 | CPT1A | 5677 | KLC2 | 8977 | PSEN1 | 12277 | USP21 |
| 2378 | CPT1B | 5678 | KLC4 | 8978 | PSEN2 | 12278 | USP22 |
| 2379 | CPT1C | 5679 | KLF1 | 8979 | PSENEN | 12279 | USP24 |
| 2380 | CPT2 | 5680 | KLF10 | 8980 | PSG1 | 12280 | USP25 |
| 2381 | CPTP | 5681 | KLF11 | 8981 | PSG11 | 12281 | USP27X |
| 2382 | CPVL | 5682 | KLF13 | 8982 | PSG2 | 12282 | USP28 |
| 2383 | CPZ | 5683 | KLF14 | 8983 | PSG7 | 12283 | USP29 |
| 2384 | CR1 | 5684 | KLF15 | 8984 | PSIP1 | 12284 | USP30 |
| 2385 | CR1L | 5685 | KLF16 | 8985 | PSMA1 | 12285 | USP31 |
| 2386 | CR2 | 5686 | KLF2 | 8986 | PSMA2 | 12286 | USP32 |
| 2387 | CRABP1 | 5687 | KLF3 | 8987 | PSMA3 | 12287 | USP33 |
| 2388 | CRABP2 | 5688 | KLF3-AS1 | 8988 | PSMA4 | 12288 | USP34 |
| 2389 | CRACD | 5689 | KLF4 | 8989 | PSMA5 | 12289 | USP35 |
| 2390 | CRADD | 5690 | KLF5 | 8990 | PSMA6 | 12290 | USP36 |
| 2391 | CRAMP1 | 5691 | KLF6 | 8991 | PSMA7 | 12291 | USP37 |
| 2392 | CRAT | 5692 | KLF7 | 8992 | PSMA8 | 12292 | USP39 |
| 2393 | CRB1 | 5693 | KLF8 | 8993 | PSMB1 | 12293 | USP4 |
| 2394 | CRB2 | 5694 | KLF9 | 8994 | PSMB10 | 12294 | USP40 |
| 2395 | CRBN | 5695 | KLHDC1 | 8995 | PSMB11 | 12295 | USP42 |
| 2396 | CREB1 | 5696 | KLHDC4 | 8996 | PSMB2 | 12296 | USP43 |
| 2397 | CREB3 | 5697 | KLHL12 | 8997 | PSMB3 | 12297 | USP44 |
| 2398 | CREB3L1 | 5698 | KLHL13 | 8998 | PSMB4 | 12298 | USP45 |
| 2399 | CREB3L2 | 5699 | KLHL14 | 8999 | PSMB5 | 12299 | USP47 |
| 2400 | CREB3L3 | 5700 | KLHL15 | 9000 | PSMB6 | 12300 | USP48 |
| 2401 | CREB3L4 | 5701 | KLHL17 | 9001 | PSMB7 | 12301 | USP49 |
| 2402 | CREB5 | 5702 | KLHL2 | 9002 | PSMB8 | 12302 | USP5 |
| 2403 | CREBBP | 5703 | KLHL20 | 9003 | PSMB9 | 12303 | USP53 |
| 2404 | CREBZF | 5704 | KLHL22 | 9004 | PSMC1 | 12304 | USP6 |
| 2405 | CREG1 | 5705 | KLHL23 | 9005 | PSMC2 | 12305 | USP6NL |
| 2406 | CRELD1 | 5706 | KLHL42 | 9006 | PSMC3 | 12306 | USP7 |
| 2407 | CREM | 5707 | KLHL6 | 9007 | PSMC4 | 12307 | USP8 |
| 2408 | CRH | 5708 | KLHL8 | 9008 | PSMC5 | 12308 | USP9X |
| 2409 | CRHBP | 5709 | KLHL9 | 9009 | PSMC6 | 12309 | USP9Y |
| 2410 | CRHR1 | 5710 | KLK1 | 9010 | PSMD1 | 12310 | USPL1 |
| 2411 | CRHR2 | 5711 | KLK10 | 9011 | PSMD10 | 12311 | UTP14A |
| 2412 | CRIP1 | 5712 | KLK11 | 9012 | PSMD11 | 12312 | UTP15 |
| 2413 | CRIP2 | 5713 | KLK15 | 9013 | PSMD12 | 12313 | UTP18 |
| 2414 | CRISP3 | 5714 | KLK2 | 9014 | PSMD13 | 12314 | UTP20 |
| 2415 | CRK | 5715 | KLK3 | 9015 | PSMD14 | 12315 | UTP4 |
| 2416 | CRKL | 5716 | KLK4 | 9016 | PSMD2 | 12316 | UTP6 |
| 2417 | CRLF1 | 5717 | KLK5 | 9017 | PSMD3 | 12317 | UTRN |
| 2418 | CRLF2 | 5718 | KLK6 | 9018 | PSMD4 | 12318 | UTS2 |
| 2419 | CRLF3 | 5719 | KLK7 | 9019 | PSMD5 | 12319 | UTS2B |
| 2420 | CRLS1 | 5720 | KLK8 | 9020 | PSMD6 | 12320 | UTS2R |
| 2421 | CRMP1 | 5721 | KLK9 | 9021 | PSMD7 | 12321 | UTY |
| 2422 | CRNDE | 5722 | KLKB1 | 9022 | PSMD8 | 12322 | UVRAG |
| 2423 | CRNKL1 | 5723 | KLLN | 9023 | PSMD9 | 12323 | UVSSA |
| 2424 | CROCC | 5724 | KLRA1P | 9024 | PSME1 | 12324 | UXT |
| 2425 | CROT | 5725 | KLRB1 | 9025 | PSME2 | 12325 | VAC14 |
| 2426 | CRP | 5726 | KLRC1 | 9026 | PSME3 | 12326 | VAMP1 |
| 2427 | CRTAC1 | 5727 | KLRC2 | 9027 | PSME4 | 12327 | VAMP2 |
| 2428 | CRTAP | 5728 | KLRD1 | 9028 | PSMF1 | 12328 | VAMP3 |
| 2429 | CRTC1 | 5729 | KLRF1 | 9029 | PSMG1 | 12329 | VAMP4 |
| 2430 | CRTC2 | 5730 | KLRG1 | 9030 | PSMG2 | 12330 | VAMP5 |
| 2431 | CRTC3 | 5731 | KLRK1 | 9031 | PSMG3 | 12331 | VAMP7 |
| 2432 | CRX | 5732 | KMO | 9032 | PSORS1C1 | 12332 | VANGL1 |
| 2433 | CRY1 | 5733 | KMT2A | 9033 | PSORS1C2 | 12333 | VANGL2 |
| 2434 | CRY2 | 5734 | KMT2B | 9034 | PSORS1C3 | 12334 | VAPA |
| 2435 | CRYAA | 5735 | KMT2C | 9035 | PSPC1 | 12335 | VAPB |
| 2436 | CRYAA2 | 5736 | KMT2D | 9036 | PSPH | 12336 | VARS1 |
| 2437 | CRYAB | 5737 | KMT2E | 9037 | PSPN | 12337 | VARS2 |
| 2438 | CRYBA1 | 5738 | KMT5A | 9038 | PSRC1 | 12338 | VASH1 |
| 2439 | CRYBA4 | 5739 | KMT5B | 9039 | PSTPIP1 | 12339 | VASN |
| 2440 | CRYBB1 | 5740 | KMT5C | 9040 | PSTPIP2 | 12340 | VASP |
| 2441 | CRYBB2 | 5741 | KNG1 | 9041 | PTAFR | 12341 | VAT1 |
| 2442 | CRYBB3 | 5742 | KNL1 | 9042 | PTBP1 | 12342 | VAV1 |
| 2443 | CRYBG2 | 5743 | KNOP1 | 9043 | PTBP2 | 12343 | VAV2 |
| 2444 | CRYGB | 5744 | KNSTRN | 9044 | PTBP3 | 12344 | VAV3 |
| 2445 | CRYGC | 5745 | KNTC1 | 9045 | PTCD1 | 12345 | VAX1 |
| 2446 | CRYGD | 5746 | KPNA1 | 9046 | PTCD2 | 12346 | VBP1 |
| 2447 | CRYGS | 5747 | KPNA2 | 9047 | PTCD3 | 12347 | VCAM1 |
| 2448 | CRYL1 | 5748 | KPNA3 | 9048 | PTCH1 | 12348 | VCAN |
| 2449 | CRYM | 5749 | KPNA4 | 9049 | PTCH2 | 12349 | VCL |
| 2450 | CRYZ | 5750 | KPNA5 | 9050 | PTCHD1 | 12350 | VCP |
| 2451 | CRYZL1 | 5751 | KPNA6 | 9051 | PTCRA | 12351 | VCPIP1 |
| 2452 | CS | 5752 | KPNB1 | 9052 | PTDSS1 | 12352 | VCPKMT |
| 2453 | CSAD | 5753 | KPTN | 9053 | PTDSS2 | 12353 | VDAC1 |
| 2454 | CSDE1 | 5754 | KRAS | 9054 | PTEN | 12354 | VDAC2 |
| 2455 | CSE1L | 5755 | KRBOX4 | 9055 | PTENP1 | 12355 | VDAC3 |
| 2456 | CSF1 | 5756 | KRCC1 | 9056 | PTER | 12356 | VDR |
| 2457 | CSF1R | 5757 | KREMEN1 | 9057 | PTF1A | 12357 | VEGFA |
| 2458 | CSF2 | 5758 | KRI1 | 9058 | PTGDR2 | 12358 | VEGFB |
| 2459 | CSF2RA | 5759 | KRIT1 | 9059 | PTGDS | 12359 | VEGFC |
| 2460 | CSF3 | 5760 | KRT1 | 9060 | PTGER1 | 12360 | VEGFD |
| 2461 | CSF3R | 5761 | KRT10 | 9061 | PTGER2 | 12361 | VEZF1 |
| 2462 | CSH1 | 5762 | KRT12 | 9062 | PTGER3 | 12362 | VGLL4 |
| 2463 | CSH2 | 5763 | KRT13 | 9063 | PTGER4 | 12363 | VHL |
| 2464 | CSK | 5764 | KRT14 | 9064 | PTGES | 12364 | VHLL |
| 2465 | CSMD1 | 5765 | KRT15 | 9065 | PTGES2 | 12365 | VIL1 |
| 2466 | CSMD3 | 5766 | KRT16 | 9066 | PTGES3 | 12366 | VILL |
| 2467 | CSN1S1 | 5767 | KRT17 | 9067 | PTGFR | 12367 | VIM |
| 2468 | CSN2 | 5768 | KRT18 | 9068 | PTGFRN | 12368 | VIP |
| 2469 | CSN3 | 5769 | KRT19 | 9069 | PTGIR | 12369 | VIPAS39 |
| 2470 | CSNK1A1 | 5770 | KRT2 | 9070 | PTGIS | 12370 | VIPR1 |
| 2471 | CSNK1A1L | 5771 | KRT20 | 9071 | PTGR1 | 12371 | VIPR2 |
| 2472 | CSNK1D | 5772 | KRT23 | 9072 | PTGR2 | 12372 | VIRMA |
| 2473 | CSNK1E | 5773 | KRT24 | 9073 | PTGS1 | 12373 | VKORC1 |
| 2474 | CSNK1G1 | 5774 | KRT3 | 9074 | PTGS2 | 12374 | VKORC1L1 |
| 2475 | CSNK1G3 | 5775 | KRT37 | 9075 | PTH | 12375 | VLDLR |
| 2476 | CSNK2A1 | 5776 | KRT39 | 9076 | PTH1R | 12376 | VMA21 |
| 2477 | CSNK2A2 | 5777 | KRT4 | 9077 | PTH2R | 12377 | VMP1 |
| 2478 | CSNK2A3 | 5778 | KRT40 | 9078 | PTHLH | 12378 | VNN1 |
| 2479 | CSNK2B | 5779 | KRT5 | 9079 | PTK2 | 12379 | VNN2 |
| 2480 | CSPG4 | 5780 | KRT6A | 9080 | PTK2B | 12380 | VNN3 |
| 2481 | CSPG5 | 5781 | KRT6B | 9081 | PTK6 | 12381 | VPS11 |
| 2482 | CSPP1 | 5782 | KRT7 | 9082 | PTK7 | 12382 | VPS13A |
| 2483 | CSRNP1 | 5783 | KRT73 | 9083 | PTMA | 12383 | VPS13B |
| 2484 | CSRNP2 | 5784 | KRT75 | 9084 | PTMS | 12384 | VPS13C |
| 2485 | CSRP1 | 5785 | KRT76 | 9085 | PTN | 12385 | VPS13D |
| 2486 | CSRP2 | 5786 | KRT78 | 9086 | PTOV1 | 12386 | VPS16 |
| 2487 | CSRP3 | 5787 | KRT8 | 9087 | PTOV1-AS2 | 12387 | VPS18 |
| 2488 | CST1 | 5788 | KRT80 | 9088 | PTP4A1 | 12388 | VPS25 |
| 2489 | CST3 | 5789 | KRT81 | 9089 | PTP4A2 | 12389 | VPS26A |
| 2490 | CST5 | 5790 | KRT86 | 9090 | PTP4A3 | 12390 | VPS26B |
| 2491 | CST6 | 5791 | KRT9 | 9091 | PTPA | 12391 | VPS26C |
| 2492 | CSTA | 5792 | KRTAP11-1 | 9092 | PTPMT1 | 12392 | VPS28 |
| 2493 | CSTB | 5793 | KRTAP3-2 | 9093 | PTPN1 | 12393 | VPS29 |
| 2494 | CSTF2 | 5794 | KRTAP3-3 | 9094 | PTPN11 | 12394 | VPS33A |
| 2495 | CSTF3 | 5795 | KRTAP5-5 | 9095 | PTPN12 | 12395 | VPS33B |
| 2496 | CTAG1A | 5796 | KRTAP5-6 | 9096 | PTPN13 | 12396 | VPS35 |
| 2497 | CTAG1B | 5797 | KRTCAP2 | 9097 | PTPN14 | 12397 | VPS37A |
| 2498 | CTAG2 | 5798 | KSR1 | 9098 | PTPN2 | 12398 | VPS41 |
| 2499 | CTBP1 | 5799 | KTN1 | 9099 | PTPN22 | 12399 | VPS45 |
| 2500 | CTBP1-AS | 5800 | KXD1 | 9100 | PTPN23 | 12400 | VPS4A |
| 2501 | CTBP2 | 5801 | KYAT1 | 9101 | PTPN3 | 12401 | VPS4B |
| 2502 | CTC1 | 5802 | KYNU | 9102 | PTPN4 | 12402 | VPS50 |
| 2503 | CTCF | 5803 | L13713-141 | 9103 | PTPN5 | 12403 | VPS51 |
| 2504 | CTCFL | 5804 | L13714-130 | 9104 | PTPN6 | 12404 | VPS52 |
| 2505 | CTDP1 | 5805 | L1CAM | 9105 | PTPN9 | 12405 | VPS53 |
| 2506 | CTDSP1 | 5806 | L2HGDH | 9106 | PTPRA | 12406 | VPS54 |
| 2507 | CTDSPL | 5807 | L3MBTL1 | 9107 | PTPRB | 12407 | VPS72 |
| 2508 | CTDSPL2 | 5808 | L3MBTL2 | 9108 | PTPRC | 12408 | VPS8 |
| 2509 | CTF1 | 5809 | L3MBTL3 | 9109 | PTPRD | 12409 | VRK1 |
| 2510 | CTH | 5810 | LACC1 | 9110 | PTPRF | 12410 | VRK2 |
| 2511 | CTHRC1 | 5811 | LACTB | 9111 | PTPRG | 12411 | VRK3 |
| 2512 | CTIF | 5812 | LAD1 | 9112 | PTPRJ | 12412 | VSIG4 |
| 2513 | CTLA4 | 5813 | LAG3 | 9113 | PTPRK | 12413 | VSIR |
| 2514 | CTNNA1 | 5814 | LAGE3 | 9114 | PTPRM | 12414 | VSNL1 |
| 2515 | CTNNA2 | 5815 | LAIR1 | 9115 | PTPRN | 12415 | VSTM4 |
| 2516 | CTNNA3 | 5816 | LALBA | 9116 | PTPRN2 | 12416 | VSX1 |
| 2517 | CTNNAL1 | 5817 | LAMA1 | 9117 | PTPRO | 12417 | VSX2 |
| 2518 | CTNNB1 | 5818 | LAMA2 | 9118 | PTPRR | 12418 | VTCN1 |
| 2519 | CTNNBIP1 | 5819 | LAMA3 | 9119 | PTPRS | 12419 | VTI1A |
| 2520 | CTNNBL1 | 5820 | LAMA4 | 9120 | PTPRT | 12420 | VTI1B |
| 2521 | CTNND1 | 5821 | LAMA5 | 9121 | PTPRU | 12421 | VTN |
| 2522 | CTNND2 | 5822 | LAMA5-AS1 | 9122 | PTPRZ1 | 12422 | VTRNA2-1 |
| 2523 | CTNS | 5823 | LAMB1 | 9123 | PTRH1 | 12423 | VWA1 |
| 2524 | CTPS1 | 5824 | LAMB2 | 9124 | PTRH2 | 12424 | VWA8 |
| 2525 | CTPS2 | 5825 | LAMB3 | 9125 | PTRHD1 | 12425 | VWF |
| 2526 | CTR9 | 5826 | LAMC1 | 9126 | PTS | 12426 | WAC |
| 2527 | CTRC | 5827 | LAMC2 | 9127 | PTTG1 | 12427 | WAPL |
| 2528 | CTRL | 5828 | LAMP1 | 9128 | PTTG1IP | 12428 | WARS1 |
| 2529 | CTSA | 5829 | LAMP2 | 9129 | PTX3 | 12429 | WARS2 |
| 2530 | CTSB | 5830 | LAMP5 | 9130 | PUF60 | 12430 | WARS2-IT1 |
| 2531 | CTSC | 5831 | LAMTOR1 | 9131 | PUM1 | 12431 | WAS |
| 2532 | CTSD | 5832 | LAMTOR5 | 9132 | PUM2 | 12432 | WASF1 |
| 2533 | CTSE | 5833 | LANCL1 | 9133 | PUM3 | 12433 | WASF2 |
| 2534 | CTSF | 5834 | LANCL2 | 9134 | PURA | 12434 | WASF3 |
| 2535 | CTSG | 5835 | LAP3 | 9135 | PURB | 12435 | WASH6P |
| 2536 | CTSH | 5836 | LAPTM4A | 9136 | PURPL | 12436 | WASHC2A |
| 2537 | CTSK | 5837 | LAPTM4B | 9137 | PUS1 | 12437 | WASHC2C |
| 2538 | CTSL | 5838 | LAPTM5 | 9138 | PUS10 | 12438 | WASHC3 |
| 2539 | CTSS | 5839 | LARGE1 | 9139 | PUS3 | 12439 | WASHC4 |
| 2540 | CTSV | 5840 | LARP1 | 9140 | PUS7 | 12440 | WASHC5 |
| 2541 | CTSZ | 5841 | LARP1B | 9141 | PVALB | 12441 | WASL |
| 2542 | CTTN | 5842 | LARP4 | 9142 | PVR | 12442 | WBP11 |
| 2543 | CTTNBP2 | 5843 | LARP4B | 9143 | PVT1 | 12443 | WBP1L |
| 2544 | CTTNBP2NL | 5844 | LARP6 | 9144 | PWAR1 | 12444 | WBP2 |
| 2545 | CTU1 | 5845 | LARP7 | 9145 | PWP1 | 12445 | WBP4 |
| 2546 | CTU2 | 5846 | LARS1 | 9146 | PWP2 | 12446 | WDCP |
| 2547 | CUBN | 5847 | LARS2 | 9147 | PWWP2A | 12447 | WDFY1 |
| 2548 | CUEDC1 | 5848 | LAS1L | 9148 | PWWP3A | 12448 | WDFY3 |
| 2549 | CUEDC2 | 5849 | LASP1 | 9149 | PXDN | 12449 | WDFY4 |
| 2550 | CUL1 | 5850 | LAT | 9150 | PXDNL | 12450 | WDHD1 |
| 2551 | CUL2 | 5851 | LATS1 | 9151 | PXMP2 | 12451 | WDPCP |
| 2552 | CUL3 | 5852 | LATS2 | 9152 | PXMP4 | 12452 | WDR1 |
| 2553 | CUL4A | 5853 | LAX1 | 9153 | PXN | 12453 | WDR11 |
| 2554 | CUL4B | 5854 | LBH | 9154 | PYCARD | 12454 | WDR12 |
| 2555 | CUL5 | 5855 | LBP | 9155 | PYCR1 | 12455 | WDR19 |
| 2556 | CUL7 | 5856 | LBR | 9156 | PYCR2 | 12456 | WDR20 |
| 2557 | CUL9 | 5857 | LBX1 | 9157 | PYCR3 | 12457 | WDR24 |
| 2558 | CUTC | 5858 | LCA5 | 9158 | PYDC1 | 12458 | WDR26 |
| 2559 | CUX1 | 5859 | LCAT | 9159 | PYGB | 12459 | WDR27 |
| 2560 | CUX2 | 5860 | LCK | 9160 | PYGL | 12460 | WDR3 |
| 2561 | CWC22 | 5861 | LCLAT1 | 9161 | PYGM | 12461 | WDR33 |
| 2562 | CWC25 | 5862 | LCN1 | 9162 | PYGO2 | 12462 | WDR35 |
| 2563 | CWF19L1 | 5863 | LCN2 | 9163 | PYHIN1 | 12463 | WDR36 |
| 2564 | CWF19L2 | 5864 | LCOR | 9164 | PYM1 | 12464 | WDR37 |
| 2565 | CX3CL1 | 5865 | LCP1 | 9165 | PYROXD2 | 12465 | WDR4 |
| 2566 | CX3CR1 | 5866 | LCP2 | 9166 | PYY | 12466 | WDR41 |
| 2567 | CXADR | 5867 | LCT | 9167 | PZP | 12467 | WDR43 |
| 2568 | CXCL1 | 5868 | LDB1 | 9168 | QARS1 | 12468 | WDR44 |
| 2569 | CXCL10 | 5869 | LDB2 | 9169 | QDPR | 12469 | WDR45 |
| 2570 | CXCL11 | 5870 | LDHA | 9170 | QKI | 12470 | WDR45B |
| 2571 | CXCL12 | 5871 | LDHAL6A | 9171 | QPCTL | 12471 | WDR46 |
| 2572 | CXCL13 | 5872 | LDHAL6B | 9172 | QPRT | 12472 | WDR48 |
| 2573 | CXCL14 | 5873 | LDHB | 9173 | QRICH1 | 12473 | WDR5 |
| 2574 | CXCL16 | 5874 | LDHC | 9174 | QSER1 | 12474 | WDR59 |
| 2575 | CXCL17 | 5875 | LDHD | 9175 | QSOX1 | 12475 | WDR5B |
| 2576 | CXCL2 | 5876 | LDLR | 9176 | QSOX2 | 12476 | WDR6 |
| 2577 | CXCL3 | 5877 | LDLRAD1 | 9177 | R3HCC1L | 12477 | WDR61 |
| 2578 | CXCL5 | 5878 | LDLRAP1 | 9178 | R3HDM2 | 12478 | WDR62 |
| 2579 | CXCL6 | 5879 | LDOC1 | 9179 | R3HDML | 12479 | WDR7 |
| 2580 | CXCL8 | 5880 | LECT2 | 9180 | RAB10 | 12480 | WDR70 |
| 2581 | CXCL9 | 5881 | LEF1 | 9181 | RAB11A | 12481 | WDR72 |
| 2582 | CXCR1 | 5882 | LEFTY1 | 9182 | RAB11B | 12482 | WDR74 |
| 2583 | CXCR2 | 5883 | LEFTY2 | 9183 | RAB11FIP1 | 12483 | WDR75 |
| 2584 | CXCR2P1 | 5884 | LELP1 | 9184 | RAB11FIP5 | 12484 | WDR76 |
| 2585 | CXCR3 | 5885 | LEMD2 | 9185 | RAB13 | 12485 | WDR77 |
| 2586 | CXCR4 | 5886 | LEMD3 | 9186 | RAB14 | 12486 | WDR81 |
| 2587 | CXCR5 | 5887 | LENG1 | 9187 | RAB18 | 12487 | WDR82 |
| 2588 | CXCR6 | 5888 | LENG8 | 9188 | RAB1A | 12488 | WDR83 |
| 2589 | CXXC5 | 5889 | LENG9 | 9189 | RAB1B | 12489 | WDTC1 |
| 2590 | CYB561 | 5890 | LEO1 | 9190 | RAB21 | 12490 | WEE1 |
| 2591 | CYB561D2 | 5891 | LEP | 9191 | RAB23 | 12491 | WEE2 |
| 2592 | CYB5A | 5892 | LEPQTL1 | 9192 | RAB25 | 12492 | WFDC2 |
| 2593 | CYB5B | 5893 | LEPR | 9193 | RAB26 | 12493 | WFDC21P |
| 2594 | CYB5R1 | 5894 | LEPROT | 9194 | RAB27A | 12494 | WFIKKN2 |
| 2595 | CYB5R3 | 5895 | LETM1 | 9195 | RAB2A | 12495 | WFS1 |
| 2596 | CYB5R4 | 5896 | LETM2 | 9196 | RAB2B | 12496 | WHCR |
| 2597 | CYBA | 5897 | LFNG | 9197 | RAB30 | 12497 | WHRN |
| 2598 | CYBB | 5898 | LGALS1 | 9198 | RAB31 | 12498 | WIF1 |
| 2599 | CYBC1 | 5899 | LGALS13 | 9199 | RAB32 | 12499 | WIPF1 |
| 2600 | CYBRD1 | 5900 | LGALS2 | 9200 | RAB33B | 12500 | WIPI1 |
| 2601 | CYC1 | 5901 | LGALS3 | 9201 | RAB34 | 12501 | WIPI2 |
| 2602 | CYCS | 5902 | LGALS3BP | 9202 | RAB35 | 12502 | WIZ |
| 2603 | CYFIP1 | 5903 | LGALS4 | 9203 | RAB36 | 12503 | WLS |
| 2604 | CYFIP2 | 5904 | LGALS7 | 9204 | RAB37 | 12504 | WNK1 |
| 2605 | CYGB | 5905 | LGALS7B | 9205 | RAB38 | 12505 | WNK2 |
| 2606 | CYLC2 | 5906 | LGALS8 | 9206 | RAB39B | 12506 | WNK3 |
| 2607 | CYLD | 5907 | LGALS9 | 9207 | RAB3A | 12507 | WNK4 |
| 2608 | CYP11A1 | 5908 | LGALSL | 9208 | RAB3GAP1 | 12508 | WNT1 |
| 2609 | CYP11B1 | 5909 | LGI1 | 9209 | RAB3GAP2 | 12509 | WNT10A |
| 2610 | CYP11B2 | 5910 | LGI2 | 9210 | RAB3IL1 | 12510 | WNT10B |
| 2611 | CYP17A1 | 5911 | LGI4 | 9211 | RAB3IP | 12511 | WNT11 |
| 2612 | CYP19A1 | 5912 | LGMN | 9212 | RAB40AL | 12512 | WNT16 |
| 2613 | CYP1A1 | 5913 | LGMNP1 | 9213 | RAB43 | 12513 | WNT2 |
| 2614 | CYP1A2 | 5914 | LGR4 | 9214 | RAB5A | 12514 | WNT2B |
| 2615 | CYP1B1 | 5915 | LGR5 | 9215 | RAB5B | 12515 | WNT3 |
| 2616 | CYP20A1 | 5916 | LGR6 | 9216 | RAB5C | 12516 | WNT3A |
| 2617 | CYP21A1P | 5917 | LHCGR | 9217 | RAB6A | 12517 | WNT4 |
| 2618 | CYP21A2 | 5918 | LHX1 | 9218 | RAB6C | 12518 | WNT5A |
| 2619 | CYP24A1 | 5919 | LHX2 | 9219 | RAB7A | 12519 | WNT5B |
| 2620 | CYP26A1 | 5920 | LHX3 | 9220 | RAB7B | 12520 | WNT6 |
| 2621 | CYP26B1 | 5921 | LHX4 | 9221 | RAB8A | 12521 | WNT7A |
| 2622 | CYP27A1 | 5922 | LHX4-AS1 | 9222 | RAB8B | 12522 | WNT7B |
| 2623 | CYP27B1 | 5923 | LIAS | 9223 | RAB9A | 12523 | WNT8A |
| 2624 | CYP27C1 | 5924 | LIF | 9224 | RABAC1 | 12524 | WNT9A |
| 2625 | CYP2A13 | 5925 | LIFR | 9225 | RABEP1 | 12525 | WNT9B |
| 2626 | CYP2A6 | 5926 | LIG1 | 9226 | RABEP2 | 12526 | WRAP53 |
| 2627 | CYP2B6 | 5927 | LIG3 | 9227 | RABGAP1L | 12527 | WRAP73 |
| 2628 | CYP2C18 | 5928 | LIG4 | 9228 | RABGEF1 | 12528 | WRN |
| 2629 | CYP2C19 | 5929 | LILRA2 | 9229 | RABGGTB | 12529 | WRNIP1 |
| 2630 | CYP2C8 | 5930 | LILRA3 | 9230 | RABL6 | 12530 | WSB1 |
| 2631 | CYP2C9 | 5931 | LILRB1 | 9231 | RAC1 | 12531 | WT1 |
| 2632 | CYP2D6 | 5932 | LILRB2 | 9232 | RAC2 | 12532 | WTAP |
| 2633 | CYP2E1 | 5933 | LILRB3 | 9233 | RAC3 | 12533 | WTIP |
| 2634 | CYP2F1 | 5934 | LILRB4 | 9234 | RACGAP1 | 12534 | WWC1 |
| 2635 | CYP2J2 | 5935 | LIM2 | 9235 | RACK1 | 12535 | WWC2 |
| 2636 | CYP2R1 | 5936 | LIMA1 | 9236 | RAD17 | 12536 | WWOX |
| 2637 | CYP2S1 | 5937 | LIMCH1 | 9237 | RAD18 | 12537 | WWP1 |
| 2638 | CYP2U1 | 5938 | LIMD1 | 9238 | RAD21 | 12538 | WWP2 |
| 2639 | CYP3A4 | 5939 | LIMK1 | 9239 | RAD23A | 12539 | WWTR1 |
| 2640 | CYP3A5 | 5940 | LIMK2 | 9240 | RAD23B | 12540 | XAB2 |
| 2641 | CYP3A7 | 5941 | LIMS1 | 9241 | RAD50 | 12541 | XAF1 |
| 2642 | CYP46A1 | 5942 | LIMS2 | 9242 | RAD51 | 12542 | XAGE1A |
| 2643 | CYP4A11 | 5943 | LIN28A | 9243 | RAD51AP1 | 12543 | XAGE1B |
| 2644 | CYP4A22 | 5944 | LIN28B | 9244 | RAD51-AS1 | 12544 | XAGE3 |
| 2645 | CYP4B1 | 5945 | LIN52 | 9245 | RAD51B | 12545 | XBP1 |
| 2646 | CYP4F11 | 5946 | LIN54 | 9246 | RAD51C | 12546 | XCL1 |
| 2647 | CYP4F12 | 5947 | LIN7A | 9247 | RAD51D | 12547 | XDH |
| 2648 | CYP4F2 | 5948 | LIN7C | 9248 | RAD52 | 12548 | XIAP |
| 2649 | CYP4F3 | 5949 | LIN9 | 9249 | RAD54B | 12549 | XIRP1 |
| 2650 | CYP4F8 | 5950 | LINP1 | 9250 | RAD54L | 12550 | XIRP2 |
| 2651 | CYP4V2 | 5951 | LINS1 | 9251 | RAD9A | 12551 | XIST |
| 2652 | CYP4X1 | 5952 | LIPA | 9252 | RADIL | 12552 | XK |
| 2653 | CYP4Z1 | 5953 | LIPC | 9253 | RADX | 12553 | XLOC_007697 |
| 2654 | CYP51A1 | 5954 | LIPE | 9254 | RAE1 | 12554 | XLOC_008559 |
| 2655 | CYP7A1 | 5955 | LIPF | 9255 | RAET1E | 12555 | XLOC_009911 |
| 2656 | CYP7B1 | 5956 | LIPG | 9256 | RAF1 | 12556 | XPA |
| 2657 | CYP8B1 | 5957 | LIPI | 9257 | RAG1 | 12557 | XPC |
| 2658 | CYREN | 5958 | LIPT1 | 9258 | RAG2 | 12558 | XPNPEP1 |
| 2659 | CYRIB | 5959 | LITAF | 9259 | RAI1 | 12559 | XPNPEP2 |
| 2660 | CYS1 | 5960 | LIVAR | 9260 | RAI14 | 12560 | XPNPEP3 |
| 2661 | CYSLTR1 | 5961 | LLGL1 | 9261 | RAI2 | 12561 | XPO1 |
| 2662 | CYSLTR2 | 5962 | LLGL2 | 9262 | RALA | 12562 | XPO4 |
| 2663 | CYTH1 | 5963 | LLPH | 9263 | RALBP1 | 12563 | XPO5 |
| 2664 | CYTH2 | 5964 | LMAN1 | 9264 | RALGAPA1 | 12564 | XPO7 |
| 2665 | CYTOR | 5965 | LMAN2 | 9265 | RALGDS | 12565 | XPOT |
| 2666 | D2HGDH | 5966 | LMAN2L | 9266 | RALGPS2 | 12566 | XPR1 |
| 2667 | DAAM1 | 5967 | LMBRD1 | 9267 | RALY | 12567 | XRCC1 |
| 2668 | DAAM2 | 5968 | LMCD1 | 9268 | RAMAC | 12568 | XRCC2 |
| 2669 | DAB1 | 5969 | LMCD1-AS1 | 9269 | RAMP1 | 12569 | XRCC3 |
| 2670 | DAB2 | 5970 | LMF1 | 9270 | RAMP2 | 12570 | XRCC4 |
| 2671 | DAB2IP | 5971 | LMLN | 9271 | RAN | 12571 | XRCC5 |
| 2672 | DACH1 | 5972 | LMNA | 9272 | RANBP1 | 12572 | XRCC6 |
| 2673 | DACT1 | 5973 | LMNB1 | 9273 | RANBP17 | 12573 | XRN1 |
| 2674 | DACT3 | 5974 | LMNB2 | 9274 | RANBP2 | 12574 | XRN2 |
| 2675 | DAD1 | 5975 | LMNTD1 | 9275 | RANBP3 | 12575 | XYLT1 |
| 2676 | DAG1 | 5976 | LMO1 | 9276 | RANBP6 | 12576 | XYLT2 |
| 2677 | DAGLA | 5977 | LMO2 | 9277 | RANBP9 | 12577 | YAE1 |
| 2678 | DAGLB | 5978 | LMO4 | 9278 | RANGAP1 | 12578 | YAP1 |
| 2679 | DALIR | 5979 | LMO7 | 9279 | RAP1A | 12579 | YARS1 |
| 2680 | DALRD3 | 5980 | LMOD1 | 9280 | RAP1B | 12580 | YARS2 |
| 2681 | DANCR | 5981 | LMOD2 | 9281 | RAP1GAP | 12581 | YBX1 |
| 2682 | DAND5 | 5982 | LMOD3 | 9282 | RAP1GAP2 | 12582 | YBX2 |
| 2683 | DAO | 5983 | LMTK2 | 9283 | RAP2A | 12583 | YBX3 |
| 2684 | DAP | 5984 | LMTK3 | 9284 | RAP2B | 12584 | YEATS2 |
| 2685 | DAP3 | 5985 | LMX1A | 9285 | RAP2C | 12585 | YEATS4 |
| 2686 | DAPK1 | 5986 | lnc-ADIPOQ-2 | 9286 | RAPGEF1 | 12586 | YES1 |
| 2687 | DAPK2 | 5987 | lnc-ADIPOQ-3 | 9287 | RAPGEF2 | 12587 | YIF1A |
| 2688 | DAPK3 | 5988 | LNCARSR | 9288 | RAPGEF3 | 12588 | YIF1B |
| 2689 | DARS1 | 5989 | lnc-ATP6V1G2-DDX39B-3 | 9289 | RAPGEF4 | 12589 | YIPF1 |
| 2690 | DARS2 | 5990 | lnc-BRINP1-3 | 9290 | RAPGEF6 | 12590 | YIPF3 |
| 2691 | DAW1 | 5991 | lnc-CCDC89-4 | 9291 | RAPH1 | 12591 | YIPF5 |
| 2692 | DAXX | 5992 | lnc-CCDC89-6 | 9292 | RAPSN | 12592 | YJU2 |
| 2693 | DAZAP1 | 5993 | lnc-HLA-A-2 | 9293 | RARA | 12593 | YKT6 |
| 2694 | DAZAP2 | 5994 | lnc-HLA-DQA1-8 | 9294 | RARB | 12594 | YLPM1 |
| 2695 | DBH | 5995 | lnc-HLA-DRB1-6 | 9295 | RARG | 12595 | YME1L1 |
| 2696 | DBH-AS1 | 5996 | lnc-PUM2-3 | 9296 | RARRES1 | 12596 | YOD1 |
| 2697 | DBI | 5997 | lnc-RHOB-11 | 9297 | RARRES2 | 12597 | YPEL2 |
| 2698 | DBN1 | 5998 | lnc-RNF39-8 | 9298 | RARS1 | 12598 | YRDC |
| 2699 | DBNL | 5999 | lnc-SHANK1-2 | 9299 | RARS2 | 12599 | YTHDC1 |
| 2700 | DBP | 6000 | lnc-SHANK1-3 | 9300 | RASA1 | 12600 | YTHDC2 |
| 2701 | DBR1 | 6001 | lnc-TPD52-3 | 9301 | RASA2 | 12601 | YTHDF1 |
| 2702 | DBT | 6002 | lnc-ZBTB10-6 | 9302 | RASAL1 | 12602 | YTHDF2 |
| 2703 | DCAF1 | 6003 | LNPEP | 9303 | RASAL2 | 12603 | YTHDF3 |
| 2704 | DCAF10 | 6004 | LNPK | 9304 | RASAL3 | 12604 | YWHAB |
| 2705 | DCAF11 | 6005 | LNX1 | 9305 | RASD1 | 12605 | YWHAE |
| 2706 | DCAF12 | 6006 | LNX2 | 9306 | RASGEF1B | 12606 | YWHAEP7 |
| 2707 | DCAF13 | 6007 | LONP1 | 9307 | RASGEF1C | 12607 | YWHAG |
| 2708 | DCAF15 | 6008 | LONP2 | 9308 | RASGRF1 | 12608 | YWHAH |
| 2709 | DCAF17 | 6009 | LORICRIN | 9309 | RASGRF2 | 12609 | YWHAQ |
| 2710 | DCAF4 | 6010 | LOX | 9310 | RASGRP1 | 12610 | YWHAZ |
| 2711 | DCAF5 | 6011 | LOXL1 | 9311 | RASGRP2 | 12611 | YY1 |
| 2712 | DCAF6 | 6012 | LOXL2 | 9312 | RASGRP3 | 12612 | YY1AP1 |
| 2713 | DCAF7 | 6013 | LOXL4 | 9313 | RASGRP4 | 12613 | YY2 |
| 2714 | DCAF8 | 6014 | LPA | 9314 | RASIP1 | 12614 | ZACN |
| 2715 | DCAKD | 6015 | LPAR1 | 9315 | RASL10B | 12615 | ZADH2 |
| 2716 | DCANP1 | 6016 | LPAR2 | 9316 | RASSF1 | 12616 | ZAP70 |
| 2717 | DCBLD1 | 6017 | LPAR3 | 9317 | RASSF10 | 12617 | ZBBX |
| 2718 | DCBLD2 | 6018 | LPAR5 | 9318 | RASSF2 | 12618 | ZBED1 |
| 2719 | DCD | 6019 | LPCAT1 | 9319 | RASSF5 | 12619 | ZBED5 |
| 2720 | DCDC2 | 6020 | LPCAT3 | 9320 | RASSF6 | 12620 | ZBP1 |
| 2721 | DCDC2B | 6021 | LPGAT1 | 9321 | RASSF7 | 12621 | ZBTB1 |
| 2722 | DCHS1 | 6022 | LPIN1 | 9322 | RAVER1 | 12622 | ZBTB10 |
| 2723 | DCHS2 | 6023 | LPIN2 | 9323 | RAVER2 | 12623 | ZBTB14 |
| 2724 | DCK | 6024 | LPL | 9324 | RAX | 12624 | ZBTB16 |
| 2725 | DCLK1 | 6025 | LPO | 9325 | RB1 | 12625 | ZBTB17 |
| 2726 | DCLK2 | 6026 | LPP | 9326 | RB1CC1 | 12626 | ZBTB18 |
| 2727 | DCLK3 | 6027 | LPRS | 9327 | RBAK | 12627 | ZBTB2 |
| 2728 | DCLRE1A | 6028 | LPRS6 | 9328 | RBBP4 | 12628 | ZBTB20 |
| 2729 | DCLRE1B | 6029 | LPXN | 9329 | RBBP5 | 12629 | ZBTB21 |
| 2730 | DCLRE1C | 6030 | LRAT | 9330 | RBBP6 | 12630 | ZBTB24 |
| 2731 | DCN | 6031 | LRBA | 9331 | RBBP7 | 12631 | ZBTB25 |
| 2732 | DCP1A | 6032 | LRCH1 | 9332 | RBBP8 | 12632 | ZBTB3 |
| 2733 | DCP1B | 6033 | LRCH3 | 9333 | RBCK1 | 12633 | ZBTB32 |
| 2734 | DCP2 | 6034 | LRFN1 | 9334 | RBFOX1 | 12634 | ZBTB33 |
| 2735 | DCPS | 6035 | LRG1 | 9335 | RBFOX2 | 12635 | ZBTB4 |
| 2736 | DCST1-AS1 | 6036 | LRIF1 | 9336 | RBFOX3 | 12636 | ZBTB40 |
| 2737 | DCSTAMP | 6037 | LRIG2 | 9337 | RBIS | 12637 | ZBTB44 |
| 2738 | DCT | 6038 | LRIG3 | 9338 | RBKS | 12638 | ZBTB48 |
| 2739 | DCTD | 6039 | LRIT3 | 9339 | RBL1 | 12639 | ZBTB49 |
| 2740 | DCTN1 | 6040 | LRMDA | 9340 | RBL2 | 12640 | ZBTB5 |
| 2741 | DCTN2 | 6041 | LRP1 | 9341 | RBM10 | 12641 | ZBTB7A |
| 2742 | DCTN4 | 6042 | LRP10 | 9342 | RBM12B | 12642 | ZBTB7B |
| 2743 | DCTN6 | 6043 | LRP1-AS | 9343 | RBM14 | 12643 | ZBTB7C |
| 2744 | DCTPP1 | 6044 | LRP1B | 9344 | RBM14-RBM4 | 12644 | ZBTB8A |
| 2745 | DCUN1D5 | 6045 | LRP2 | 9345 | RBM15 | 12645 | ZBTB8OS |
| 2746 | DCX | 6046 | LRP3 | 9346 | RBM15B | 12646 | ZC3H11A |
| 2747 | DCXR | 6047 | LRP4 | 9347 | RBM17 | 12647 | ZC3H12A |
| 2748 | DDA1 | 6048 | LRP5 | 9348 | RBM18 | 12648 | ZC3H13 |
| 2749 | DDAH1 | 6049 | LRP6 | 9349 | RBM19 | 12649 | ZC3H14 |
| 2750 | DDAH2 | 6050 | LRP8 | 9350 | RBM20 | 12650 | ZC3H15 |
| 2751 | DDB1 | 6051 | LRPAP1 | 9351 | RBM24 | 12651 | ZC3H18 |
| 2752 | DDB2 | 6052 | LRPPRC | 9352 | RBM25 | 12652 | ZC3H4 |
| 2753 | DDC | 6053 | LRRC1 | 9353 | RBM26 | 12653 | ZC3H7A |
| 2754 | DDHD1 | 6054 | LRRC17 | 9354 | RBM27 | 12654 | ZC3H7B |
| 2755 | DDHD2 | 6055 | LRRC24 | 9355 | RBM28 | 12655 | ZC3H8 |
| 2756 | DDI1 | 6056 | LRRC32 | 9356 | RBM3 | 12656 | ZC3HAV1 |
| 2757 | DDI2 | 6057 | LRRC41 | 9357 | RBM33 | 12657 | ZC3HAV1L |
| 2758 | DDIAS | 6058 | LRRC42 | 9358 | RBM34 | 12658 | ZC3HC1 |
| 2759 | DDIT3 | 6059 | LRRC46 | 9359 | RBM38 | 12659 | ZC4H2 |
| 2760 | DDIT4 | 6060 | LRRC47 | 9360 | RBM39 | 12660 | ZCCHC10 |
| 2761 | DDO | 6061 | LRRC4C | 9361 | RBM4 | 12661 | ZCCHC14 |
| 2762 | DDOST | 6062 | LRRC56 | 9362 | RBM42 | 12662 | ZCCHC17 |
| 2763 | DDR1 | 6063 | LRRC59 | 9363 | RBM47 | 12663 | ZCCHC7 |
| 2764 | DDR2 | 6064 | LRRC6 | 9364 | RBM48 | 12664 | ZCCHC8 |
| 2765 | DDRGK1 | 6065 | LRRC7 | 9365 | RBM4B | 12665 | ZCCHC9 |
| 2766 | DDT | 6066 | LRRC74B | 9366 | RBM5 | 12666 | ZCRB1 |
| 2767 | DDX1 | 6067 | LRRC8A | 9367 | RBM6 | 12667 | ZDBF2 |
| 2768 | DDX11 | 6068 | LRRFIP1 | 9368 | RBM7 | 12668 | ZDHHC14 |
| 2769 | DDX17 | 6069 | LRRFIP2 | 9369 | RBM8A | 12669 | ZDHHC16 |
| 2770 | DDX18 | 6070 | LRRK1 | 9370 | RBMS1 | 12670 | ZDHHC17 |
| 2771 | DDX19B | 6071 | LRRK2 | 9371 | RBMS2 | 12671 | ZDHHC2 |
| 2772 | DDX20 | 6072 | LRSAM1 | 9372 | RBMS3 | 12672 | ZDHHC20 |
| 2773 | DDX21 | 6073 | LRTOMT | 9373 | RBMX | 12673 | ZDHHC3 |
| 2774 | DDX24 | 6074 | LRWD1 | 9374 | RBMX2 | 12674 | ZDHHC5 |
| 2775 | DDX27 | 6075 | LSG1 | 9375 | RBMXL1 | 12675 | ZDHHC8 |
| 2776 | DDX31 | 6076 | LSINCT5 | 9376 | RBMXL2 | 12676 | ZEB1 |
| 2777 | DDX39A | 6077 | LSM12 | 9377 | RBMXL3 | 12677 | ZEB1-AS1 |
| 2778 | DDX39B | 6078 | LSM14A | 9378 | RBMY1A1 | 12678 | ZEB2 |
| 2779 | DDX3X | 6079 | LSM3 | 9379 | RBP1 | 12679 | ZFAND1 |
| 2780 | DDX4 | 6080 | LSM4 | 9380 | RBP2 | 12680 | ZFAND2A |
| 2781 | DDX41 | 6081 | LSM7 | 9381 | RBP3 | 12681 | ZFAND4 |
| 2782 | DDX42 | 6082 | LSM8 | 9382 | RBP4 | 12682 | ZFAND5 |
| 2783 | DDX46 | 6083 | LSP1 | 9383 | RBPJ | 12683 | ZFAND6 |
| 2784 | DDX47 | 6084 | LSR | 9384 | RBPJL | 12684 | ZFAS1 |
| 2785 | DDX49 | 6085 | LSS | 9385 | RBPMS | 12685 | ZFAT |
| 2786 | DDX5 | 6086 | LST1 | 9386 | RBX1 | 12686 | ZFC3H1 |
| 2787 | DDX50 | 6087 | LTA | 9387 | RC3H1 | 12687 | ZFHX2 |
| 2788 | DDX51 | 6088 | LTA4H | 9388 | RC3H2 | 12688 | ZFHX3 |
| 2789 | DDX52 | 6089 | LTB | 9389 | RCAN1 | 12689 | ZFHX4 |
| 2790 | DDX53 | 6090 | LTB4R | 9390 | RCAN2 | 12690 | ZFP1 |
| 2791 | DDX54 | 6091 | LTB4R2 | 9391 | RCC1 | 12691 | ZFP30 |
| 2792 | DDX55 | 6092 | LTBP1 | 9392 | RCC1L | 12692 | ZFP36 |
| 2793 | DDX56 | 6093 | LTBP2 | 9393 | RCC2 | 12693 | ZFP36L1 |
| 2794 | DDX58 | 6094 | LTBP3 | 9394 | RCE1 | 12694 | ZFP36L2 |
| 2795 | DDX59 | 6095 | LTBP4 | 9395 | RCHY1 | 12695 | ZFP42 |
| 2796 | DDX6 | 6096 | LTBR | 9396 | RCL1 | 12696 | ZFP57 |
| 2797 | DEAF1 | 6097 | LTC4S | 9397 | RCN1 | 12697 | ZFP64 |
| 2798 | DECR1 | 6098 | LTF | 9398 | RCN2 | 12698 | ZFP82 |
| 2799 | DECR2 | 6099 | LTO1 | 9399 | RCN3 | 12699 | ZFP90 |
| 2800 | DEDD | 6100 | LTV1 | 9400 | RCOR1 | 12700 | ZFP91 |
| 2801 | DEF8 | 6101 | LUC7L | 9401 | RCOR2 | 12701 | ZFPL1 |
| 2802 | DEFA1 | 6102 | LUC7L2 | 9402 | RCOR3 | 12702 | ZFPM1 |
| 2803 | DEFA1B | 6103 | LUC7L3 | 9403 | RCVRN | 12703 | ZFPM2 |
| 2804 | DEFA3 | 6104 | LUCAT1 | 9404 | RD3 | 12704 | ZFR |
| 2805 | DEFA5 | 6105 | LUM | 9405 | RD3L | 12705 | ZFYVE16 |
| 2806 | DEFB1 | 6106 | LUZP1 | 9406 | RDH11 | 12706 | ZFYVE19 |
| 2807 | DEFB103B | 6107 | LXN | 9407 | RDH12 | 12707 | ZFYVE26 |
| 2808 | DEFB4A | 6108 | LY6E | 9408 | RDH14 | 12708 | ZFYVE27 |
| 2809 | DEGS1 | 6109 | LY6G5B | 9409 | RDH5 | 12709 | ZFYVE28 |
| 2810 | DEGS2 | 6110 | LY86 | 9410 | RDX | 12710 | ZFYVE9 |
| 2811 | DEK | 6111 | LY9 | 9411 | REC8 | 12711 | ZGPAT |
| 2812 | DEL1P36 | 6112 | LY96 | 9412 | RECK | 12712 | ZGRF1 |
| 2813 | DELEC1 | 6113 | LYAR | 9413 | RECQL | 12713 | ZHX1 |
| 2814 | DENND1A | 6114 | LYN | 9414 | RECQL4 | 12714 | ZHX2 |
| 2815 | DENND1B | 6115 | LYPD3 | 9415 | RECQL5 | 12715 | ZHX3 |
| 2816 | DENND2C | 6116 | LYPLA1 | 9416 | REEP1 | 12716 | ZIC1 |
| 2817 | DENND2D | 6117 | LYPLA2 | 9417 | REEP2 | 12717 | ZIC2 |
| 2818 | DENND4A | 6118 | LYPLAL1 | 9418 | REEP4 | 12718 | ZIC3 |
| 2819 | DENND4B | 6119 | LYRM4 | 9419 | REEP5 | 12719 | ZIC5 |
| 2820 | DENND4C | 6120 | LYRM7 | 9420 | REEP6 | 12720 | ZKSCAN1 |
| 2821 | DENND5A | 6121 | LYSMD2 | 9421 | REG1A | 12721 | ZKSCAN3 |
| 2822 | DENND5B | 6122 | LYST | 9422 | REG1B | 12722 | ZKSCAN4 |
| 2823 | DENR | 6123 | LYVE1 | 9423 | REG3A | 12723 | ZKSCAN8 |
| 2824 | DEPDC1B | 6124 | LYZ | 9424 | REG4 | 12724 | ZMAT1 |
| 2825 | DEPDC5 | 6125 | LZIC | 9425 | REL | 12725 | ZMAT2 |
| 2826 | DEPP1 | 6126 | LZTR1 | 9426 | RELA | 12726 | ZMAT3 |
| 2827 | DEPTOR | 6127 | LZTS1 | 9427 | RELB | 12727 | ZMIZ1 |
| 2828 | DERA | 6128 | LZTS2 | 9428 | RELCH | 12728 | ZMIZ2 |
| 2829 | DERL1 | 6129 | LZTS3 | 9429 | RELN | 12729 | ZMPSTE24 |
| 2830 | DERL2 | 6130 | M6PR | 9430 | REM1 | 12730 | ZMYM1 |
| 2831 | DERL3 | 6131 | MACF1 | 9431 | REM2 | 12731 | ZMYM2 |
| 2832 | DERPC | 6132 | MACIR | 9432 | REN | 12732 | ZMYM3 |
| 2833 | DES | 6133 | MACO1 | 9433 | RENBP | 12733 | ZMYM4 |
| 2834 | DESI2 | 6134 | MACROD1 | 9434 | REP15 | 12734 | ZMYM6 |
| 2835 | DET1 | 6135 | MACROD2 | 9435 | REPIN1 | 12735 | ZMYND10 |
| 2836 | DFFA | 6136 | MACROH2A1 | 9436 | REPS1 | 12736 | ZMYND11 |
| 2837 | DFFB | 6137 | MACROH2A2 | 9437 | REPS2 | 12737 | ZMYND19 |
| 2838 | DGAT1 | 6138 | MAD1L1 | 9438 | RER1 | 12738 | ZMYND8 |
| 2839 | DGAT2 | 6139 | MAD2L1 | 9439 | RERE | 12739 | ZNF101 |
| 2840 | DGCR2 | 6140 | MAD2L1BP | 9440 | REST | 12740 | ZNF106 |
| 2841 | DGCR8 | 6141 | MAD2L2 | 9441 | RET | 12741 | ZNF12 |
| 2842 | DGKA | 6142 | MADCAM1 | 9442 | RETN | 12742 | ZNF124 |
| 2843 | DGKB | 6143 | MADD | 9443 | RETNLB | 12743 | ZNF136 |
| 2844 | DGKD | 6144 | MAEA | 9444 | RETREG1 | 12744 | ZNF142 |
| 2845 | DGKE | 6145 | MAEL | 9445 | RETREG2 | 12745 | ZNF143 |
| 2846 | DGKG | 6146 | MAF | 9446 | RETREG3 | 12746 | ZNF146 |
| 2847 | DGKH | 6147 | MAF1 | 9447 | REV1 | 12747 | ZNF148 |
| 2848 | DGKI | 6148 | MAFA | 9448 | REV3L | 12748 | ZNF16 |
| 2849 | DGKK | 6149 | MAFB | 9449 | REXO1 | 12749 | ZNF160 |
| 2850 | DGKQ | 6150 | MAFF | 9450 | REXO2 | 12750 | ZNF169 |
| 2851 | DGKZ | 6151 | MAFG | 9451 | REXO4 | 12751 | ZNF175 |
| 2852 | DGUOK | 6152 | MAFK | 9452 | RF00001-149 | 12752 | ZNF184 |
| 2853 | DHCR24 | 6153 | MAG | 9453 | RF00017-6865 | 12753 | ZNF185 |
| 2854 | DHCR7 | 6154 | MAGEA1 | 9454 | RF00017-7145 | 12754 | ZNF189 |
| 2855 | DHDDS | 6155 | MAGEA11 | 9455 | RFC1 | 12755 | ZNF202 |
| 2856 | DHDH | 6156 | MAGEA12 | 9456 | RFC2 | 12756 | ZNF205 |
| 2857 | DHFR | 6157 | MAGEA2 | 9457 | RFC3 | 12757 | ZNF207 |
| 2858 | DHH | 6158 | MAGEA2B | 9458 | RFC4 | 12758 | ZNF212 |
| 2859 | DHODH | 6159 | MAGEA3 | 9459 | RFC5 | 12759 | ZNF217 |
| 2860 | DHPS | 6160 | MAGEA4 | 9460 | RFFL | 12760 | ZNF22 |
| 2861 | DHRS1 | 6161 | MAGEA8 | 9461 | RFK | 12761 | ZNF224 |
| 2862 | DHRS2 | 6162 | MAGEB2 | 9462 | RFWD3 | 12762 | ZNF227 |
| 2863 | DHRS3 | 6163 | MAGEC1 | 9463 | RFX1 | 12763 | ZNF23 |
| 2864 | DHRS4 | 6164 | MAGEC2 | 9464 | RFX2 | 12764 | ZNF24 |
| 2865 | DHRS7 | 6165 | MAGED1 | 9465 | RFX3 | 12765 | ZNF251 |
| 2866 | DHRS9 | 6166 | MAGED2 | 9466 | RFX5 | 12766 | ZNF254 |
| 2867 | DHTKD1 | 6167 | MAGED4B | 9467 | RFX7 | 12767 | ZNF263 |
| 2868 | DHX15 | 6168 | MAGEE1 | 9468 | RFXANK | 12768 | ZNF264 |
| 2869 | DHX16 | 6169 | MAGEH1 | 9469 | RFXAP | 12769 | ZNF267 |
| 2870 | DHX29 | 6170 | MAGI2 | 9470 | RGCC | 12770 | ZNF268 |
| 2871 | DHX30 | 6171 | MAGI3 | 9471 | RGL2 | 12771 | ZNF274 |
| 2872 | DHX32 | 6172 | MAGOH | 9472 | RGL3 | 12772 | ZNF275 |
| 2873 | DHX33 | 6173 | MAGT1 | 9473 | RGL4 | 12773 | ZNF276 |
| 2874 | DHX34 | 6174 | MAK | 9474 | RGMA | 12774 | ZNF28 |
| 2875 | DHX36 | 6175 | MAK16 | 9475 | RGMB | 12775 | ZNF280B |
| 2876 | DHX37 | 6176 | MAL | 9476 | RGN | 12776 | ZNF280D |
| 2877 | DHX38 | 6177 | MALAT1 | 9477 | RGPD2 | 12777 | ZNF281 |
| 2878 | DHX40 | 6178 | MALRD1 | 9478 | RGPD4 | 12778 | ZNF283 |
| 2879 | DHX58 | 6179 | MALT1 | 9479 | RGPD5 | 12779 | ZNF286A |
| 2880 | DHX8 | 6180 | MAML1 | 9480 | RGPD8 | 12780 | ZNF292 |
| 2881 | DHX9 | 6181 | MAMLD1 | 9481 | RGS1 | 12781 | ZNF3 |
| 2882 | DIABLO | 6182 | MAN1A1 | 9482 | RGS10 | 12782 | ZNF300 |
| 2883 | DIAPH1 | 6183 | MAN1A2 | 9483 | RGS11 | 12783 | ZNF317 |
| 2884 | DIAPH2 | 6184 | MAN1B1 | 9484 | RGS12 | 12784 | ZNF318 |
| 2885 | DIAPH3 | 6185 | MAN2A1 | 9485 | RGS13 | 12785 | ZNF319 |
| 2886 | DICER1 | 6186 | MAN2B1 | 9486 | RGS14 | 12786 | ZNF32 |
| 2887 | DIDO1 | 6187 | MAN2C1 | 9487 | RGS16 | 12787 | ZNF320 |
| 2888 | DIMT1 | 6188 | MANBA | 9488 | RGS18 | 12788 | ZNF324 |
| 2889 | DIO2 | 6189 | MANCR | 9489 | RGS19 | 12789 | ZNF326 |
| 2890 | DIO3 | 6190 | MANF | 9490 | RGS2 | 12790 | ZNF329 |
| 2891 | DIP2B | 6191 | MAOA | 9491 | RGS20 | 12791 | ZNF331 |
| 2892 | DIPK1A | 6192 | MAOB | 9492 | RGS3 | 12792 | ZNF335 |
| 2893 | DIPK2A | 6193 | MAP11 | 9493 | RGS4 | 12793 | ZNF341 |
| 2894 | DIRAS3 | 6194 | MAP1A | 9494 | RGS5 | 12794 | ZNF346 |
| 2895 | DIRC1 | 6195 | MAP1B | 9495 | RHAG | 12795 | ZNF350 |
| 2896 | DIS3 | 6196 | MAP1LC3A | 9496 | RHBDD1 | 12796 | ZNF354A |
| 2897 | DIS3L | 6197 | MAP1LC3B | 9497 | RHBDD2 | 12797 | ZNF358 |
| 2898 | DIS3L2 | 6198 | MAP1LC3C | 9498 | RHBDD3 | 12798 | ZNF362 |
| 2899 | DISC1 | 6199 | MAP1S | 9499 | RHBDF2 | 12799 | ZNF365 |
| 2900 | DISC2 | 6200 | MAP2 | 9500 | RHCE | 12800 | ZNF367 |
| 2901 | DISP2 | 6201 | MAP2K1 | 9501 | RHD | 12801 | ZNF384 |
| 2902 | DISP3 | 6202 | MAP2K2 | 9502 | RHEB | 12802 | ZNF385A |
| 2903 | DIXDC1 | 6203 | MAP2K3 | 9503 | RHNO1 | 12803 | ZNF395 |
| 2904 | DKC1 | 6204 | MAP2K4 | 9504 | RHO | 12804 | ZNF397 |
| 2905 | DKK1 | 6205 | MAP2K5 | 9505 | RHOA | 12805 | ZNF404 |
| 2906 | DKK2 | 6206 | MAP2K6 | 9506 | RHOB | 12806 | ZNF407 |
| 2907 | DKK3 | 6207 | MAP2K7 | 9507 | RHOBTB2 | 12807 | ZNF408 |
| 2908 | DKK4 | 6208 | MAP3K1 | 9508 | RHOC | 12808 | ZNF41 |
| 2909 | DKKL1 | 6209 | MAP3K11 | 9509 | RHOD | 12809 | ZNF420 |
| 2910 | DLAT | 6210 | MAP3K12 | 9510 | RHOF | 12810 | ZNF423 |
| 2911 | DLC1 | 6211 | MAP3K13 | 9511 | RHOG | 12811 | ZNF436 |
| 2912 | DLD | 6212 | MAP3K14 | 9512 | RHOH | 12812 | ZNF443 |
| 2913 | DLEC1 | 6213 | MAP3K15 | 9513 | RHOJ | 12813 | ZNF444 |
| 2914 | DLG1 | 6214 | MAP3K19 | 9514 | RHOT1 | 12814 | ZNF446 |
| 2915 | DLG2 | 6215 | MAP3K2 | 9515 | RHOT2 | 12815 | ZNF451 |
| 2916 | DLG3 | 6216 | MAP3K20 | 9516 | RHOU | 12816 | ZNF460 |
| 2917 | DLG4 | 6217 | MAP3K21 | 9517 | RHPN1 | 12817 | ZNF462 |
| 2918 | DLG5 | 6218 | MAP3K3 | 9518 | RIC3 | 12818 | ZNF468 |
| 2919 | DLGAP1 | 6219 | MAP3K4 | 9519 | RIC8A | 12819 | ZNF469 |
| 2920 | DLGAP2 | 6220 | MAP3K5 | 9520 | RICTOR | 12820 | ZNF473 |
| 2921 | DLGAP4 | 6221 | MAP3K6 | 9521 | RIDA | 12821 | ZNF48 |
| 2922 | DLGAP5 | 6222 | MAP3K7 | 9522 | RIF1 | 12822 | ZNF483 |
| 2923 | DLK1 | 6223 | MAP3K8 | 9523 | RILP | 12823 | ZNF511 |
| 2924 | DLL1 | 6224 | MAP4 | 9524 | RIMKLB | 12824 | ZNF512 |
| 2925 | DLL3 | 6225 | MAP4K1 | 9525 | RIMS3 | 12825 | ZNF512B |
| 2926 | DLL4 | 6226 | MAP4K2 | 9526 | RIN1 | 12826 | ZNF518A |
| 2927 | DLST | 6227 | MAP4K3 | 9527 | RIN2 | 12827 | ZNF525 |
| 2928 | DLX1 | 6228 | MAP4K4 | 9528 | RING1 | 12828 | ZNF526 |
| 2929 | DLX4 | 6229 | MAP7 | 9529 | RINT1 | 12829 | ZNF527 |
| 2930 | DMAC2L | 6230 | MAP7D1 | 9530 | RIOK1 | 12830 | ZNF532 |
| 2931 | DMAP1 | 6231 | MAP7D3 | 9531 | RIOK2 | 12831 | ZNF536 |
| 2932 | DMBT1 | 6232 | MAP9 | 9532 | RIOK3 | 12832 | ZNF559 |
| 2933 | DMD | 6233 | MAPK1 | 9533 | RIOX1 | 12833 | ZNF566 |
| 2934 | DMGDH | 6234 | MAPK10 | 9534 | RIOX2 | 12834 | ZNF569 |
| 2935 | DMP1 | 6235 | MAPK11 | 9535 | RIPK1 | 12835 | ZNF587 |
| 2936 | DMPK | 6236 | MAPK12 | 9536 | RIPK2 | 12836 | ZNF587B |
| 2937 | DMRT1 | 6237 | MAPK13 | 9537 | RIPK3 | 12837 | ZNF592 |
| 2938 | DMTF1 | 6238 | MAPK14 | 9538 | RIPK4 | 12838 | ZNF593 |
| 2939 | DMTN | 6239 | MAPK1IP1L | 9539 | RIPOR1 | 12839 | ZNF594 |
| 2940 | DMWD | 6240 | MAPK3 | 9540 | RIPOR2 | 12840 | ZNF597 |
| 2941 | DMXL1 | 6241 | MAPK6 | 9541 | RIPPLY1 | 12841 | ZNF598 |
| 2942 | DNA2 | 6242 | MAPK7 | 9542 | RIPPLY2 | 12842 | ZNF608 |
| 2943 | DNAAF1 | 6243 | MAPK8 | 9543 | RIT1 | 12843 | ZNF609 |
| 2944 | DNAAF2 | 6244 | MAPK8IP1 | 9544 | RLBP1 | 12844 | ZNF618 |
| 2945 | DNAAF3 | 6245 | MAPK8IP3 | 9545 | RLF | 12845 | ZNF619 |
| 2946 | DNAAF4 | 6246 | MAPK9 | 9546 | RLIM | 12846 | ZNF622 |
| 2947 | DNAAF4-CCPG1 | 6247 | MAPKAP1 | 9547 | RLN1 | 12847 | ZNF626 |
| 2948 | DNAAF5 | 6248 | MAPKAPK2 | 9548 | RLN2 | 12848 | ZNF629 |
| 2949 | DNAAF6 | 6249 | MAPKAPK3 | 9549 | RLN3 | 12849 | ZNF638 |
| 2950 | DNAH1 | 6250 | MAPKAPK5 | 9550 | RMC1 | 12850 | ZNF641 |
| 2951 | DNAH10 | 6251 | MAPKBP1 | 9551 | RMDN1 | 12851 | ZNF644 |
| 2952 | DNAH10OS | 6252 | MAPRE1 | 9552 | RMDN2 | 12852 | ZNF646 |
| 2953 | DNAH11 | 6253 | MAPRE2 | 9553 | RMDN3 | 12853 | ZNF652 |
| 2954 | DNAH12 | 6254 | MAPRE3 | 9554 | RMI1 | 12854 | ZNF664 |
| 2955 | DNAH14 | 6255 | MAPT | 9555 | RMI2 | 12855 | ZNF667 |
| 2956 | DNAH17 | 6256 | MAPT-AS1 | 9556 | RMND1 | 12856 | ZNF681 |
| 2957 | DNAH2 | 6257 | MAPT-IT1 | 9557 | RMND5A | 12857 | ZNF687 |
| 2958 | DNAH3 | 6258 | MARCHF5 | 9558 | RMRP | 12858 | ZNF697 |
| 2959 | DNAH5 | 6259 | MARCHF6 | 9559 | RMST | 12859 | ZNF70 |
| 2960 | DNAH6 | 6260 | MARCHF7 | 9560 | RN7SL1 | 12860 | ZNF703 |
| 2961 | DNAH7 | 6261 | MARCHF8 | 9561 | RN7SL41P | 12861 | ZNF704 |
| 2962 | DNAH8 | 6262 | MARCKS | 9562 | RNA5SP449 | 12862 | ZNF711 |
| 2963 | DNAH8-AS1 | 6263 | MARCKSL1 | 9563 | RNASE1 | 12863 | ZNF740 |
| 2964 | DNAH9 | 6264 | MARCO | 9564 | RNASE2 | 12864 | ZNF761 |
| 2965 | DNAI1 | 6265 | MARF1 | 9565 | RNASE3 | 12865 | ZNF768 |
| 2966 | DNAI2 | 6266 | MARK1 | 9566 | RNASE4 | 12866 | ZNF771 |
| 2967 | DNAJA1 | 6267 | MARK2 | 9567 | RNASE7 | 12867 | ZNF780B |
| 2968 | DNAJA2 | 6268 | MARK3 | 9568 | RNASEH1 | 12868 | ZNF785 |
| 2969 | DNAJA3 | 6269 | MARK4 | 9569 | RNASEH2A | 12869 | ZNF800 |
| 2970 | DNAJB1 | 6270 | MARS1 | 9570 | RNASEH2B | 12870 | ZNF804A |
| 2971 | DNAJB11 | 6271 | MARS2 | 9571 | RNASEH2B-AS1 | 12871 | ZNF827 |
| 2972 | DNAJB12 | 6272 | MARVELD1 | 9572 | RNASEH2C | 12872 | ZNF830 |
| 2973 | DNAJB13 | 6273 | MARVELD2 | 9573 | RNASEL | 12873 | ZNF93 |
| 2974 | DNAJB1P1 | 6274 | MARVELD3 | 9574 | RNASET2 | 12874 | ZNHIT1 |
| 2975 | DNAJB2 | 6275 | MAS1 | 9575 | RND1 | 12875 | ZNHIT3 |
| 2976 | DNAJB4 | 6276 | MAS1L | 9576 | RND2 | 12876 | ZNHIT6 |
| 2977 | DNAJB6 | 6277 | MASP1 | 9577 | RND3 | 12877 | ZNRD1ASP |
| 2978 | DNAJB9 | 6278 | MASP2 | 9578 | RNF10 | 12878 | ZNRD2 |
| 2979 | DNAJC1 | 6279 | MAST1 | 9579 | RNF103 | 12879 | ZNRF2 |
| 2980 | DNAJC10 | 6280 | MAST2 | 9580 | RNF11 | 12880 | ZP2 |
| 2981 | DNAJC11 | 6281 | MAT1A | 9581 | RNF111 | 12881 | ZP3 |
| 2982 | DNAJC12 | 6282 | MAT2A | 9582 | RNF112 | 12882 | ZPBP2 |
| 2983 | DNAJC13 | 6283 | MAT2B | 9583 | RNF113A | 12883 | ZPLD1 |
| 2984 | DNAJC14 | 6284 | MATK | 9584 | RNF114 | 12884 | ZPR1 |
| 2985 | DNAJC15 | 6285 | MATN2 | 9585 | RNF121 | 12885 | ZRANB1 |
| 2986 | DNAJC19 | 6286 | MATN3 | 9586 | RNF123 | 12886 | ZRANB2 |
| 2987 | DNAJC2 | 6287 | MATR3 | 9587 | RNF125 | 12887 | ZRANB3 |
| 2988 | DNAJC21 | 6288 | MAU2 | 9588 | RNF126 | 12888 | ZRSR2 |
| 2989 | DNAJC3 | 6289 | MAVS | 9589 | RNF128 | 12889 | ZSCAN10 |
| 2990 | DNAJC4 | 6290 | MAX | 9590 | RNF13 | 12890 | ZSCAN12 |
| 2991 | DNAJC5 | 6291 | MAZ | 9591 | RNF135 | 12891 | ZSCAN2 |
| 2992 | DNAJC6 | 6292 | MB | 9592 | RNF138 | 12892 | ZSCAN26 |
| 2993 | DNAJC7 | 6293 | MBD1 | 9593 | RNF139 | 12893 | ZSCAN30 |
| 2994 | DNAJC8 | 6294 | MBD2 | 9594 | RNF14 | 12894 | ZSCAN31 |
| 2995 | DNAJC9 | 6295 | MBD3 | 9595 | RNF144A | 12895 | ZSCAN4 |
| 2996 | DNAL1 | 6296 | MBD4 | 9596 | RNF144B | 12896 | ZSWIM6 |
| 2997 | DNAL4 | 6297 | MBD5 | 9597 | RNF146 | 12897 | ZSWIM7 |
| 2998 | DNALI1 | 6298 | MBD6 | 9598 | RNF168 | 12898 | ZSWIM8 |
| 2999 | DNASE1 | 6299 | MBIP | 9599 | RNF169 | 12899 | ZUP1 |
| 3000 | DNASE1L1 | 6300 | MBL2 | 9600 | RNF17 | 12900 | ZWILCH |
| 3001 | DNASE1L2 | 6301 | MBL3P | 9601 | RNF181 | 12901 | ZWINT |
| 3002 | DNASE1L3 | 6302 | MBNL1 | 9602 | RNF185 | 12902 | ZXDC |
| 3003 | DNASE2 | 6303 | MBOAT2 | 9603 | RNF19A | 12903 | ZYG11A |
| 3004 | DNASE2B | 6304 | MBOAT7 | 9604 | RNF19B | 12904 | ZYG11B |
| 3005 | DNHD1 | 6305 | MBP | 9605 | RNF2 | 12905 | ZYX |
| 3006 | DNLZ | 6306 | MBTPS2 | 9606 | RNF20 | 12906 | ZZEF1 |
| 3007 | DNM1 | 6307 | MC1R | 9607 | RNF213 | 12907 | ZZZ3 |
| 3008 | DNM1L | 6308 | MC2R | 9608 | RNF216 |  |  |
| 3009 | DNM2 | 6309 | MC3R | 9609 | RNF220 |  |  |
| 3010 | DNM3 | 6310 | MC4R | 9610 | RNF24 |  |  |
| 3011 | DNMBP | 6311 | MC5R | 9611 | RNF31 |  |  |
| 3012 | DNMT1 | 6312 | MCAM | 9612 | RNF34 |  |  |
| 3013 | DNMT3A | 6313 | MCAT | 9613 | RNF39 |  |  |
| 3014 | DNMT3B | 6314 | MCC | 9614 | RNF4 |  |  |
| 3015 | DNMT3L | 6315 | MCCC1 | 9615 | RNF40 |  |  |
| 3016 | DNPEP | 6316 | MCCC2 | 9616 | RNF41 |  |  |
| 3017 | DNPH1 | 6317 | MCEE | 9617 | RNF43 |  |  |
| 3018 | DNTT | 6318 | MCF2 | 9618 | RNF5 |  |  |
| 3019 | DNTTIP1 | 6319 | MCF2L2 | 9619 | RNF6 |  |  |
| 3020 | DNTTIP2 | 6320 | MCFD2 | 9620 | RNF7 |  |  |
| 3021 | DOCK1 | 6321 | MCHR1 | 9621 | RNF8 |  |  |
| 3022 | DOCK11 | 6322 | MCIDAS | 9622 | RNGTT |  |  |
| 3023 | DOCK2 | 6323 | MCL1 | 9623 | RNH1 |  |  |
| 3024 | DOCK4 | 6324 | MCM10 | 9624 | RNLS |  |  |
| 3025 | DOCK5 | 6325 | MCM2 | 9625 | RNMT |  |  |
| 3026 | DOCK6 | 6326 | MCM3 | 9626 | RNPC3 |  |  |
| 3027 | DOCK7 | 6327 | MCM3AP | 9627 | RNPEP |  |  |
| 3028 | DOCK8 | 6328 | MCM4 | 9628 | RNPS1 |  |  |
| 3029 | DOCK9 | 6329 | MCM5 | 9629 | RNR1 |  |  |
| 3030 | DOK1 | 6330 | MCM6 | 9630 | RNU4ATAC |  |  |
| 3031 | DOK7 | 6331 | MCM7 | 9631 | RNU5A-1 |  |  |
| 3032 | DOLK | 6332 | MCM8 | 9632 | RNU6-1 |  |  |
| 3033 | DOLPP1 | 6333 | MCM9 | 9633 | RNU6-1037P |  |  |
| 3034 | DONSON | 6334 | MCMBP | 9634 | RNU6-649P |  |  |
| 3035 | DOP1B | 6335 | MCOLN1 | 9635 | RNU6-961P |  |  |
| 3036 | DOT1L | 6336 | MCOLN3 | 9636 | RNU6ATAC |  |  |
| 3037 | DPAGT1 | 6337 | MCPH1 | 9637 | RNY1 |  |  |
| 3038 | DPCD | 6338 | MCRIP1 | 9638 | RNY3 |  |  |
| 3039 | DPEP1 | 6339 | MCRIP2 | 9639 | RO60 |  |  |
| 3040 | DPF2 | 6340 | MCRS1 | 9640 | ROBO1 |  |  |
| 3041 | DPF3 | 6341 | MCTP2 | 9641 | ROBO2 |  |  |
| 3042 | DPH1 | 6342 | MCTS1 | 9642 | ROBO3 |  |  |
| 3043 | DPH2 | 6343 | MCU | 9643 | ROBO4 |  |  |
| 3044 | DPM1 | 6344 | MDC1 | 9644 | ROCK1 |  |  |
| 3045 | DPM2 | 6345 | MDFI | 9645 | ROCK2 |  |  |
| 3046 | DPM3 | 6346 | MDH1 | 9646 | ROGDI |  |  |
| 3047 | DPP10 | 6347 | MDH2 | 9647 | ROM1 |  |  |
| 3048 | DPP3 | 6348 | MDK | 9648 | ROMO1 |  |  |
| 3049 | DPP4 | 6349 | MDM1 | 9649 | ROPN1 |  |  |
| 3050 | DPP6 | 6350 | MDM2 | 9650 | ROPN1L |  |  |
| 3051 | DPP7 | 6351 | MDM4 | 9651 | ROR1 |  |  |
| 3052 | DPP8 | 6352 | MDN1 | 9652 | ROR2 |  |  |
| 3053 | DPP9 | 6353 | ME1 | 9653 | RORA |  |  |
| 3054 | DPT | 6354 | ME2 | 9654 | RORB |  |  |
| 3055 | DPY19L2 | 6355 | ME3 | 9655 | RORC |  |  |
| 3056 | DPY30 | 6356 | MECOM | 9656 | ROS1 |  |  |
| 3057 | DPYD | 6357 | MECP2 | 9657 | RP1 |  |  |
| 3058 | DPYS | 6358 | MECR | 9658 | RP2 |  |  |
| 3059 | DPYSL2 | 6359 | MED1 | 9659 | RPA1 |  |  |
| 3060 | DPYSL3 | 6360 | MED10 | 9660 | RPA2 |  |  |
| 3061 | DPYSL4 | 6361 | MED12 | 9661 | RPA3 |  |  |
| 3062 | DPYSL5 | 6362 | MED13 | 9662 | RPA4 |  |  |
| 3063 | DR1 | 6363 | MED13L | 9663 | RPAIN |  |  |
| 3064 | DRAIC | 6364 | MED14 | 9664 | RPAP1 |  |  |
| 3065 | DRAM1 | 6365 | MED15 | 9665 | RPAP3 |  |  |
| 3066 | DRAM2 | 6366 | MED16 | 9666 | RPE65 |  |  |
| 3067 | DRC1 | 6367 | MED17 | 9667 | RPF1 |  |  |
| 3068 | DRC3 | 6368 | MED18 | 9668 | RPF2 |  |  |
| 3069 | DRC7 | 6369 | MED19 | 9669 | RPGR |  |  |
| 3070 | DRD1 | 6370 | MED20 | 9670 | RPGRIP1 |  |  |
| 3071 | DRD2 | 6371 | MED21 | 9671 | RPGRIP1L |  |  |
| 3072 | DRD3 | 6372 | MED22 | 9672 | RPH3A |  |  |
| 3073 | DRD4 | 6373 | MED23 | 9673 | RPIA |  |  |
| 3074 | DRD5 | 6374 | MED24 | 9674 | RPL10 |  |  |
| 3075 | DRG1 | 6375 | MED25 | 9675 | RPL10A |  |  |
| 3076 | DRG2 | 6376 | MED26 | 9676 | RPL10AP3 |  |  |
| 3077 | DROSHA | 6377 | MED27 | 9677 | RPL10L |  |  |
| 3078 | DSC1 | 6378 | MED28 | 9678 | RPL11 |  |  |
| 3079 | DSC2 | 6379 | MED29 | 9679 | RPL12 |  |  |
| 3080 | DSC3 | 6380 | MED30 | 9680 | RPL13 |  |  |
| 3081 | DSE | 6381 | MED31 | 9681 | RPL13A |  |  |
| 3082 | DSG1 | 6382 | MED4 | 9682 | RPL14 |  |  |
| 3083 | DSG2 | 6383 | MED6 | 9683 | RPL15 |  |  |
| 3084 | DSG3 | 6384 | MED7 | 9684 | RPL17 |  |  |
| 3085 | DSN1 | 6385 | MED8 | 9685 | RPL18 |  |  |
| 3086 | DSP | 6386 | MED9 | 9686 | RPL18A |  |  |
| 3087 | DSPP | 6387 | MEF2A | 9687 | RPL19 |  |  |
| 3088 | DST | 6388 | MEF2C | 9688 | RPL21 |  |  |
| 3089 | DSTN | 6389 | MEF2D | 9689 | RPL22 |  |  |
| 3090 | DSTYK | 6390 | MEFV | 9690 | RPL22L1 |  |  |
| 3091 | DTD1 | 6391 | MEG3 | 9691 | RPL23 |  |  |
| 3092 | DTL | 6392 | MEGF10 | 9692 | RPL23A |  |  |
| 3093 | DTNA | 6393 | MEGF8 | 9693 | RPL23AP44 |  |  |
| 3094 | DTNB | 6394 | MEI1 | 9694 | RPL24 |  |  |
| 3095 | DTNBP1 | 6395 | MEIS1 | 9695 | RPL26 |  |  |
| 3096 | DTX1 | 6396 | MEIS2 | 9696 | RPL26L1 |  |  |
| 3097 | DTX2 | 6397 | MELK | 9697 | RPL27 |  |  |
| 3098 | DTX3L | 6398 | MELTF | 9698 | RPL27A |  |  |
| 3099 | DTYMK | 6399 | MEN1 | 9699 | RPL28 |  |  |
| 3100 | DUOX1 | 6400 | MEOX1 | 9700 | RPL28P3 |  |  |
| 3101 | DUOX2 | 6401 | MEOX2 | 9701 | RPL29 |  |  |
| 3102 | DUOXA1 | 6402 | MEP1A | 9702 | RPL3 |  |  |
| 3103 | DUOXA2 | 6403 | MEP1B | 9703 | RPL30 |  |  |
| 3104 | DUS2 | 6404 | MEPCE | 9704 | RPL31 |  |  |
| 3105 | DUS3L | 6405 | MEPE | 9705 | RPL32 |  |  |
| 3106 | DUSP1 | 6406 | MERTK | 9706 | RPL34 |  |  |
| 3107 | DUSP10 | 6407 | MESD | 9707 | RPL35 |  |  |
| 3108 | DUSP11 | 6408 | MESP2 | 9708 | RPL35A |  |  |
| 3109 | DUSP12 | 6409 | MEST | 9709 | RPL36 |  |  |
| 3110 | DUSP13 | 6410 | MET | 9710 | RPL36A |  |  |
| 3111 | DUSP14 | 6411 | METAP1 | 9711 | RPL36AL |  |  |
| 3112 | DUSP15 | 6412 | METAP1D | 9712 | RPL37 |  |  |
| 3113 | DUSP16 | 6413 | METAP2 | 9713 | RPL37A |  |  |
| 3114 | DUSP19 | 6414 | METTL1 | 9714 | RPL38 |  |  |
| 3115 | DUSP2 | 6415 | METTL23 | 9715 | RPL39 |  |  |
| 3116 | DUSP26 | 6416 | METTL2B | 9716 | RPL39L |  |  |
| 3117 | DUSP3 | 6417 | METTL3 | 9717 | RPL3L |  |  |
| 3118 | DUSP4 | 6418 | METTL4 | 9718 | RPL4 |  |  |
| 3119 | DUSP5 | 6419 | METTL7A | 9719 | RPL41 |  |  |
| 3120 | DUSP6 | 6420 | METTL7B | 9720 | RPL5 |  |  |
| 3121 | DUSP9 | 6421 | METTL9 | 9721 | RPL6 |  |  |
| 3122 | DUT | 6422 | MEX3B | 9722 | RPL7 |  |  |
| 3123 | DUX4 | 6423 | MEX3C | 9723 | RPL7A |  |  |
| 3124 | DUX4L1 | 6424 | MEX3D | 9724 | RPL7L1 |  |  |
| 3125 | DUXAP10 | 6425 | MFAP1 | 9725 | RPL8 |  |  |
| 3126 | DUXAP9 | 6426 | MFAP2 | 9726 | RPL9 |  |  |
| 3127 | DVL1 | 6427 | MFAP4 | 9727 | RPLP0 |  |  |
| 3128 | DVL2 | 6428 | MFAP5 | 9728 | RPLP0P6 |  |  |
| 3129 | DVL3 | 6429 | MFF | 9729 | RPLP1 |  |  |
| 3130 | DYNC1H1 | 6430 | MFGE8 | 9730 | RPLP2 |  |  |
| 3131 | DYNC1I1 | 6431 | MFN1 | 9731 | RPN1 |  |  |
| 3132 | DYNC1I2 | 6432 | MFN2 | 9732 | RPN2 |  |  |
| 3133 | DYNC1LI1 | 6433 | MFSD10 | 9733 | RPP30 |  |  |
| 3134 | DYNC1LI2 | 6434 | MFSD2A | 9734 | RPP38 |  |  |
| 3135 | DYNC2H1 | 6435 | MFSD8 | 9735 | RPP40 |  |  |
| 3136 | DYNC2I1 | 6436 | MG828730-062 | 9736 | RPRD1A |  |  |
| 3137 | DYNC2I2 | 6437 | MGA | 9737 | RPRD1B |  |  |
| 3138 | DYNC2LI1 | 6438 | MGAM | 9738 | RPRD2 |  |  |
| 3139 | DYNLL1 | 6439 | MGAT1 | 9739 | RPRM |  |  |
| 3140 | DYNLL2 | 6440 | MGAT2 | 9740 | RPS10 |  |  |
| 3141 | DYNLRB1 | 6441 | MGAT4C | 9741 | RPS11 |  |  |
| 3142 | DYNLT1 | 6442 | MGAT5B | 9742 | RPS12 |  |  |
| 3143 | DYRK1A | 6443 | MGC27382 | 9743 | RPS13 |  |  |
| 3144 | DYRK1B | 6444 | MGME1 | 9744 | RPS14 |  |  |
| 3145 | DYRK2 | 6445 | MGMT | 9745 | RPS15A |  |  |
| 3146 | DYRK3 | 6446 | MGP | 9746 | RPS16 |  |  |
| 3147 | DYSF | 6447 | MGST1 | 9747 | RPS17 |  |  |
| 3148 | DZANK1 | 6448 | MGST2 | 9748 | RPS18 |  |  |
| 3149 | DZIP1 | 6449 | MGST3 | 9749 | RPS19 |  |  |
| 3150 | DZIP1L | 6450 | MHRT | 9750 | RPS19BP1 |  |  |
| 3151 | DZIP3 | 6451 | MIA2 | 9751 | RPS2 |  |  |
| 3152 | E2F1 | 6452 | MIA3 | 9752 | RPS20 |  |  |
| 3153 | E2F2 | 6453 | MIAT | 9753 | RPS21 |  |  |
| 3154 | E2F3 | 6454 | MIB1 | 9754 | RPS23 |  |  |
| 3155 | E2F4 | 6455 | MIB2 | 9755 | RPS24 |  |  |
| 3156 | E2F5 | 6456 | MICA | 9756 | RPS25 |  |  |
| 3157 | E2F6 | 6457 | MICAL2 | 9757 | RPS26 |  |  |
| 3158 | E2F7 | 6458 | MICAL3 | 9758 | RPS27 |  |  |
| 3159 | E2F8 | 6459 | MICALL1 | 9759 | RPS27A |  |  |
| 3160 | E4F1 | 6460 | MICALL2 | 9760 | RPS27L |  |  |
| 3161 | EAF1 | 6461 | MICB | 9761 | RPS28 |  |  |
| 3162 | EAF2 | 6462 | MICD | 9762 | RPS29 |  |  |
| 3163 | EAPP | 6463 | MICE | 9763 | RPS3 |  |  |
| 3164 | EARS2 | 6464 | MICOS10 | 9764 | RPS3A |  |  |
| 3165 | EBAG9 | 6465 | MICOS10-NBL1 | 9765 | RPS4X |  |  |
| 3166 | EBF1 | 6466 | MICOS13 | 9766 | RPS5 |  |  |
| 3167 | EBF3 | 6467 | MICU1 | 9767 | RPS6 |  |  |
| 3168 | EBI3 | 6468 | MICU2 | 9768 | RPS6KA1 |  |  |
| 3169 | EBNA1BP2 | 6469 | MID1 | 9769 | RPS6KA2 |  |  |
| 3170 | EBP | 6470 | MID1IP1 | 9770 | RPS6KA3 |  |  |
| 3171 | ECE1 | 6471 | MIDEAS | 9771 | RPS6KA4 |  |  |
| 3172 | ECE2 | 6472 | MIEF1 | 9772 | RPS6KA5 |  |  |
| 3173 | ECEL1 | 6473 | MIEN1 | 9773 | RPS6KA6 |  |  |
| 3174 | ECH1 | 6474 | MIER1 | 9774 | RPS6KB1 |  |  |
| 3175 | ECHDC2 | 6475 | MIF | 9775 | RPS6KB2 |  |  |
| 3176 | ECHS1 | 6476 | MIF4GD | 9776 | RPS6KC1 |  |  |
| 3177 | ECI2 | 6477 | MIGA1 | 9777 | RPS7 |  |  |
| 3178 | ECM1 | 6478 | MIGA2 | 9778 | RPS8 |  |  |
| 3179 | ECPAS | 6479 | MINDY1 | 9779 | RPS9 |  |  |
| 3180 | ECT2 | 6480 | MINDY2 | 9780 | RPSA |  |  |
| 3181 | EDA | 6481 | MINDY3 | 9781 | RPSAP58 |  |  |
| 3182 | EDAR | 6482 | MINK1 | 9782 | RPTOR |  |  |
| 3183 | EDARADD | 6483 | MINPP1 | 9783 | RPUSD4 |  |  |
| 3184 | EDC3 | 6484 | MIOX | 9784 | RRAD |  |  |
| 3185 | EDC4 | 6485 | MIP | 9785 | RRAGB |  |  |
| 3186 | EDEM1 | 6486 | MIPEP | 9786 | RRAGC |  |  |
| 3187 | EDF1 | 6487 | MIPOL1 | 9787 | RRAGD |  |  |
| 3188 | EDIL3 | 6488 | MIR100 | 9788 | RRAS |  |  |
| 3189 | EDN1 | 6489 | MIR100HG | 9789 | RRAS2 |  |  |
| 3190 | EDN2 | 6490 | MIR101-1 | 9790 | RRBP1 |  |  |
| 3191 | EDN3 | 6491 | MIR101-2 | 9791 | RREB1 |  |  |
| 3192 | EDNRA | 6492 | MIR103A1 | 9792 | RRM1 |  |  |
| 3193 | EDNRB | 6493 | MIR103A2 | 9793 | RRM2 |  |  |
| 3194 | EEA1 | 6494 | MIR106A | 9794 | RRM2B |  |  |
| 3195 | EED | 6495 | MIR106B | 9795 | RRN3 |  |  |
| 3196 | EEF1A1 | 6496 | MIR107 | 9796 | RRP1 |  |  |
| 3197 | EEF1A1P5 | 6497 | MIR10A | 9797 | RRP15 |  |  |
| 3198 | EEF1A2 | 6498 | MIR10B | 9798 | RRP1B |  |  |
| 3199 | EEF1AKNMT | 6499 | MIR1-1 | 9799 | RRP7A |  |  |
| 3200 | EEF1B2 | 6500 | MIR1183 | 9800 | RRP8 |  |  |
| 3201 | EEF1D | 6501 | MIR1-2 | 9801 | RRS1 |  |  |
| 3202 | EEF1G | 6502 | MIR122 | 9802 | RS1 |  |  |
| 3203 | EEF2 | 6503 | MIR1224 | 9803 | RSAD2 |  |  |
| 3204 | EEF2K | 6504 | MIR1225 | 9804 | RSBN1L |  |  |
| 3205 | EEFSEC | 6505 | MIR1228 | 9805 | RSF1 |  |  |
| 3206 | EEPD1 | 6506 | MIR1236 | 9806 | RSL1D1 |  |  |
| 3207 | EFCAB5 | 6507 | MIR124-1 | 9807 | RSL24D1 |  |  |
| 3208 | EFCAB6 | 6508 | MIR124-2 | 9808 | RSPH1 |  |  |
| 3209 | EFCAB9 | 6509 | MIR124-3 | 9809 | RSPH14 |  |  |
| 3210 | EFEMP1 | 6510 | MIR1246 | 9810 | RSPH3 |  |  |
| 3211 | EFEMP2 | 6511 | MIR1247 | 9811 | RSPH4A |  |  |
| 3212 | EFHC2 | 6512 | MIR125A | 9812 | RSPH6A |  |  |
| 3213 | EFHD1 | 6513 | MIR125B1 | 9813 | RSPH9 |  |  |
| 3214 | EFHD2 | 6514 | MIR125B2 | 9814 | RSPO1 |  |  |
| 3215 | EFL1 | 6515 | MIR126 | 9815 | RSPO3 |  |  |
| 3216 | EFNA1 | 6516 | MIR127 | 9816 | RSPRY1 |  |  |
| 3217 | EFNA2 | 6517 | MIR1275 | 9817 | RSRC1 |  |  |
| 3218 | EFNA3 | 6518 | MIR128-1 | 9818 | RSU1 |  |  |
| 3219 | EFNA5 | 6519 | MIR128-2 | 9819 | RTBDN |  |  |
| 3220 | EFNB1 | 6520 | MIR129-1 | 9820 | RTCA |  |  |
| 3221 | EFNB2 | 6521 | MIR1299 | 9821 | RTCB |  |  |
| 3222 | EFNB3 | 6522 | MIR1306 | 9822 | RTEL1 |  |  |
| 3223 | EFR3B | 6523 | MIR1307 | 9823 | RTEL1-TNFRSF6B |  |  |
| 3224 | EFS | 6524 | MIR130A | 9824 | RTKN |  |  |
| 3225 | EFTUD2 | 6525 | MIR130B | 9825 | RTKN2 |  |  |
| 3226 | EGF | 6526 | MIR132 | 9826 | RTL10 |  |  |
| 3227 | EGFL7 | 6527 | MIR133A1 | 9827 | RTL3 |  |  |
| 3228 | EGFR | 6528 | MIR133A2 | 9828 | RTN1 |  |  |
| 3229 | EGID-105180392 | 6529 | MIR133B | 9829 | RTN3 |  |  |
| 3230 | EGID-106632268 | 6530 | MIR134 | 9830 | RTN4 |  |  |
| 3231 | EGID-109951028 | 6531 | MIR135A1 | 9831 | RTN4IP1 |  |  |
| 3232 | EGLN1 | 6532 | MIR135A2 | 9832 | RTN4R |  |  |
| 3233 | EGLN2 | 6533 | MIR135B | 9833 | RTN4RL1 |  |  |
| 3234 | EGLN3 | 6534 | MIR136 | 9834 | RTN4RL2 |  |  |
| 3235 | EGOT | 6535 | MIR137 | 9835 | RTP3 |  |  |
| 3236 | EGR1 | 6536 | MIR138-1 | 9836 | RTRAF |  |  |
| 3237 | EGR2 | 6537 | MIR138-2 | 9837 | RUBCN |  |  |
| 3238 | EGR3 | 6538 | MIR139 | 9838 | RUFY1 |  |  |
| 3239 | EHBP1 | 6539 | MIR140 | 9839 | RUFY4 |  |  |
| 3240 | EHBP1L1 | 6540 | MIR141 | 9840 | RUNDC1 |  |  |
| 3241 | EHD1 | 6541 | MIR142 | 9841 | RUNX1 |  |  |
| 3242 | EHD2 | 6542 | MIR143 | 9842 | RUNX1T1 |  |  |
| 3243 | EHD4 | 6543 | MIR144 | 9843 | RUNX2 |  |  |
| 3244 | EHF | 6544 | MIR145 | 9844 | RUNX3 |  |  |
| 3245 | EHHADH | 6545 | MIR146A | 9845 | RUSC2 |  |  |
| 3246 | EHMT1 | 6546 | MIR146B | 9846 | RUSF1 |  |  |
| 3247 | EHMT2 | 6547 | MIR147A | 9847 | RUVBL1 |  |  |
| 3248 | EI24 | 6548 | MIR148A | 9848 | RUVBL2 |  |  |
| 3249 | EID2 | 6549 | MIR148B | 9849 | RWDD1 |  |  |
| 3250 | EIF1 | 6550 | MIR149 | 9850 | RWDD2B |  |  |
| 3251 | EIF1AD | 6551 | MIR150 | 9851 | RWDD4 |  |  |
| 3252 | EIF2A | 6552 | MIR151A | 9852 | RXFP1 |  |  |
| 3253 | EIF2AK1 | 6553 | MIR152 | 9853 | RXFP2 |  |  |
| 3254 | EIF2AK2 | 6554 | MIR153-1 | 9854 | RXRA |  |  |
| 3255 | EIF2AK3 | 6555 | MIR154 | 9855 | RXRB |  |  |
| 3256 | EIF2AK4 | 6556 | MIR155 | 9856 | RXRG |  |  |
| 3257 | EIF2B1 | 6557 | MIR15A | 9857 | RYBP |  |  |
| 3258 | EIF2B2 | 6558 | MIR15B | 9858 | RYK |  |  |
| 3259 | EIF2B3 | 6559 | MIR16-1 | 9859 | RYR1 |  |  |
| 3260 | EIF2B4 | 6560 | MIR16-2 | 9860 | RYR2 |  |  |
| 3261 | EIF2B5 | 6561 | MIR17 | 9861 | RYR3 |  |  |
| 3262 | EIF2D | 6562 | MIR17HG | 9862 | S100A1 |  |  |
| 3263 | EIF2S1 | 6563 | MIR181A1 | 9863 | S100A10 |  |  |
| 3264 | EIF2S2 | 6564 | MIR181A2 | 9864 | S100A11 |  |  |
| 3265 | EIF2S3 | 6565 | MIR181B1 | 9865 | S100A12 |  |  |
| 3266 | EIF3A | 6566 | MIR181B2 | 9866 | S100A13 |  |  |
| 3267 | EIF3B | 6567 | MIR181C | 9867 | S100A14 |  |  |
| 3268 | EIF3C | 6568 | MIR181D | 9868 | S100A16 |  |  |
| 3269 | EIF3CL | 6569 | MIR182 | 9869 | S100A2 |  |  |
| 3270 | EIF3D | 6570 | MIR183 | 9870 | S100A4 |  |  |
| 3271 | EIF3E | 6571 | MIR184 | 9871 | S100A6 |  |  |
| 3272 | EIF3F | 6572 | MIR185 | 9872 | S100A7 |  |  |
| 3273 | EIF3G | 6573 | MIR186 | 9873 | S100A8 |  |  |
| 3274 | EIF3H | 6574 | MIR187 | 9874 | S100A9 |  |  |
| 3275 | EIF3I | 6575 | MIR18A | 9875 | S100B |  |  |
| 3276 | EIF3J | 6576 | MIR18B | 9876 | S100G |  |  |
| 3277 | EIF3K | 6577 | MIR190A | 9877 | S100P |  |  |
| 3278 | EIF3L | 6578 | MIR191 | 9878 | S100PBP |  |  |
| 3279 | EIF3M | 6579 | MIR1915 | 9879 | S1PR1 |  |  |
| 3280 | EIF4A1 | 6580 | MIR192 | 9880 | S1PR2 |  |  |
| 3281 | EIF4A2 | 6581 | MIR193A | 9881 | S1PR3 |  |  |
| 3282 | EIF4A3 | 6582 | MIR193B | 9882 | S1PR4 |  |  |
| 3283 | EIF4B | 6583 | MIR194-1 | 9883 | SAA1 |  |  |
| 3284 | EIF4E | 6584 | MIR194-2 | 9884 | SAA2 |  |  |
| 3285 | EIF4E2 | 6585 | MIR195 | 9885 | SAA4 |  |  |
| 3286 | EIF4EBP1 | 6586 | MIR196A1 | 9886 | SAAL1 |  |  |
| 3287 | EIF4EBP3 | 6587 | MIR196A2 | 9887 | SAC3D1 |  |  |
| 3288 | EIF4ENIF1 | 6588 | MIR196B | 9888 | SACM1L |  |  |
| 3289 | EIF4G1 | 6589 | MIR197 | 9889 | SACS |  |  |
| 3290 | EIF4G2 | 6590 | MIR198 | 9890 | SAE1 |  |  |
| 3291 | EIF4G3 | 6591 | MIR199A1 | 9891 | SAFB |  |  |
| 3292 | EIF4H | 6592 | MIR199A2 | 9892 | SAFB2 |  |  |
| 3293 | EIF5 | 6593 | MIR199B | 9893 | SAG |  |  |
| 3294 | EIF5A | 6594 | MIR19A | 9894 | SAGE1 |  |  |
| 3295 | EIF5A2 | 6595 | MIR19B1 | 9895 | SALL1 |  |  |
| 3296 | EIF5AL1 | 6596 | MIR19B2 | 9896 | SALL2 |  |  |
| 3297 | EIF5B | 6597 | MIR200A | 9897 | SALL4 |  |  |
| 3298 | EIF6 | 6598 | MIR200B | 9898 | SAMD1 |  |  |
| 3299 | EIPR1 | 6599 | MIR200C | 9899 | SAMD12 |  |  |
| 3300 | ELAC2 | 6600 | MIR202 | 9900 | SAMD4B |  |  |

**Table S3**. Totally 352 intersection targets of HDWE and liver injury-related targets

| No. | Gene Symbol | No. | Gene Symbol | No. | Gene Symbol | No. | Gene Symbol |
| --- | --- | --- | --- | --- | --- | --- | --- |
| 1 | TNF | 91 | DNMT3A | 181 | PTPN2 | 271 | SENP7 |
| 2 | IL6 | 92 | MCL1 | 182 | LIMK1 | 272 | CA5A |
| 3 | IL1B | 93 | PIK3CG | 183 | PGR | 273 | TNKS |
| 4 | NR1H4 | 94 | HSPA5 | 184 | CES2 | 274 | PDE4D |
| 5 | PPARG | 95 | GLA | 185 | AKR1C4 | 275 | AOC1 |
| 6 | F2 | 96 | CYP17A1 | 186 | P4HB | 276 | CDA |
| 7 | AKT1 | 97 | SLC6A4 | 187 | CD22 | 277 | PFKFB3 |
| 8 | TLR2 | 98 | ALOX5 | 188 | CSNK2A1 | 278 | ANTXR2 |
| 9 | MPO | 99 | FLT3 | 189 | B4GALT1 | 279 | PRKCH |
| 10 | TTR | 100 | NR1I3 | 190 | FABP3 | 280 | IMPDH1 |
| 11 | CFTR | 101 | CHEK1 | 191 | DAPK1 | 281 | ITPR1 |
| 12 | NOS2 | 102 | MGMT | 192 | BACE1 | 282 | FABP5 |
| 13 | TNFRSF1A | 103 | CYP1B1 | 193 | MITF | 283 | MSRA |
| 14 | EGFR | 104 | CES1 | 194 | TUBB1 | 284 | ACLY |
| 15 | INSR | 105 | CREB1 | 195 | NPC1L1 | 285 | ERAP1 |
| 16 | MET | 106 | GJB2 | 196 | FGF1 | 286 | LGALS8 |
| 17 | CASP3 | 107 | AVPR2 | 197 | RPS6KA3 | 287 | LTB4R |
| 18 | TERT | 108 | NQO1 | 198 | TPH1 | 288 | LGALS4 |
| 19 | TLR4 | 109 | CYP19A1 | 199 | FTO | 289 | CBR1 |
| 20 | ABCC2 | 110 | AKR1A1 | 200 | GLO1 | 290 | LGALS9 |
| 21 | NFKB1 | 111 | ABCG2 | 201 | MPG | 291 | CA14 |
| 22 | RELA | 112 | NAT2 | 202 | CYP2C8 | 292 | PTGES |
| 23 | NFE2L2 | 113 | NR3C1 | 203 | PREP | 293 | ALDH1A2 |
| 24 | HRAS | 114 | MAOA | 204 | DUSP1 | 294 | LDHB |
| 25 | AGL | 115 | IGF1R | 205 | HSD11B2 | 295 | ADRB1 |
| 26 | PTPRC | 116 | MMP3 | 206 | HSF1 | 296 | NUAK1 |
| 27 | ESR1 | 117 | ABCC1 | 207 | PLA2G1B | 297 | DNMT3L |
| 28 | NR1H3 | 118 | MMP7 | 208 | NSD2 | 298 | CA5B |
| 29 | APP | 119 | FGB | 209 | LCK | 299 | PTPN13 |
| 30 | MMP9 | 120 | CDC25A | 210 | PIN1 | 300 | ENGASE |
| 31 | VEGFA | 121 | APEX1 | 211 | TDP1 | 301 | TRPA1 |
| 32 | TCF4 | 122 | GLB1 | 212 | AKR1B10 | 302 | ALOX15 |
| 33 | PPARA | 123 | CCNB1 | 213 | ADORA2B | 303 | FFAR1 |
| 34 | SRC | 124 | PTK2 | 214 | POLB | 304 | NEK6 |
| 35 | G6PD | 125 | SELL | 215 | SOAT2 | 305 | CCNB2 |
| 36 | PTPN11 | 126 | TLR1 | 216 | PPARD | 306 | ENTPD2 |
| 37 | PYGL | 127 | SCD | 217 | SLC5A4 | 307 | CAMK2B |
| 38 | SIRT1 | 128 | MMP12 | 218 | HES1 | 308 | ADRA2A |
| 39 | CXCL12 | 129 | MYLK | 219 | ALPI | 309 | PTGER2 |
| 40 | IL2 | 130 | ACHE | 220 | SLC5A2 | 310 | TNKS2 |
| 41 | CD81 | 131 | CDK6 | 221 | SLC5A1 | 311 | AMY2A |
| 42 | MMP1 | 132 | CNR1 | 222 | CA4 | 312 | GRIK2 |
| 43 | FOS | 133 | AKR1B1 | 223 | NCOA3 | 313 | HKDC1 |
| 44 | ADA | 134 | ERN1 | 224 | AXL | 314 | PGAM1 |
| 45 | PIK3R1 | 135 | FABP4 | 225 | CASP6 | 315 | SENP6 |
| 46 | ARG1 | 136 | LGALS3 | 226 | AKR1C1 | 316 | DUSP3 |
| 47 | GAA | 137 | SMARCA2 | 227 | AKR1C3 | 317 | IMPDH2 |
| 48 | F3 | 138 | SHBG | 228 | PTPN6 | 318 | PTPRS |
| 49 | ABCB1 | 139 | GPBAR1 | 229 | ELAVL1 | 319 | ATG4B |
| 50 | MAPT | 140 | TOP2A | 230 | FAP | 320 | ASF1A |
| 51 | PTGS2 | 141 | PTGS1 | 231 | CYP51A1 | 321 | DRD4 |
| 52 | MMP2 | 142 | ALK | 232 | LPO | 322 | SAE1 |
| 53 | AR | 143 | IKBKG | 233 | RORA | 323 | UBA2 |
| 54 | FABP1 | 144 | PTPN1 | 234 | SRD5A1 | 324 | ADRA2C |
| 55 | CBS | 145 | SLC6A3 | 235 | ALDH1B1 | 325 | SYN1 |
| 56 | PARP1 | 146 | TOP1 | 236 | TDO2 | 326 | CDK5R1 |
| 57 | SMAD3 | 147 | CD69 | 237 | ALOX12 | 327 | PKN1 |
| 58 | ELANE | 148 | AURKB | 238 | ST6GAL1 | 328 | SLC5A11 |
| 59 | AGTR1 | 149 | SI | 239 | CA1 | 329 | KCND3 |
| 60 | CYP1A1 | 150 | MAG | 240 | NQO2 | 330 | FNTA |
| 61 | BCL2 | 151 | HK2 | 241 | LGALS7 | 331 | SLC28A2 |
| 62 | SERPINA6 | 152 | CA2 | 242 | ADORA3 | 332 | AMY1A |
| 63 | GAPDH | 153 | HPSE | 243 | PARG | 333 | PTGIR |
| 64 | ALDH2 | 154 | MGAM | 244 | CA9 | 334 | TUBB2B |
| 65 | PYGM | 155 | PLCG1 | 245 | SOAT1 | 335 | SENP8 |
| 66 | GUSB | 156 | AKR1C2 | 246 | DYRK1A | 336 | GRIK1 |
| 67 | MDM2 | 157 | MAOB | 247 | BCL2A1 | 337 | CYP11B1 |
| 68 | HMGCR | 158 | NR3C2 | 248 | CYP11B2 | 338 | SLC16A7 |
| 69 | FGF2 | 159 | MMP8 | 249 | NT5E | 339 | PTGER1 |
| 70 | SLCO1B1 | 160 | OPRM1 | 250 | SIGMAR1 | 340 | GRK6 |
| 71 | IL5 | 161 | APAF1 | 251 | ST3GAL3 | 341 | PHLPP2 |
| 72 | CDK1 | 162 | MMP13 | 252 | FAAH | 342 | HCAR2 |
| 73 | FASN | 163 | PLK1 | 253 | PGD | 343 | P2RX2 |
| 74 | ADRB2 | 164 | NOX4 | 254 | PIM1 | 344 | CHRM2 |
| 75 | HSP90AA1 | 165 | PDE5A | 255 | CDC25B | 345 | CA6 |
| 76 | ESR2 | 166 | HSD11B1 | 256 | TLK1 | 346 | P2RY6 |
| 77 | MIF | 167 | CDK5 | 257 | LGALS7B | 347 | P2RY4 |
| 78 | CXCR1 | 168 | PADI4 | 258 | HSD17B1 | 348 | ENTPD3 |
| 79 | KDR | 169 | ODC1 | 259 | KCNB1 | 349 | NMUR2 |
| 80 | BCL2L1 | 170 | ACP1 | 260 | PTPRF | 350 | CA12 |
| 81 | CDK2 | 171 | SYK | 261 | RORC | 351 | P2RY14 |
| 82 | XDH | 172 | ADORA2A | 262 | PTGER4 | 352 | TMIGD3 |
| 83 | GSK3B | 173 | SGK1 | 263 | NEK2 |  |  |
| 84 | TYR | 174 | YARS1 | 264 | TDP2 |  |  |
| 85 | MAPK3 | 175 | LGALS1 | 265 | P2RY2 |  |  |
| 86 | SELP | 176 | IDO1 | 266 | CHIA |  |  |
| 87 | GPR35 | 177 | ADORA1 | 267 | CA7 |  |  |
| 88 | ADK | 178 | USP7 | 268 | PTP4A3 |  |  |
| 89 | CYP2C19 | 179 | CD38 | 269 | CA3 |  |  |
| 90 | SLC37A4 | 180 | EPHX2 | 270 | CELA1 |  |  |

**Table S4**. The topological analysis result of compound-target-pathway network

| **BetweennessCentrality** | **Closeness**  **Centrality** | **Degree** | **name** |
| --- | --- | --- | --- |
| 0.155916593 | 0.523364486 | 23 | PIK3R1 |
| 0.097456252 | 0.455284553 | 17 | SRC |
| 0.090433465 | 0.455284553 | 13 | IL6 |
| 0.088291147 | 0.478632479 | 19 | EGFR |
| 0.082567656 | 0.478632479 | 18 | HRAS |
| 0.079166072 | 0.455284553 | 17 | MAPK3 |
| 0.062879602 | 0.421052632 | 15 | IL2 |
| 0.058914731 | 0.434108527 | 14 | RELA |
| 0.057204282 | 0.466666667 | 11 | (E/Z)-6-O-(p-feruloyl)scandoside methyl ester |
| 0.055610854 | 0.448 | 15 | NFKB1 |
| 0.044199258 | 0.482758621 | 10 | PI3K-Akt signaling pathway |
| 0.03953616 | 0.427480916 | 16 | AKT1 |
| 0.034302987 | 0.466666667 | 8 | Estrogen signaling pathway |
| 0.033554098 | 0.474576271 | 8 | Chemokine signaling pathway |
| 0.031658118 | 0.474576271 | 9 | Quercetin-3-O-sophoroside |
| 0.031658118 | 0.474576271 | 9 | Kaempferol-3-O-(2-O-β-D-glucopyranosyl)-β-D-galactopyranoside or isomer |
| 0.028625968 | 0.459016393 | 7 | Coniferin |
| 0.026745698 | 0.459016393 | 7 | 1-Hydroxy-2-methoxy-3-methyl-anthraquinone |
| 0.021249801 | 0.444444444 | 8 | HIF-1 signaling pathway |
| 0.020839167 | 0.444444444 | 8 | Ras signaling pathway |
| 0.019870455 | 0.430769231 | 7 | B cell receptor signaling pathway |
| 0.019870455 | 0.430769231 | 7 | T cell receptor signaling pathway |
| 0.018944369 | 0.430769231 | 8 | Quercetin-3-O-[2-O-(6-O-E-sinapoyl)-β-D-glucopymosyl]-β-D-glucopyran |
| 0.0142342 | 0.424242424 | 7 | Quercetin-3-O-sambubioside |
